# Supplementary material for: Sex differences and rehabilitation needs after hospital discharge for COVID-19: an Italian cross-sectional study
Source: PubMed Central journal article supplement — BMJ Open. 2022 May 18;12(5):e055308. doi: 10.1136/bmjopen-2021-055308 (PMC9118361; doi:10.1136/bmjopen-2021-055308), 2022-05-18
Supplement: bmjopen-2021-055308.draft_revisions.pdf [file bmjopen-2021-055308.draft_revisions.pdf]

# BMJ Open

BMJ Open is committed to open peer review. As part of this commitment we make the peer review history of every article we publish publicly available.

When an article is published we post the peer reviewers' comments and the authors' responses online. We also post the versions of the paper that were used during peer review. These are the versions that the peer review comments apply to.

The versions of the paper that follow are the versions that were submitted during the peer review process. They are not the versions of record or the final published versions. They should not be cited or distributed as the published version of this manuscript.

BMJ Open is an open access journal and the full, final, typeset and author-corrected version of record of the manuscript is available on our site with no access controls, subscription charges or pay-per-view fees (<http://bmjopen.bmj.com>).

If you have any questions on BMJ Open's open peer review process please email [info.bmjopen@bmj.com](mailto:info.bmjopen@bmj.com)

# BMJ Open

## Sex Differences and Rehabilitation Needs after Hospital Discharge for COVID-19: An Italian Cross-sectional Study.

|                               |                                                                                                                                                                                                                                                                                                                                                                                                                                                                                                                                                                                                                                                                                                                                                                                                                                                                                                                                                                                                                                                                                                                                                                                                                                                                                                                                                                                                                                                                                                                                                                                                                                                                                                                                                                                           |
|-------------------------------|-------------------------------------------------------------------------------------------------------------------------------------------------------------------------------------------------------------------------------------------------------------------------------------------------------------------------------------------------------------------------------------------------------------------------------------------------------------------------------------------------------------------------------------------------------------------------------------------------------------------------------------------------------------------------------------------------------------------------------------------------------------------------------------------------------------------------------------------------------------------------------------------------------------------------------------------------------------------------------------------------------------------------------------------------------------------------------------------------------------------------------------------------------------------------------------------------------------------------------------------------------------------------------------------------------------------------------------------------------------------------------------------------------------------------------------------------------------------------------------------------------------------------------------------------------------------------------------------------------------------------------------------------------------------------------------------------------------------------------------------------------------------------------------------|
| Journal:                      | <i>BMJ Open</i>                                                                                                                                                                                                                                                                                                                                                                                                                                                                                                                                                                                                                                                                                                                                                                                                                                                                                                                                                                                                                                                                                                                                                                                                                                                                                                                                                                                                                                                                                                                                                                                                                                                                                                                                                                           |
| Manuscript ID                 | bmjopen-2021-055308                                                                                                                                                                                                                                                                                                                                                                                                                                                                                                                                                                                                                                                                                                                                                                                                                                                                                                                                                                                                                                                                                                                                                                                                                                                                                                                                                                                                                                                                                                                                                                                                                                                                                                                                                                       |
| Article Type:                 | Original research                                                                                                                                                                                                                                                                                                                                                                                                                                                                                                                                                                                                                                                                                                                                                                                                                                                                                                                                                                                                                                                                                                                                                                                                                                                                                                                                                                                                                                                                                                                                                                                                                                                                                                                                                                         |
| Date Submitted by the Author: | 08-Jul-2021                                                                                                                                                                                                                                                                                                                                                                                                                                                                                                                                                                                                                                                                                                                                                                                                                                                                                                                                                                                                                                                                                                                                                                                                                                                                                                                                                                                                                                                                                                                                                                                                                                                                                                                                                                               |
| Complete List of Authors:     | <p>Fugazzaro, Stefania; Azienda Unità Sanitaria Locale - IRCCS Tecnologie Avanzate e Modelli Assistenziali in Oncologia di Reggio Emilia, Physical Medicine and Rehabilitation Unit</p> <p>Denti, Monica; Azienda USL - IRCCS di Reggio Emilia, Physical Medicine and Rehabilitation Unit</p> <p>Mainini, Carlotta; Azienda Unità Sanitaria Locale - IRCCS Tecnologie Avanzate e Modelli Assistenziali in Oncologia di Reggio Emilia, Physical Medicine and Rehabilitation Unit</p> <p>Accogli, Monia; Azienda Unità Sanitaria Locale - IRCCS Tecnologie Avanzate e Modelli Assistenziali in Oncologia di Reggio Emilia, Physical Medicine and Rehabilitation Unit</p> <p>Bedogni, Ginevra; Azienda Unità Sanitaria Locale - IRCCS Tecnologie Avanzate e Modelli Assistenziali in Oncologia di Reggio Emilia, Physical Medicine and Rehabilitation Unit</p> <p>Ghizzoni, Daniele; Private Hospital Villa Verde Srl, Physiotherapy Service</p> <p>Bertolini, Anna; Bachelor' degree in OT , Department of Medical and Sugical Sciences;University of Modena e Reggio</p> <p>Esseroukh, Otmen; Bachelor's degree PT, Department of Surgery, Medicine, DentristY and Morphological Sciences; University of Modena e Reggio Emilia</p> <p>Gualdi, Cecilia; Bachelor's degree PT, Department of Surgery, Medicine, DentristY and Morphological Sciences; University of Modena e Reggio Emilia</p> <p>Schiavi, Margherita; Azienda USL - IRCCS di Reggio Emilia, Department of Health Professions</p> <p>Braglia, Luca; Azienda USL - IRCCS di Reggio Emilia, Research and Statistic Infrastructure</p> <p>Costi, Stefania; Azienda USL - IRCCS di Reggio Emilia, Scientific Directorate; Bachelor' degree in OT , Department of Medical and Sugical Sciences;University of Modena e Reggio</p> |
| Keywords:                     | COVID-19, REHABILITATION MEDICINE, Respiratory infections < THORACIC MEDICINE                                                                                                                                                                                                                                                                                                                                                                                                                                                                                                                                                                                                                                                                                                                                                                                                                                                                                                                                                                                                                                                                                                                                                                                                                                                                                                                                                                                                                                                                                                                                                                                                                                                                                                             |
|                               |                                                                                                                                                                                                                                                                                                                                                                                                                                                                                                                                                                                                                                                                                                                                                                                                                                                                                                                                                                                                                                                                                                                                                                                                                                                                                                                                                                                                                                                                                                                                                                                                                                                                                                                                                                                           |

SCHOLARONE™  
Manuscripts

1  
2  
3  
4  
5  
6  
7  
8  
9  
10  
11  
12  
13  
14  
15  
16  
17  
18  
19  
20  
21  
22  
23  
24  
25  
26  
27  
28  
29  
30  
31  
32  
33  
34  
35  
36  
37  
38  
39  
40  
41  
42  
43  
44  
45  
46  
47  
48  
49  
50  
51  
52  
53  
54  
55  
56  
57  
58  
59  
60

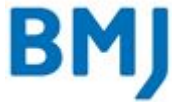

I, the Submitting Author has the right to grant and does grant on behalf of all authors of the Work (as defined in the below author licence), an exclusive licence and/or a non-exclusive licence for contributions from authors who are: i) UK Crown employees; ii) where BMJ has agreed a CC-BY licence shall apply, and/or iii) in accordance with the terms applicable for US Federal Government officers or employees acting as part of their official duties; on a worldwide, perpetual, irrevocable, royalty-free basis to BMJ Publishing Group Ltd ("BMJ") its licensees and where the relevant Journal is co-owned by BMJ to the co-owners of the Journal, to publish the Work in this journal and any other BMJ products and to exploit all rights, as set out in our [licence](#).

The Submitting Author accepts and understands that any supply made under these terms is made by BMJ to the Submitting Author unless you are acting as an employee on behalf of your employer or a postgraduate student of an affiliated institution which is paying any applicable article publishing charge ("APC") for Open Access articles. Where the Submitting Author wishes to make the Work available on an Open Access basis (and intends to pay the relevant APC), the terms of reuse of such Open Access shall be governed by a Creative Commons licence – details of these licences and which [Creative Commons](#) licence will apply to this Work are set out in our licence referred to above.

Other than as permitted in any relevant BMJ Author's Self Archiving Policies, I confirm this Work has not been accepted for publication elsewhere, is not being considered for publication elsewhere and does not duplicate material already published. I confirm all authors consent to publication of this Work and authorise the granting of this licence.

## Title page

**Sex Differences and Rehabilitation Needs after Hospital Discharge for COVID-19: An Italian Cross-sectional Study.**

Stefania FUGAZZARO<sup>a</sup> MD, Monica DENTI<sup>a</sup> PT, Carlotta MAININI<sup>a</sup> PT, Monia Allisen ACCOGLI<sup>a</sup> PT, Ginevra BEDOGNI<sup>a</sup> MD, Daniele GHIZZONI<sup>b</sup> MD, Anna BERTOLINI<sup>c</sup> OT, Otmen ESSEROUKH<sup>d</sup> PT, Cecilia GUALDI<sup>d</sup> PT, Margherita SCHIAVI<sup>e</sup> OT, Luca BRAGLIA<sup>f</sup> MSc, Stefania COSTI<sup>d,g</sup> PhD

<sup>a</sup> Physical Medicine and Rehabilitation Unit, Azienda Unità Sanitaria Locale - IRCCS di Reggio Emilia, Viale Risorgimento n°80, 42123 Reggio Emilia, Italy;

<sup>b</sup> Physiotherapy Service, Casa di Cura Villa Verde, Viale Lelio Basso n° 1, 42124 Reggio Emilia, Italy;

<sup>c</sup> Bachelor's degree program in OT, Department of Medical and Surgical Sciences, University of Modena Reggio Emilia, Modena, Via del Pozzo n° 71, 41124, Italy.

<sup>d</sup> Bachelor's degree program in PT, Department of Surgery, Medicine, Dentistry and Morphological Sciences, University of Modena and Reggio Emilia, Via del Pozzo n° 71, 41124 Modena, Italy;

<sup>e</sup> Department of Health Professions, Azienda Unità Sanitaria Locale - IRCCS di Reggio Emilia, Via Amendola n° 2, Reggio Emilia, Italy

<sup>f</sup> Research and Statistic Infrastructure, Azienda Unità Sanitaria Locale – IRCCS Reggio Emilia, Viale Umberto I n°50, Reggio Emilia, Italy

<sup>g</sup> Scientific Directorate, Azienda Unità Sanitaria Locale - IRCCS di Reggio Emilia, Viale Umberto I n°50, 42123 Reggio Emilia, Italy;

Corresponding author:

Monica Denti, Physical Medicine and Rehabilitation Unit, Azienda Unità Sanitaria Locale-IRCCS di Reggio Emilia, Viale Risorgimento n° 80, 42123 Reggio Emilia, Italy;

E-mail: monica.denti@ausl.re.it

ORCID = <https://orcid.org/0000-0001-6541-2696>

Word count: 3094 words of text.

## Abstract

**Objectives:** COVID-19 can result in persistent symptoms leaving potential rehabilitation needs unmet. This study aims to describe persistent symptoms and health status of individuals hospitalized for COVID-19 according to the ICF domains of impairments, limitations in activity, and participation restrictions.

**Design:** Cross-sectional study consisting in a telephone interview three months after hospital discharge.

**Setting:** This study was conducted during the first peak of the COVID-19 pandemic by the Local Health Authority of Reggio Emilia (Italy).

**Participants:** Adult individuals discharged from hospital between April and June 2020 after COVID-19. Exclusion criteria: hospitalization for reasons other than COVID-19, inability to participate in the study, concomitant acute or chronic conditions causing disability.

**Primary and secondary outcome measures:** We assessed: dyspnea (Medical Research Council), fatigue (Fatigue Severity Scale), mood disturbances (Hospital Anxiety and Depression Scale), limitations in activity (Barthel Index) and participation restrictions (Reintegration to Normal Living Index). We also collected data on sociodemographic characteristics, health status prior to COVID-19, COVID-related clinical manifestations and hospital care pathway up to discharge, rehabilitation interventions, accidental falls and emergency room access.

**Results:** 149 participants (men, 62%; average age 62 ( $\pm 11$ ) years) were enrolled, 35 of which (23%) were admitted to the ICU while hospitalized. Three months after hospital discharge, almost half of the participants still suffered from dyspnea and fatigue. Individuals recovered a good level of independence in activity of daily living, but 76% still suffered participation restrictions. Female sex was significantly associated with worse outcomes for all symptoms.

**Conclusions:** Individuals who had moderate or severe COVID-19 may perceive persistent symptoms which may result in reduced social participation. Sex differences should be monitored, as women may recover more slowly than men.

**Trial Registration:** This independent observational study was registered on ClinicalTrials.com (NCT04438239).

**Key Words:** COVID-19, rehabilitation medicine, respiratory infections.

1  
2  
3  
4  
5  
6  
7  
8  
9  
10  
11  
12  
13  
14  
15  
16  
17  
18  
19  
20  
21  
22  
23  
24  
25  
26  
27  
28  
29  
30  
31  
32  
33  
34  
35  
36  
37  
38  
39  
40  
41  
42  
43  
44  
45  
46  
47  
48  
49  
50  
51  
52  
53  
54  
55  
56  
57  
58  
59  
60

## Article Summary

- This cross-sectional study investigated the long-term impact of COVID-19 on functional status of patients after hospital discharge.
- The telephone interviews collected data of patients discharged from the hospitals of the Local Health Authority of the Province of Reggio Emilia (Italy) only.
- To catch post-acute sequelae of SARS-COV2 infection, individuals with acute or chronic concomitant conditions causing disability and with previous complete dependence in activities of daily living (ADLs) were excluded.
- Eligible individuals were contacted by a letter of invitation and, if necessary, also by phone.
- Sociodemographic characteristics, health status prior to COVID-19, data regarding COVID-related hospital care and long-term health outcomes were collected.

## Introduction

### Background

The onset of the coronavirus disease 2019 (COVID-19) pandemic in early 2020 had a tremendous impact on the world population and on healthcare systems, with more than 140.332.386 total confirmed cases worldwide as of April 18, 2021.<sup>1</sup> Early reports about surveillance were promptly released, and a tremendous effort was made to increase knowledge of diffusion patterns and prevention strategies. The presenting features of SARS-CoV-2 infection have been well described, with a widely accepted categorization of acute COVID-19 published by the WHO<sup>2</sup> and updated regularly. According to the WHO classification of COVID-19, which includes asymptomatic, mild, moderate, severe, and critical disease (WHO 2021),<sup>2</sup> 14-15% of cases have been severe and 5% critical.<sup>3</sup> However, for the first months of the pandemic, the long-term impact of the disease remained underexplored.

COVID-19 patients admitted to hospital experience fever, cough, dyspnea, muscle soreness, and/or acute respiratory distress syndrome, but also fatigue, gastrointestinal symptoms, and headache.<sup>4</sup> While most patients recover quickly, a growing number of studies have highlighted that several survivors of COVID-19 experience a multisystem condition termed post-acute sequelae of SARS-CoV-2 infection (PASC) characterized by fatigue, dyspnea, brain fog, headache, mood disturbances, and atypical chest pain.<sup>5</sup> These symptoms can last several weeks after the acute phase of the disease<sup>6-12</sup> and may impact an individual's functional status and quality of life. Further, in the presence of comorbidities, they may lead to deconditioning, fatigue, and social isolation.<sup>13</sup>

To our knowledge, no clinical trial has comprehensively assessed the persistent impact of COVID-19 according to the International Classification of Functioning, Disability and Health (ICF),<sup>14</sup> which has been recommended to explore the long-term impairments but also limitations in activity and participation restrictions caused by SARS-CoV-2 infection.<sup>6</sup> This study aimed to verify whether individuals who had been hospitalized for COVID-19 had unmet rehabilitation needs lasting long beyond recovery.

### Objective

This study describes the persistent symptoms and impairments, limitations in activity, and restrictions in participation in social activities of those individuals who required hospitalization for COVID-19. It investigated the associations between sociodemographic characteristics, health status prior to COVID-19, COVID-related clinical manifestations and symptoms, and hospital care pathway up to discharge and health outcomes assessed three months after hospital discharge.

## Methods

### *Study design and population*



1  
2  
3 This cross-sectional study is reported according to the STROBE guidelines.<sup>15</sup> The study consisted in  
4 a telephone interview of patients hospitalized for COVID-19 during the first peak of the pandemic  
5 to collect current and retrospective data. All adult symptomatic individuals, discharged from the  
6 hospitals of the Local Health Authority of the Province of Reggio Emilia (Italy) between April and  
7 June 2020, were screened for eligibility by medical documentation. Excluded were individuals  
8 hospitalized for reasons other than COVID-19, unable to participate in the study procedures (e.g.,  
9 dementia, psychiatric disorders, linguistic barriers, etc.), with acute or chronic concomitant  
10 conditions causing disability (e.g., recent stroke, surgical interventions, heart failure, etc.), and  
11 individuals with previous complete dependence in activities of daily living (ADLs). The study was  
12 approved by the local Ethics Committee (prot. 2020/0133, April 21, 2020).  
13  
14  
15  
16  
17

18 All eligible individuals were sent a letter of invitation to participate in this study, written  
19 information about the study, and a consent form. The letter included the principal investigator's  
20 request for permission for a researcher affiliated with the study (physician, physiotherapist, or  
21 occupational therapist) to contact the individual by phone. Two weeks after the letter was sent,  
22 the potentially eligible individuals were contacted by a researcher, who gave them any further  
23 information requested, and asked that they return the written informed consent to participate in  
24 the interview. Individuals who did not answer the phone after three attempts and those who  
25 explicitly stated they did not intend to participate in the study were deleted from the list.  
26  
27  
28  
29

30 The medical records of each consenting participant were retrospectively reviewed to collect data  
31 on potential exposures, i.e., sociodemographic characteristics (age, sex, household composition)  
32 and health status prior to COVID-19 (comorbidities, use of aids, and level of independence prior to  
33 hospitalization). We also collected data regarding COVID-related hospital care, the symptoms and  
34 clinical manifestation of COVID-19 (e.g., cough, fever, diarrhea, asthenia, localization of  
35 pneumonia, respiratory failure), admission to the intensive care unit (ICU) and its duration, any  
36 rehabilitation treatment during hospitalization (e.g., mobilization, chest physiotherapy), and  
37 length of stay (LOS).  
38  
39  
40  
41

42 Three months after hospital discharge, data regarding long-term health outcomes were collected  
43 through a telephone interview, which consisted in the assessment of persistent symptoms and  
44 impairments: dyspnea was assessed through the Medical Research Council (MRC) scale,<sup>16</sup> fatigue  
45 through the Fatigue Severity Scale (FSS),<sup>17</sup> and mood disturbances were assessed through the  
46 Hospital Anxiety and Depression Scale (HADS).<sup>18</sup> Data were also collected on limitations in basic  
47 activities of daily living (B-ADL) using the Barthel Index (BI)<sup>19</sup> and on restrictions in participation  
48 using the Italian version of the Reintegration to Normal Living Index (RNLI).<sup>20</sup> Data on any  
49 rehabilitation intervention implemented after hospital discharge (type, duration, frequency) and  
50 on any accidental falls and related consequences, emergency room access, or any further hospital  
51 admissions after hospital discharge were also collected.  
52  
53  
54  
55

56 Furthermore, qualitative data were explored through open-ended questions on the patient's  
57 recovery from COVID-19. The reporting of these qualitative data is currently underway.  
58  
59  
60

### *Statistical analysis*

1  
2  
3 In absence of an a priori hypothesis, given the exploratory nature of the study, no formal sample  
4 size calculation was performed; all eligible individuals who agreed to participate in the study were  
5 recruited. Sociodemographic characteristics, health status prior to COVID-19, COVID-related  
6 clinical manifestations and symptoms, and hospital care pathway up to discharge are reported, as  
7 are the data on long-term outcomes of COVID-19. Data are reported as frequency and percentage  
8 for categorical variables, mean and standard deviation for symmetric quantitative variables, and  
9 median and IQR for skewed variables.  
10  
11  
12

13  
14 Proportions between groups were compared using the chi-square test or the Fisher's exact test.  
15 Associations between potential exposures and long-term outcomes were investigated using  
16 logistic regression models. Similarly, associations between the presence of long-term outcomes of  
17 COVID-19 and rehabilitation interventions, accidental falls/fractures, emergency room accesses,  
18 and/ or any hospital admission in the three months following hospital discharge were investigated.  
19 Unless otherwise specified, confidence intervals are two-tailed and calculated at the 0.95  
20 confidence level. Tests were considered statistically significant when the P value was < 0.05.  
21 Statistical analysis was performed using R 3.5.2 R Core Team 2020.<sup>21</sup>  
22  
23  
24

## 25 26 **Results**

### 27 *Participants*

28  
29  
30  
31 Between April and June 2020, 784 patients were discharged from the hospitals of the LHA of  
32 Reggio Emilia (Italy), which serves a population of 533 158 residents, after having recovered from  
33 COVID-19. Overall, 446 of these patients were excluded for the following reasons: incomplete  
34 medical records, thus not permitting the eligibility screening (21), presence of acute or chronic  
35 conditions causing disability other than COVID-19 (339), and inability to participate in the study  
36 (56). Five pregnant women were also excluded, as were 25 individuals who were discharged to a  
37 COVID-19 residential facility. Thus, 338 invitations to participate in the study were mailed to  
38 potentially eligible individuals, who were contacted by telephone two weeks later; 18 more  
39 individuals were excluded in this phase for inability to participate in the interview (language  
40 barrier, cognitive impairment, severe hearing loss, aphasia). Ninety-five individuals refused to  
41 participate and 75 could not be reached by phone, despite repeated attempts. Overall, 150  
42 individuals consented to participate, and a telephone appointment for the interview was set up.  
43 One individual could not be reached for the interview, and his data were excluded from the  
44 analysis. Thus, 149 participants were interviewed between June and September 2020, at an  
45 average of 104 days ( $\pm 18.5$ ) from hospital discharge. Figure 1 reports the flow diagram of the  
46 study participants.  
47  
48  
49  
50  
51  
52  
53  
54  
55  
56  
57  
58  
59  
60

**Figure 1.** Flow diagram of the study participants.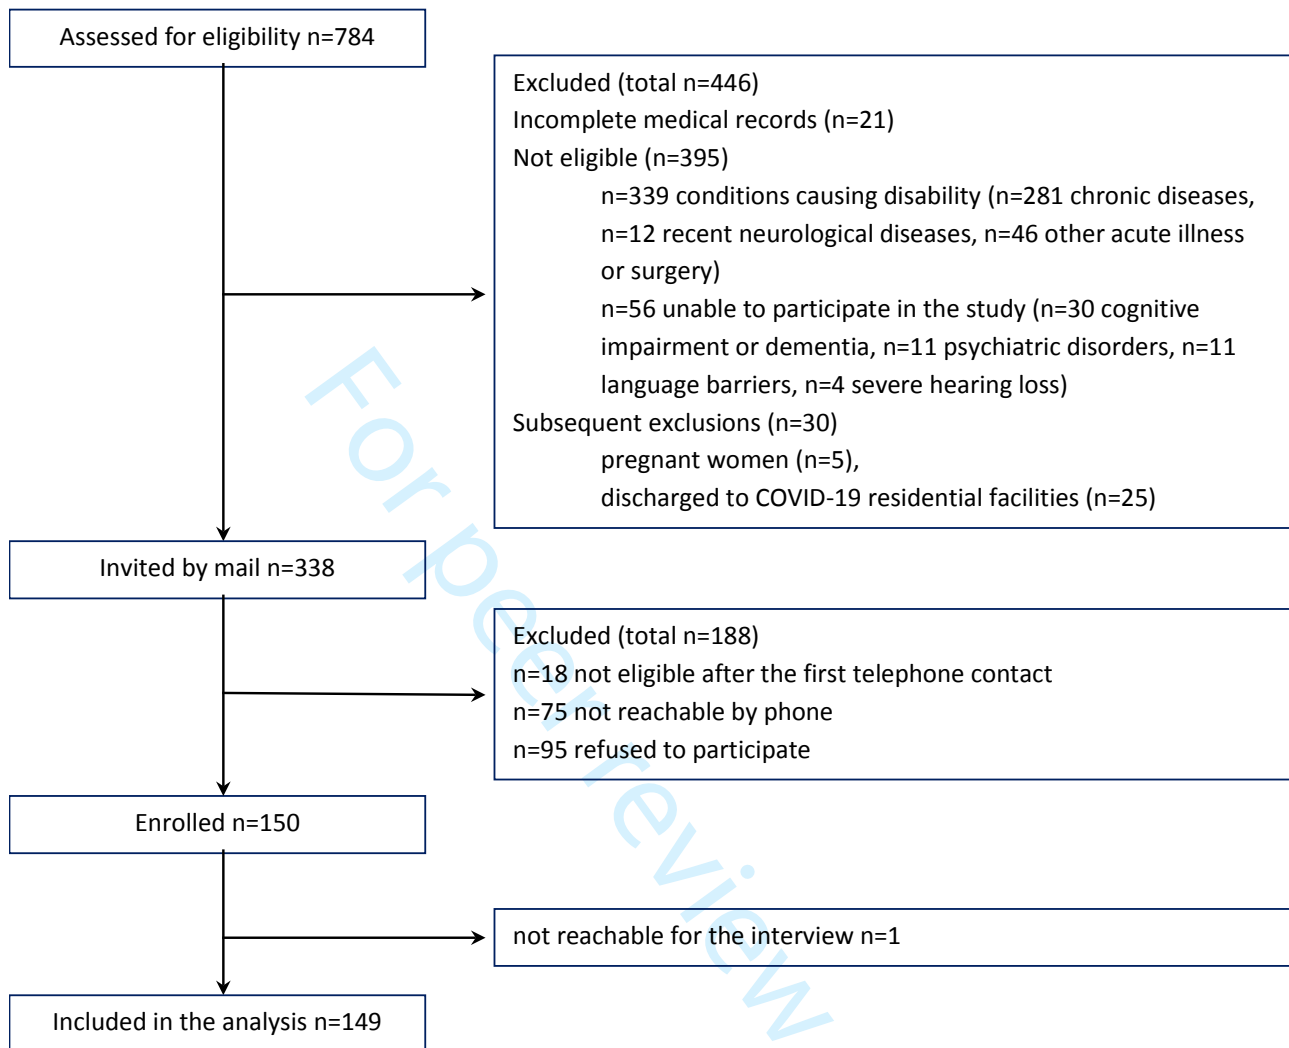

### Descriptive data

The sociodemographic characteristics and health status of study participants are reported in Table 1.

**Table 1.** Socio-demographic characteristics and health status of the cohort

| Socio-demographic characteristics and health status | TOTAL (N=149) |
|-----------------------------------------------------|---------------|
| Age, mean (SD)                                      | 62(±11.5)     |
| Gender, N (%)                                       |               |
| Male                                                | 93 (62.4)     |
| Female                                              | 56 (37.6)     |
| Household conditions, N (%)                         |               |
| Alone                                               | 15 (10.0)     |
| With others                                         | 133 (89.3)    |

|                                                                   |            |
|-------------------------------------------------------------------|------------|
| Data missing                                                      | 1 (0.7)    |
| Occupation, N (%)                                                 |            |
| Employed                                                          | 76 (51.0)  |
| Retired                                                           | 66 (44.3)  |
| Unemployed                                                        | 7 (4.7)    |
| Smoker, N (%)                                                     |            |
| Yes                                                               | 11 (7.4)   |
| No                                                                | 92 (61.7)  |
| Ex-smoker                                                         | 46 (30.9)  |
| Comorbidities, N (%)                                              |            |
| No                                                                | 26 (17.4)  |
| Yes                                                               | 123 (82.6) |
| N° of comorbidities per patient, N (%)                            |            |
| 0                                                                 | 26 (17.4)  |
| 1                                                                 | 43 (28.9)  |
| 2                                                                 | 39 (26.2)  |
| 3                                                                 | 23 (15.4)  |
| >3                                                                | 18 (12.1)  |
| Type of comorbidities, N (%), (Total N=263)                       |            |
| Cardiovascular diseases                                           | 91 (34.6)  |
| Metabolic diseases (dyslipidemia, gout, fatty liver disease, etc) | 41 (15.6)  |
| Diabetes                                                          | 23 (8.7)   |
| Obesity (BMI $\geq$ 30)                                           | 21 (8.0)   |
| Digestive system diseases                                         | 16 (6.1)   |
| Respiratory diseases                                              | 10 (3.8)   |
| Hematological diseases                                            | 8 (3.0)    |
| Rheumatological diseases                                          | 8 (3.0)    |
| Others                                                            | 45(17.1)   |
| Independence before hospital admission, N (%)                     |            |
| Yes                                                               | 148 (99.3) |
| Need little help for ADL                                          | 1 (0.7)    |
| Use of aids before hospital admission, N (%)                      |            |
| Yes                                                               | 9 (6.0)    |
| No                                                                | 140 (94.0) |

The average age of the study cohort was 62 ( $\pm$ 11) years. Males accounted for 62.4% of the sample, and 51% were employed. Most participants lived with family members (89.3%) and had one or more comorbidities (82.6%), the most frequent being cardiovascular diseases (34.6%), metabolic diseases (15.6%), diabetes (8.7%), and obesity (8%). Other comorbidities included diseases of the digestive or respiratory systems (6.1% and 3.8%, respectively), hematological or rheumatological diseases (3% each); less frequent comorbidities included cancer, musculoskeletal diseases, and urogenital diseases (2.7% each), kidney and neurological diseases and psychiatric disorders (2.3% each), immune deficiencies (0.4%), and other (1.9%).

Before hospitalization for COVID-19, all participants were independent in B-ADL, and only 6% used walking aids for mobility.

Table 2 reports data regarding the hospital care of participants, showing intensive care unit (ICU) admissions and sex-disaggregated data.

**Table 2.** Hospital care of participants and post-discharge period.

| Information about patients' hospital care and post-discharge            |            |                    |             | Sex-disaggregated data             |                                   |
|-------------------------------------------------------------------------|------------|--------------------|-------------|------------------------------------|-----------------------------------|
|                                                                         | TOTAL      | ICU <sup>(a)</sup> | Not-ICU     | Male (N=93)                        | Female (N=56)                     |
| Hospital care, N (%)                                                    | 149 (100%) | 35 (23.5%)         | 114 (76.5%) | ICU 26 (28.0)<br>Not-ICU 67 (72.0) | ICU 9 (16.1)<br>Not-ICU 47 (83.9) |
| LOS TOT, mean (SD)                                                      | 18 (±14)   | 33 (±20)           | 14 (±8)     | 18.7 (±13.9)                       | 17.4 (±15.4)                      |
| LOS <sup>(b)</sup> in ICU, mean (SD)                                    |            | 14 (±11)           |             | 13.2 (±10.8)                       | 16.1 (±13.8)                      |
| Symptoms at admission, N (%)                                            |            |                    |             |                                    |                                   |
| Respiratory failure                                                     | 125 (83.9) | 35 (100)           | 90 (78.9)   | 80 (86.0)                          | 46 (82.1)                         |
| Bilateral pneumonia                                                     | 18 (12.1)  | 0 (0)              | 18 (15.8)   | 11 (11.8)                          | 7 (12.5)                          |
| Mild symptoms                                                           | 4 (2.7)    | 0 (0)              | 4 (3.5)     | 2 (2.2)                            | 2 (3.6)                           |
| Other (pulmonary embolism)                                              | 2 (1.3)    | 0 (0)              | 2 (1.8)     | 0 (0)                              | 1 (1.8)                           |
| Clinical Category of COVID-19 and Type of Oxygen support, N (%)         |            |                    |             |                                    |                                   |
| Critical COVID-19 (CPAP <sup>(c)</sup> -NIV <sup>(d)</sup> -intubation) | 56 (37.6)  | 35 (100)           | 21 (18.4)   | 43 (46.2)                          | 13 (23.2)                         |
| Severe COVID-19 (HF <sup>(e)</sup> oxygen devices)                      | 61 (40.9)  | 0 (0)              | 61 (53.6)   | 33 (35.5)                          | 28 (50.0)                         |
| Moderate COVID-19 (LF <sup>(f)</sup> oxygen devices)                    | 16 (10.7)  | 0 (0)              | 16 (14.0)   | 9 (9.7)                            | 7 (12.5)                          |
| Mild COVID-19 (no oxygen support)                                       | 16 (10.7)  | 0 (0)              | 16 (14.0)   | 8 (8.6)                            | 8 (14.3)                          |
| Rehabilitation during hospitalization, N (%)                            |            |                    |             |                                    |                                   |
| No                                                                      | 128 (85.9) | 17 (48.6)          | 111 (97.4)  | 81 (87.1)                          | 47 (83.9)                         |
| Yes                                                                     | 21 (14.1)  | 18 (51.4)          | 3 (2.6)     | 12 (12.9)                          | 9 (16.1)                          |
| Rehabilitation after discharge, N (%)                                   |            |                    |             |                                    |                                   |
| No                                                                      | 128 (85.9) | 21 (60.0)          | 107 (93.9)  | 80 (86.0)                          | 48 (85.7)                         |
| Yes                                                                     | 21 (14.1)  | 14 (40.0)          | 7 (6.1)     | 13 (14.0)                          | 8 (14.3)                          |
| Use of aids after discharge, N (%)                                      |            |                    |             |                                    |                                   |
| No                                                                      | 132 (88.6) | 26 (74.3)          | 106 (93.0)  | 85 (91.4)                          | 47 (83.9)                         |
| Yes                                                                     | 17 (11.4)  | 9 (25.7)           | 8 (7.0)     | 8 (8.6)                            | 9 (16.1)                          |
| Accidental falls after discharge, N (%)                                 |            |                    |             |                                    |                                   |
| No                                                                      | 139 (93.3) | 32 (91.4)          | 107 (93.9)  | 88 (94.6)                          | 51 (91.1)                         |
| Yes                                                                     | 10 (6.7)   | 3 (8.6)            | 7 (6.1)     | 5 (5.4)                            | 5 (8.9)                           |

Legend: <sup>(a)</sup> ICU = Intensive Care Unit; <sup>(b)</sup> LOS= Length Of Stay; <sup>(c)</sup> CPAP = Continuous Positive Airway Pressure; <sup>(d)</sup> NIV = Non-Invasive Ventilation; <sup>(e)</sup> HF = High Flow; <sup>(f)</sup> LF = Low Flow.

Thirty-five individuals (23.5%) were admitted to the ICU. Overall, the average LOS was 18 (±14) days, with a higher average LOS for individuals admitted to the ICU (33 ±20 days).

Most participants experienced respiratory failure (83.9%), with 12.1% having documented bilateral pneumonia. Accordingly, 37.6% of participants were in critical condition and needed respiratory assistance by means of continuous positive airway pressure, non-invasive ventilation, or

intubation, while 40.9% needed high-flow oxygen therapy. Only 10.7% needed low-flow oxygen support, and an equal proportion did not need any respiratory support at all.

Inpatient rehabilitation was delivered to 21 individuals, corresponding to 14.1% of the total sample and to 51.4% of participants admitted to the ICU. Similarly, outpatient rehabilitation after hospital discharge was attended by 21 individuals (14.1%), several of whom had been admitted to the ICU (40.0%). In most cases, rehabilitation programs included pulmonary rehabilitation, mobilization, counselling, and exercises.

Seventeen participants (11.4%) reported using a walking aid for mobility after hospital discharge (wheelchair, walker, stick, crutches). Moreover, accidental falls after hospital discharge were reported by 6.7% of participants, but only one resulted in emergency room access.

### Outcome data

Table 3 describes the persistent symptoms, limitations in activity, and restrictions in participation three months after hospital discharge.

**Table 3.** Persistent symptoms, limitations in activity and restrictions in participation three months after hospital discharge

| Outcome                                    | Male (=93) | Female (=56) | Total (=149) |
|--------------------------------------------|------------|--------------|--------------|
| Dyspnea, N (%)                             |            |              |              |
| Absent (MRC=0)                             | 59 (63.4)  | 24 (42.9)    | 83 (55.7)    |
| Mild (MRC =1)                              | 26 (28.0)  | 17 (30.3)    | 43 (28.9)    |
| Moderate (MRC =2-3)                        | 6 (6.4)    | 13 (23.2)    | 19 (12.8)    |
| Severe (MRC =4)                            | 1 (1.1)    | 1 (1.8)      | 2 (1.3)      |
| Data missing <sup>(a)</sup>                | 1 (1.1)    | 1 (1.8)      | 2 (1.3)      |
| Fatigue, n (%)                             |            |              |              |
| Absent (FSS=9)                             | 13 (14.0)  | 3 (5.4)      | 16 (10.7)    |
| Mild-moderate (FSS 10-36)                  | 54 (58.0)  | 19 (33.9)    | 73 (49.0)    |
| Severe (FSS >36)                           | 25 (26.9)  | 33 (58.9)    | 58 (38.9)    |
| Data missing <sup>(a)</sup>                | 1 (1.1)    | 1 (1.8)      | 2 (1.3)      |
| Anxiety, N (%)                             |            |              |              |
| No (HADS-a score<8)                        | 76 (81.7)  | 35 (62.5)    | 111 (74.5)   |
| Yes (HADS-a score≥8)                       | 16 (17.2)  | 21 (37.5)    | 37 (24.8)    |
| Data missing <sup>(a)</sup>                | 1 (1.1)    | 0 (0.0)      | 1 (0.7)      |
| Depression, N (%)                          |            |              |              |
| No (HADS-d score<8)                        | 84 (90.3)  | 40 (71.4)    | 124 (83.2)   |
| Yes (HADS-d score≥8)                       | 8 (8.6)    | 16 (28.6)    | 24 (16.1)    |
| Data missing <sup>(a)</sup>                | 1 (1.1)    | 0 (0.0)      | 1 (0.7)      |
| Limitation in B-ADL <sup>(b)</sup> , N (%) |            |              |              |
| Independent (BI score=100)                 | 88 (94.6)  | 48 (85.7)    | 136 (91.3)   |
| Mild dependence (BI 91-99)                 | 2 (2.2)    | 5 (8.9)      | 7 (4.7)      |

|                                    |           |           |            |
|------------------------------------|-----------|-----------|------------|
| Moderate dependence (BI 61-90)     | 2 (2.2)   | 2 (3.6)   | 4 (2.7)    |
| Severe dependence (BI 21-60)       | 0 (0.0)   | 0 (0.0)   | 0 (0.0)    |
| Complete dependence (BI 0-20)      | 0 (0.0)   | 0 (0.0)   | 0 (0.0)    |
| Data missing <sup>(a)</sup>        | 1 (1.1)   | 1 (1.8)   | 2 (1.3)    |
| Participation, N (%)               |           |           |            |
| Complete reintegration (RNLI=100)  | 32 (34.4) | 4 (7.1)   | 36 (24.2)  |
| Reduced reintegration (RNLI 60-99) | 55 (59.1) | 45 (80.4) | 100 (67.1) |
| Poor reintegration (RNLI <60)      | 5 (5.4)   | 7 (12.5)  | 12 (8.0)   |
| Data missing(a)                    | 1 (1.1)   | 0 (0.0)   | 1 (0.7)    |

Legend: <sup>(a)</sup> impossibility of administering the assessments due to difficulties in understanding the questions during the phone call on behalf of the participant; <sup>(b)</sup> B-ADL = Basic Activities of Daily Living.

Fatigue and dyspnea were the most prevalent persistent symptoms in the cohort investigated: 87.9% of participants experienced fatigue and 43% suffered from mild to severe dyspnea. Clinically relevant anxiety and depression scores (HADS  $\geq 8$ ) were detected in 24.8% and 16.1% of participants, respectively.

Most of the sample (91.3%) was completely independent, with only a few individuals (11) reporting need for assistance in B-ADL. Nevertheless, three months after discharge, only 24.2% of participants were completely reintegrated, while 75.1% reported moderate (RNLI 60-99) or even severe (RNLI <60) restrictions in participation (67.1% and 8.0%, respectively).

Table 4 shows the odds ratios (OR) of the associations between potential exposures and outcomes three months after discharge.

**Table 4.** Associations between potential exposures and outcomes three months after discharge.

| Risk factors               | Dyspnea<br>OR <sup>(a)</sup> [CI] <sup>(b)</sup> | Fatigue<br>OR (P-value)   | Anxiety<br>OR (P-value)    | Depression<br>OR (P-value) | Dependence<br>in B-ADL <sup>(c)</sup><br>OR (P-value) | Reintegration<br>OR (p-value) |
|----------------------------|--------------------------------------------------|---------------------------|----------------------------|----------------------------|-------------------------------------------------------|-------------------------------|
| Age                        | 1.00 [0.96-1.05] p=0.806                         | 0.97 [0.93-1.00] p=0.087  | 0.94 [0.90-0.98] p=0.006*  | 0.95 [0.90-0.99] p=0.036*  | 1.05 [0.99-1.12] p=(0.119)                            | 0.95 [0.88-1.00] p=0.102      |
| Female sex                 | 3.61 [1.26-11.26] p=0.019*                       | 3.75 [1.75-8.26] p<0.001* | 3.26 [1.40-7.81] p= 0.007* | 3.71 [1.39-10.69] p=0.011* | 3.18 [0.90-12.79] p=0.078                             | 2.59 [0.70-10.66] p=0.157     |
| Several comorbidities (>3) | 1.03 [0.20-4.26] p=0.970                         | 0.92 [0.29-1.47] p=0.883  | 1.26 [0.34-4.34] p= 0.709  | 0.30 [0.01-1.89] p=0.281   | 0.57 [0.02-4.24] p=0.630                              | 2.66 [0.45-15.85] p=0.260     |
| Diabetes                   | 1.57 [0.40-5.09] p=0.471                         | 0.98 [0.37-2.48] p=0.965  | 0.88 [0.26-2.49] p=0.823   | 0.45 [0.06-1.76] p=0.317   | 3.12 [0.75-11.57] p=0.094                             | 0.48 [0.02-2.77] p=0.499      |
| Cardiovascular diseases    | 1.80 [0.54-8.23] p=0.380                         | 0.73 [0.32-1.66] p=0.458  | 0.62 [0.25-1.58] p=0.311   | 0.79 [0.28-2.44] p=0.675   | 0.60 [0.16-2.42] p=0.438                              | 1.46 [0.34-10.06] p=0.642     |
| Obesity                    | 1.57 [0.40-                                      | 1.36 [0.52-               | 0.67 [0.18-                | 0.82 [1.17-                | 1.06 [0.15-                                           | 2.23 [0.45-                   |

|                                       |                            |                           |                           |                          |                            |                          |
|---------------------------------------|----------------------------|---------------------------|---------------------------|--------------------------|----------------------------|--------------------------|
| (BMI <sup>(d)</sup> ≥30)              | 5.09] p=0.471              | 3.53] p=0.520             | 2.03] p=0.519             | 2.78] p=0.775            | 4.55] p=0.940              | 8.91] p=0.274            |
| Critical or severe COVID-19           | 0.80 [0.26-2.28] p=0.691   | 0.70 [0.32-1.48] p=0.360  | 0.29 [0.10-0.75] p=0.016* | 0.33 [0.90-0.97] p=0.062 | 1.29 [0.35-4.56] p=0.681   | 1.03 [0.25-3.81] p=0.965 |
| Use of walking aids after discharge   | 3.52 [0.97-11.62] p=0.042* | 2.38 [0.79-7.56] p=0.124  | 2.05 [0.64-6.12] p=0.205  | 0.69 [0.10-2.79] p=0.653 | 2.79 [0.56-11.14] p=0.164  | 0.71 [0.03-4.24] p=0.762 |
| Accidental falls after discharge      | 5.02 [1.16-20.10] p=0.023* | 2.28 [0.61-9.37] p=0.220  | 3.48 [0.90-13.46] p=0.063 | 2.39 [0.48-9.58] p=0.237 | 5.51 [1.04-24.56] p=0.029* | 1.27 [0.06-8.00] p=0.829 |
| Rehabilitation during hospitalization | 3.01 [0.59-13.69] p=0.158  | 3.40 [0.97-13.89] p=0.064 | 0.43 [0.07-1.86] p=0.298  | 0.64 [0.07-3.40] p=0.639 | 4.12 [0.64-22.75] p=0.114  | 0.66 [0.02-5.60] p=0.751 |

Legend: <sup>(a)</sup> OR = Odds Ratio; <sup>(b)</sup> CI = Confidence interval; <sup>(c)</sup> B-ADL = Basic Activities of Daily Living; <sup>(d)</sup> BMI = Body Mass Index; \*statistically significance.

Increasing age seemed to be associated with less anxiety (OR 0.94, P = 0.006), as each year of age seemed to reduce the risk by about 5%. Similar results were detected for depression (OR 0.95, P = 0.036).

Being female was associated with persistent symptoms after COVID-19: three months after hospital discharge, women showed a three to four times higher risk of suffering from dyspnea (OR 3.61, P = 0.019), fatigue (OR 3.75, P < 0.001), anxiety (OR 3.26, P = 0.007), and depression (3.71, P = 0.011) than men; albeit not significantly, limitations in B-ADL were also more reported in females (OR 3.18, P = 0.078).

Surprisingly, comorbidities were not associated with worse outcomes.

Dyspnea was more frequently reported by participants who used walking aids for mobility after discharge (OR 3.52, P = 0.042) and by those who experienced an accidental fall (OR 5.02, P = 0.023).

Moreover, having had critical or severe COVID-19 was associated with a 70% reduction in the risk of anxiety (OR 0.29, P = 0.016) and in the risk of depression, bordering on significance (OR 0.33, P = 0.062).

Finally, accidental falls occurring after hospital discharge were associated with a fivefold increase in the risk of dyspnea (OR 5.02, P = 0.032) and dependence in B-ADL (OR 5.51, P = 0.029).

## Discussion

### *Statement of principal findings*

This study aimed to focus the long-term impact of COVID-19 on functional status of patients after hospital discharge. The results confirm that individuals hospitalized experience persistent symptoms, and adds insight into the impact of COVID-19 on limitations in activities and participation.



1  
2  
3 As millions of individuals are recovering from the infection, it may be appropriate to recognize  
4 those in need of rehabilitation, to help them to recover complete function and previous levels of  
5 participation.  
6

7 Accordingly, the WHO recommends screening COVID-19 patients before hospital discharge to  
8 detect any rehabilitation needs they may have.<sup>2</sup> Reasonably, in the first few months after the  
9 outbreak of the pandemic, the very few studies published on the rehabilitation of patients with  
10 COVID-19 focused on treatment during the acute phase<sup>22,23</sup> or on the implications for health care  
11 organizations.<sup>24,25</sup> More recently, a rapid guideline on the management of the long-term outcomes  
12 of COVID-19 has been published and is now available to clinicians.<sup>26</sup> This guideline recommends a  
13 careful evaluation of symptoms, but also an overall assessment of the impact of the disease on  
14 daily life, including B-ADL, occupations, and social activities .  
15

16 Our study explored all the dimensions of health status by means of valid tools to assess symptoms,  
17 independence in B-ADL, and reintegration to normal living. The data collected seem to confirm  
18 that the likelihood of developing post-COVID-19 syndrome is not linked to the severity of disease,  
19 and also confirm that the most persistent symptoms are fatigue and dyspnea, as previously  
20 detected.<sup>8,9,27</sup>  
21

22 Moreover, in the cohort investigated, clinically relevant anxiety and depression characterized 25%  
23 and 16% of participants respectively, which are proportions very close to those reported in a  
24 similar French cohort.<sup>12</sup> Certainly, mood disorders can also be caused by the extraordinary nature  
25 of the pandemic, which has literally affected the entire planet. In fact, a study conducted on the  
26 healthy population living in the same area as the cohort investigated showed that, during the first  
27 peak of pandemic, mood disturbances were present in 13.6%–54.5% of individuals.<sup>28</sup> Thus,  
28 regardless of their triggers, the prevalence of anxiety and depression during the pandemic seems  
29 higher than the usual estimate (10-11%).<sup>29</sup>  
30

31 Interestingly, despite the large number of patients who claimed complete post-discharge  
32 independence in B-ADL (91.3%), 76% did not recover full social participation three months after  
33 hospital discharge. This finding should not be underestimated, given that social participation is a  
34 domain of health and an indicator of successful aging. In fact, where post-COVID-19 clinics have  
35 been activated, the accurate assessment of limitations in B-ADL and social participation is  
36 considered important by clinicians.<sup>30</sup>  
37

38 Social participation is one of the goals of rehabilitation interventions. However, during the first  
39 pandemic peak, rehabilitation was delivered to a limited number of COVID-19 patients and, in our  
40 cohort, inpatient rehabilitation was mainly provided to patients admitted to an ICU. This is  
41 reasonable, given that the long-term impact of COVID-19 was not known at the time, and directing  
42 all resources to the care of individuals struggling with severe or critical COVID-19 seemed  
43 appropriate, in the attempt to prevent the onset of post-intensive care syndromes, which affect  
44 up to 50% of ICU patients.<sup>31</sup>  
45

46 This may explain why our data do not show a significant association between rehabilitation  
47 interventions and any of the health outcomes assessed three months after hospital discharge.  
48 Rehabilitation was delivered to more severe patients, supporting them in recovering a level of  
49 activity and participation similar to that of individuals with mild or moderate COVID-19, who were  
50 generally not referred to rehabilitation.  
51  
52  
53  
54  
55  
56  
57  
58  
59  
60

1  
2  
3 The most interesting finding of this study is that it seems that the long-term impact of COVID-19 is  
4 worse on women. Since the very first months of the pandemic, the need for sex-disaggregated  
5 data was advocated by researchers,<sup>32,33,34</sup> and the role of sex in the early immune response after  
6 SARS-CoV-2 infection and in mortality has been highlighted.<sup>35,36</sup> While mortality rate for COVID-19  
7 seems higher in men with comorbidities,<sup>37</sup> our results suggest that women may be more frail  
8 several weeks after hospital discharge.  
9  
10

#### 11 *Strengths and weaknesses of the study AND Strengths and weaknesses in relation to other studies*

12  
13 The results of this cross-sectional study should be interpreted with caution, since they originate  
14 from a single Italian province. Recruitment bias cannot be ruled out, as several individuals who  
15 were invited to participate did not adhere to the study (23% of those eligible) or could never be  
16 reached by phone (29%). Moreover, since this study was uncontrolled, we cannot exclude that  
17 some of the persistent symptoms and manifestations might also affect the general population  
18 (e.g., anxiety, participation restrictions) due to the containment measures imposed by the Italian  
19 government. Causal inferencing and generalization of the conclusions are therefore challenging.  
20  
21

22  
23 One strength of this study is that the ICF framework was used to guide data collection, and the  
24 assessment of health status extended beyond impairment. To our knowledge, this is the first study  
25 using this approach. Moreover, a valid assessment of outcomes allowed us to bring out differences  
26 between the sexes in post-COVID-19 syndrome, and, although further exploration is required,  
27 these data suggest that female COVID-19 survivors may need specific follow-up.  
28  
29

#### 30 *Meaning of the study*

31  
32 A current and very lively debate concerns the sequelae of COVID-19 and the most appropriate  
33 definition for this syndrome.<sup>38,39,40</sup> We believe that our data contribute to this debate, as they  
34 highlight that COVID-19 can also affect the social activities of recovered patients, putting their  
35 global health at risk.  
36  
37

38  
39 To our knowledge, this is the first research study highlighting sex differences in post-COVID-19  
40 recover, differences which has been noticed in clinics.<sup>30</sup> These apparent differences merit further  
41 investigation to identify specific rehabilitation needs and to ensure appropriate, tailored  
42 interventions.<sup>34</sup>  
43  
44

#### 45 *Unanswered questions and future research*

46  
47 After hospital discharge, differences between the sexes emerged in the long-term impact of  
48 COVID-19 in this Italian study. These differences should be searched and considered in future  
49 research. Future studies should investigate if tailored rehabilitation is offered and if equity is  
50 warranted in access to care.  
51  
52  
53  
54  
55  
56  
57  
58  
59  
60

## Conclusions

Examining the long-term impact of COVID-19 is essential, given that the number of recovering individuals is growing daily. Healthcare services must implement the best-practice standards of care for individuals with post-COVID-19 syndrome. The results of this study indicate that women may recover more slowly than men. If confirmed, this information may prevent gender inequalities in accessing health services, and facilitate appropriate referral to tailored rehabilitation.

### What is already known on this topic

- Early reports about the presenting features of SARS-COV-2 infection, the diffusion patterns and prevention strategies have been well described and updated regularly.
- To date, no clinical trial has comprehensively assessed the long-term impact of COVID-19 on functional status of patients after hospital discharge;
- The International Classification of Functioning, Disability and Health (ICF) has been recommended to explore the long-term impairments, limitations in activity and participation restrictions caused by SARS-CoV-2 infection.

### What this study adds

- Three months after hospital discharge for COVID-19, individuals still reported moderate to severe fatigue (88%) and dyspnea (44%). They recovered a good level of independence in basic activities of daily living, but 76% still suffered participation restrictions and females showed higher levels of fatigue, dyspnea, anxiety, and depression.
- Our study noticed that differences between the sexes emerged in the long-term impact of COVID-19 and these should be considered when offering tailored rehabilitation and equity in access to care.

**Acknowledgments:** the authors thank Jacqueline M. Costa for the English language editing.

**Competing Interests:** all authors have completed the ICMJE uniform disclosure form at [www.icmje.org/coi\\_disclosure.pdf](http://www.icmje.org/coi_disclosure.pdf) and declare: no support from any organisation for the submitted work; no financial relationships with any organisations that might have an interest in the submitted work in the previous three years; no other relationships or activities that could appear to have influenced the submitted work.

**Contributor and guarantor information:** as dictated by the Authorship guidelines of the International Committee of Medical Journal Editors, all the authors of this manuscript gave substantial contributions to the conception or design of the work or to the acquisition, analysis, or interpretation of data for the work; AND gave substantial contributions to the drafting the work or to its critical revision for important intellectual content; AND approved the final version to be published. All the authors agree to be accountable for all aspects of the work and ensure that

1  
2  
3 questions related to the accuracy or integrity of any part of the work are appropriately  
4 investigated and resolved. This manuscript was completely written by its authors and reviewed in  
5 kind contribution for English language by an editor. The authors did not make use of medical  
6 writers.  
7

8 SF had full access to all the data in the study and take responsibility for the integrity of the data  
9 and the accuracy of the data analysis. LB conducted and is responsible for the data analysis.

10 The corresponding author attests that all listed authors meet authorship criteria and that no  
11 others meeting the criteria have been omitted.  
12

13  
14  
15 **Ethical approval:** This independent study was approved by Provincial Ethics Committee of Reggio  
16 Emilia on 21/04/2020 (ID 2020/0133). All participants provided written informed consent to  
17 participate in the trial.  
18

19  
20  
21 **Transparency statement:** the lead author affirms that the manuscript is an honest, accurate, and  
22 transparent account of the study being reported; no important aspects of the study have been  
23 omitted; any discrepancies from the study as originally planned (and, if relevant, registered) have  
24 been explained.  
25

26  
27  
28 **Data sharing:** Reasonable requests for all of the individual participant data collected during the  
29 trial, after deidentification, should be made to the corresponding author and will be considered by  
30 the REACT lead author. The presented data are anonymised and risk of identification is low.  
31

32  
33  
34 **Patient and public involvement:** it was not appropriate or possible to involve patients or the  
35 public in the design, or conduct, or reporting, or dissemination plans of our research, due to the  
36 circumstances of COVID-19 emergency.  
37

38  
39 **Dissemination declaration:** we planned to disseminate the results to study participants who will  
40 specifically request them via e-mail.  
41

#### 42 43 **License for publication**

44  
45 *"The Corresponding Author has the right to grant on behalf of all authors and does grant on behalf*  
46 *of all authors, a worldwide licence to the Publishers and its licensees in perpetuity, in all forms,*  
47 *formats and media (whether known now or created in the future), to i) publish, reproduce,*  
48 *distribute, display and store the Contribution, ii) translate the Contribution into other languages,*  
49 *create adaptations, reprints, include within collections and create summaries, extracts and/or,*  
50 *abstracts of the Contribution, iii) create any other derivative work(s) based on the Contribution, iv)*  
51 *to exploit all subsidiary rights in the Contribution, v) the inclusion of electronic links from the*  
52 *Contribution to third party material where-ever it may be located; and, vi) licence any third party*  
53 *to do any or all of the above."*  
54  
55  
56  
57  
58  
59  
60

1  
2  
3  
4  
5  
6  
7  
8  
9  
10  
11  
12  
13  
14  
15  
16  
17  
18  
19  
20  
21  
22  
23  
24  
25  
26  
27  
28  
29  
30  
31  
32  
33  
34  
35  
36  
37  
38  
39  
40  
41  
42  
43  
44  
45  
46  
47  
48  
49  
50  
51  
52  
53  
54  
55  
56  
57  
58  
59  
60

## References

1. World Health Organisation, COVID-19 Weekly Epidemiological Update 36, 20th April 2021 <https://www.who.int/publications/m/item/weekly-epidemiological-update-on-covid-19---20-april-2021>. Accessed May 5, 2021.
2. World Health Organisation, COVID-19 Clinical management: living guidance, 25 January 2021 <https://www.who.int/publications/i/item/WHO-2019-nCoV-clinical-2021-1>. Accessed May 5, 2021.
3. Wu Z, McGoogan JM. Characteristics of and Important Lessons From the Coronavirus Disease 2019 (COVID-19) Outbreak in China: Summary of a Report of 72 314 Cases From the Chinese Center for Disease Control and Prevention. *JAMA* 2020 Apr 7; 323(13): 1239-1242.
4. Hatmi ZN. A Systematic Review of Systematic Reviews on the COVID-19 Pandemic [published online ahead of print, 2021 Jan 26]. *SN Compr Clin Med*. 2021;1-18. doi:10.1007/s42399-021-00749-y
5. Collins FS. NIH launches new initiative to study "Long COVID." National Institutes of Health. February 23, 2021. <https://www.nih.gov/about-nih/who-we-are/nih-director/statements/nih-launches-new-initiative-study-long-covid>. Accessed March 30, 2021.
6. Maxwell E. Living with Covid19: A dynamic review of the evidence around ongoing Covid19 symptoms (often called Long Covid). National Institute for Health Research; 30 September 2020. <https://evidence.nihr.ac.uk/themedreview/living-with-covid19/>. Accessed March 30, 2021.
7. Garrigues E, Janvier P, Kherabi Y, et al. Post-discharge persistent symptoms and health-related quality of life after hospitalization for COVID-19. *J Infect*. 2020;81(6):e4-e6. doi:10.1016/j.jinf.2020.08.029
8. Goërtz YMJ, Van Herck M, Delbressine JM, et al. Persistent symptoms 3 months after a SARS-CoV-2 infection: the post-COVID-19 syndrome?. *ERJ Open Res*. 2020;6(4):00542-2020. Published 2020 Oct 26. doi:10.1183/23120541.00542-2020
9. van den Borst B, Peters JB, Brink M, et al. Comprehensive health assessment three months after recovery from acute COVID-19 [published online ahead of print, 2020 Nov 21]. *Clin Infect Dis*. 2020;ciaa1750. doi:10.1093/cid/ciaa1750
10. Townsend L, Dyer AH, Jones K, et al. Persistent fatigue following SARS-CoV-2 infection is common and independent of severity of initial infection. *PLoS One*. 2020;15(11):e0240784. Published 2020 Nov 9. doi:10.1371/journal.pone.0240784
11. Carfi A, Bernabei R, Landi F; Gemelli Against COVID-19 Post-Acute Care Study Group. Persistent Symptoms in Patients After Acute COVID-19. *JAMA*. 2020;324(6):603-605. doi:10.1001/jama.2020.12603
12. Writing Committee for the COMEBAC Study Group, Morin L, Savale L, et al. Four-Month Clinical Status of a Cohort of Patients After Hospitalization for COVID-19. *JAMA*. 2021;325(15):1525-1534. doi:10.1001/jama.2021.3331
13. Boldrini P, Bernetti A, Fiore P; SIMFER Executive Committee, SIMFER Committee for International Affairs. Impact of COVID-19 outbreak on rehabilitation services and Physical and Rehabilitation Medicine physicians' activities in Italy. An official document of the

- 1  
2  
3 Italian PRM Society (SIMFER). *Eur J Phys Rehabil Med.* 2020;56(3):316-318.  
4 doi:10.23736/S1973-9087.20.06256-5  
5  
6 14. World Health Organisation, International Classification of Functioning, Disability and Health  
7 (ICF), 22 May 2001 [https://www.who.int/standards/classifications/international-](https://www.who.int/standards/classifications/international-classification-of-functioning-disability-and-health)  
8 [classification-of-functioning-disability-and-health](https://www.who.int/standards/classifications/international-classification-of-functioning-disability-and-health). Accessed March 30, 2021.  
9  
10 15. von Elm E, Altman DG, Egger M, et al. The Strengthening the Reporting of Observational  
11 Studies in Epidemiology (STROBE) statement: guidelines for reporting observational  
12 studies. *Lancet.* 2007;370(9596):1453-1457. doi:10.1016/S0140-6736(07)61602-X  
13  
14 16. Bestall JC, Paul EA, Garrod R, Garnham R, Jones PW, Wedzicha JA. Usefulness of the  
15 Medical Research Council (MRC) dyspnoea scale as a measure of disability in patients with  
16 chronic obstructive pulmonary disease. *Thorax.* 1999;54(7):581-586.  
17 doi:10.1136/thx.54.7.581  
18  
19 17. Krupp LB, LaRocca NG, Muir-Nash J, Steinberg AD. The fatigue severity scale. Application to  
20 patients with multiple sclerosis and systemic lupus erythematosus. *Arch Neurol.*  
21 1989;46(10):1121-1123. doi:10.1001/archneur.1989.00520460115022  
22  
23 18. Zigmond AS, Snaith RP. The hospital anxiety and depression scale. *Acta Psychiatr Scand.*  
24 1983;67(6):361-70.  
25  
26 19. Galeoto G, Lauta A, Palumbo A et al. The Barthel Index: Italian translation, adaptation and  
27 validation. *Int J Neurol Neurother.* 2015;2(2), 2378-3001.  
28  
29 20. Paltrinieri S. Cross-cultural validation of the Reintegration to Normal Living Index (RNLI) in  
30 Italian: translation and pilot study. April, 2021, MSc Thesis in Rehabilitation Science.  
31 University of Firenze, Italy  
32  
33 21. R Core Team (2020). R: A language and environment for statistical  
34 computing. R Foundation for Statistical Computing, Vienna, Austria.  
35 <https://www.R-project.org/>. Accessed April 14, 2020.  
36  
37 22. Chinese Association of Rehabilitation Medicine; Respiratory Rehabilitation Committee of  
38 Chinese Association of Rehabilitation Medicine; Cardiopulmonary Rehabilitation Group of  
39 Chinese Society of Physical Medicine and Rehabilitation. *Zhonghua Jie He He Hu Xi Za Zhi.*  
40 2020;43(4):308-314. doi:10.3760/cma.j.cn112147-20200228-00206  
41  
42 23. Thomas P, Baldwin C, Bissett B, et al. Physiotherapy management for COVID-19 in the  
43 acute hospital setting: clinical practice recommendations. *J Physiother.* 2020;66(2):73-82.  
44 doi:10.1016/j.jphys.2020.03.011  
45  
46 24. Boldrini P, Bernetti A, Fiore P; SIMFER Executive Committee, SIMFER Committee for  
47 International Affairs. Impact of COVID-19 outbreak on rehabilitation services and Physical  
48 and Rehabilitation Medicine physicians' activities in Italy. An official document of the  
49 Italian PRM Society (SIMFER). *Eur J Phys Rehabil Med.* 2020;56(3):316-318.  
50 doi:10.23736/S1973-9087.20.06256-5  
51  
52 25. McNeary L, Maltser S, Verduzco-Gutierrez M. Navigating Coronavirus Disease 2019 (Covid-  
53 19) in Psychiatry: A CAN Report for Inpatient Rehabilitation Facilities. *PM R.* 2020;12(5):512-  
54 515. doi:10.1002/pmrj.12369  
55  
56 26. COVID-19 rapid guideline: managing the long-term effects of COVID-19. London: National  
57 Institute for Health and Care Excellence (UK); December 18, 2020.  
58  
59  
60

- 1
- 2
- 3 27. Shah W, Hillman T, Playford ED, Hishmeh L. Managing the long term effects of covid-19:  
4 summary of NICE, SIGN, and RCGP rapid guideline. *BMJ*. 2021;372:n136. Published 2021  
5 Jan 22. doi:10.1136/bmj.n136
- 6
- 7 28. Costi S, Paltrinieri S, Bressi B, Fugazzaro S, Giorgi Rossi P, Mazzini E. Poor Sleep during the  
8 First Peak of the SARS-CoV-2 Pandemic: A Cross-Sectional Study. *Int J Environ Res Public*  
9 *Health*. 2021 Jan 4;18(1):306. doi: 10.3390/ijerph18010306. PMID: 33406588; PMCID:  
10 PMC7795804.
- 11
- 12 29. De Girolamo G, Polidori G, Morosini P, et al. Prevalence of common mental disorders in  
13 Italy: results from the European Study of the Epidemiology of Mental Disorders (ESEMeD).  
14 *Soc Psychiatry Psychiatr Epidemiol*. 2006;41(11):853-861. doi:10.1007/s00127-006-0097-4
- 15 30. JAMA Medical News Audio: An Inside Look at a Post-COVID-19 Clinic. [https://edhub.ama-](https://edhub.ama-assn.org/jn-learning/audio-player/18608245)  
16 [assn.org/jn-learning/audio-player/18608245](https://edhub.ama-assn.org/jn-learning/audio-player/18608245), accessed May 7, 2021.
- 17
- 18 31. Jaffri A, Jaffri UA. Post-Intensive care syndrome and COVID-19: crisis after a crisis?. *Heart*  
19 *Lung*. 2020;49(6):883-884. doi:10.1016/j.hrtlng.2020.06.006
- 20
- 21 32. Wenham C, Smith J, Morgan R; Gender and COVID-19 Working Group. COVID-19: the  
22 gendered impacts of the outbreak. *Lancet*. 2020;395(10227):846-848. doi:10.1016/S0140-
- 23 [6736\(20\)30526-2](https://doi.org/10.1016/S0140-6736(20)30526-2)
- 24
- 25 33. Purdie A, Hawkes S, Buse K, et al. Sex, gender and COVID-19: Disaggregated data and  
26 health disparities. [https://blogs.bmj.com/bmjgh/2020/03/24/sex-gender-and-covid-19-](https://blogs.bmj.com/bmjgh/2020/03/24/sex-gender-and-covid-19-disaggregated-data-and-health-disparities/)  
27 [disaggregated-data-and-health-disparities/](https://blogs.bmj.com/bmjgh/2020/03/24/sex-gender-and-covid-19-disaggregated-data-and-health-disparities/). Accessed March 24, 2020.
- 28
- 29 34. Spagnolo PA, Manson JE, Joffe H. Sex and Gender Differences in Health: What the COVID-  
30 19 Pandemic Can Teach Us. *Ann Intern Med*. 2020;173(5):385-386. doi:10.7326/M20-1941
- 31
- 32 35. Kelada M, Anto A, Dave K, Saleh SN. The Role of Sex in the Risk of Mortality From COVID-19  
33 Amongst Adult Patients: A Systematic Review. *Cureus*. 2020;12(8):e10114. Published 2020  
34 Aug 29. doi:10.7759/cureus.10114
- 35
- 36 36. Raparelli V, Palmieri L, Canevelli M, et al. Sex differences in clinical phenotype and  
37 transitions of care among individuals dying of COVID-19 in Italy. *Biol Sex Differ*.  
38 2020;11(1):57. Published 2020 Oct 16. doi:10.1186/s13293-020-00334-3
- 39
- 40 37. Marconi M. Gender differences in Covid-19: the importance of sex-disaggregated data.  
41 *Ital J Gender-Specific Med* 2021; 7(1): 4-6
- 42
- 43 38. Greenhalgh T, Knight M, A'Court C, Buxton M, Husain L. Management of post-acute covid-  
44 19 in primary care. *BMJ*. 2020;370:m3026. Published 2020 Aug 11. doi:10.1136/bmj.m3026
- 45
- 46 39. The Lancet, Editorial. Facing up to long COVID. *Lancet*. 2020 Dec 12;396(10266):1861
- 47
- 48 40. Amenta EM, Spallone A, Rodriguez-Barradas MC, El Sahly HM, Atmar RL, Kulkarni PA.  
49 Postacute COVID-19: An Overview and Approach to Classification. *Open Forum Infect Dis*.  
50 2020;7(12):ofaa509. Published 2020 Oct 21. doi:10.1093/ofid/ofaa509
- 51
- 52
- 53
- 54
- 55
- 56
- 57
- 58
- 59
- 60

STROBE Statement—Checklist of items that should be included in reports of *cross-sectional studies*

|                              | Item No | Recommendation                                                                                                                                                                                    | Page No       |
|------------------------------|---------|---------------------------------------------------------------------------------------------------------------------------------------------------------------------------------------------------|---------------|
| <b>Title and abstract</b>    | 1       | (a) Indicate the study's design with a commonly used term in the title or the abstract                                                                                                            | 1             |
|                              |         | (b) Provide in the abstract an informative and balanced summary of what was done and what was found                                                                                               | 2             |
| <b>Introduction</b>          |         |                                                                                                                                                                                                   |               |
| Background/rationale         | 2       | Explain the scientific background and rationale for the investigation being reported                                                                                                              | 4             |
| Objectives                   | 3       | State specific objectives, including any prespecified hypotheses                                                                                                                                  | 4             |
| <b>Methods</b>               |         |                                                                                                                                                                                                   |               |
| Study design                 | 4       | Present key elements of study design early in the paper                                                                                                                                           | 4-5           |
| Setting                      | 5       | Describe the setting, locations, and relevant dates, including periods of recruitment, exposure, follow-up, and data collection                                                                   | 5             |
| Participants                 | 6       | (a) Give the eligibility criteria, and the sources and methods of selection of participants                                                                                                       | 5             |
| Variables                    | 7       | Clearly define all outcomes, exposures, predictors, potential confounders, and effect modifiers. Give diagnostic criteria, if applicable                                                          | NA            |
| Data sources/<br>measurement | 8*      | For each variable of interest, give sources of data and details of methods of assessment (measurement). Describe comparability of assessment methods if there is more than one group              | 5             |
| Bias                         | 9       | Describe any efforts to address potential sources of bias                                                                                                                                         | NA            |
| Study size                   | 10      | Explain how the study size was arrived at                                                                                                                                                         | 6             |
| Quantitative variables       | 11      | Explain how quantitative variables were handled in the analyses. If applicable, describe which groupings were chosen and why                                                                      | 6             |
| Statistical methods          | 12      | (a) Describe all statistical methods, including those used to control for confounding                                                                                                             | 6             |
|                              |         | (b) Describe any methods used to examine subgroups and interactions                                                                                                                               | 6             |
|                              |         | (c) Explain how missing data were addressed                                                                                                                                                       | NA            |
|                              |         | (d) If applicable, describe analytical methods taking account of sampling strategy                                                                                                                | NA            |
|                              |         | (e) Describe any sensitivity analyses                                                                                                                                                             | 6             |
| <b>Results</b>               |         |                                                                                                                                                                                                   |               |
| Participants                 | 13*     | (a) Report numbers of individuals at each stage of study—eg numbers potentially eligible, examined for eligibility, confirmed eligible, included in the study, completing follow-up, and analysed | 6             |
|                              |         | (b) Give reasons for non-participation at each stage                                                                                                                                              | 5             |
|                              |         | (c) Consider use of a flow diagram                                                                                                                                                                | Figure 1, p.7 |
| Descriptive data             | 14*     | (a) Give characteristics of study participants (eg demographic, clinical, social) and information on exposures and potential confounders                                                          | 7-8           |
|                              |         | (b) Indicate number of participants with missing data for each variable of interest                                                                                                               | 8-9           |



|                          |     |                                                                                                                                                                                                              |                 |
|--------------------------|-----|--------------------------------------------------------------------------------------------------------------------------------------------------------------------------------------------------------------|-----------------|
| Outcome data             | 15* | Report numbers of outcome events or summary measures                                                                                                                                                         | 10              |
| Main results             | 16  | (a) Give unadjusted estimates and, if applicable, confounder-adjusted estimates and their precision (eg, 95% confidence interval). Make clear which confounders were adjusted for and why they were included | 11-12; Table 4. |
|                          |     | (b) Report category boundaries when continuous variables were categorized                                                                                                                                    | NA              |
|                          |     | (c) If relevant, consider translating estimates of relative risk into absolute risk for a meaningful time period                                                                                             | NA              |
| Other analyses           | 17  | Report other analyses done—eg analyses of subgroups and interactions, and sensitivity analyses                                                                                                               | 11-12           |
| <b>Discussion</b>        |     |                                                                                                                                                                                                              |                 |
| Key results              | 18  | Summarise key results with reference to study objectives                                                                                                                                                     | 12-13           |
| Limitations              | 19  | Discuss limitations of the study, taking into account sources of potential bias or imprecision. Discuss both direction and magnitude of any potential bias                                                   | 14              |
| Interpretation           | 20  | Give a cautious overall interpretation of results considering objectives, limitations, multiplicity of analyses, results from similar studies, and other relevant evidence                                   | 12-14           |
| Generalisability         | 21  | Discuss the generalisability (external validity) of the study results                                                                                                                                        | 14              |
| <b>Other information</b> |     |                                                                                                                                                                                                              |                 |
| Funding                  | 22  | Give the source of funding and the role of the funders for the present study and, if applicable, for the original study on which the present article is based                                                | 15              |

\*Give information separately for exposed and unexposed groups.

**Note:** An Explanation and Elaboration article discusses each checklist item and gives methodological background and published examples of transparent reporting. The STROBE checklist is best used in conjunction with this article (freely available on the Web sites of PLoS Medicine at <http://www.plosmedicine.org/>, Annals of Internal Medicine at <http://www.annals.org/>, and Epidemiology at <http://www.epidem.com/>). Information on the STROBE Initiative is available at [www.strobe-statement.org](http://www.strobe-statement.org).

# BMJ Open

## Sex Differences and Rehabilitation Needs after Hospital Discharge for COVID-19: An Italian Cross-sectional Study.

|                                 |                                                                                                                                                                                                                                                                                                                                                                                                                                                                                                                                                                                                                                                                                                                                                                                                                                                                                                                                                                                                                                                                                                                                                                                                                                                                                                                                                                                                                                                                                                                                                                                                                                                                                                                                                                                           |
|---------------------------------|-------------------------------------------------------------------------------------------------------------------------------------------------------------------------------------------------------------------------------------------------------------------------------------------------------------------------------------------------------------------------------------------------------------------------------------------------------------------------------------------------------------------------------------------------------------------------------------------------------------------------------------------------------------------------------------------------------------------------------------------------------------------------------------------------------------------------------------------------------------------------------------------------------------------------------------------------------------------------------------------------------------------------------------------------------------------------------------------------------------------------------------------------------------------------------------------------------------------------------------------------------------------------------------------------------------------------------------------------------------------------------------------------------------------------------------------------------------------------------------------------------------------------------------------------------------------------------------------------------------------------------------------------------------------------------------------------------------------------------------------------------------------------------------------|
| Journal:                        | <i>BMJ Open</i>                                                                                                                                                                                                                                                                                                                                                                                                                                                                                                                                                                                                                                                                                                                                                                                                                                                                                                                                                                                                                                                                                                                                                                                                                                                                                                                                                                                                                                                                                                                                                                                                                                                                                                                                                                           |
| Manuscript ID                   | bmjopen-2021-055308.R1                                                                                                                                                                                                                                                                                                                                                                                                                                                                                                                                                                                                                                                                                                                                                                                                                                                                                                                                                                                                                                                                                                                                                                                                                                                                                                                                                                                                                                                                                                                                                                                                                                                                                                                                                                    |
| Article Type:                   | Original research                                                                                                                                                                                                                                                                                                                                                                                                                                                                                                                                                                                                                                                                                                                                                                                                                                                                                                                                                                                                                                                                                                                                                                                                                                                                                                                                                                                                                                                                                                                                                                                                                                                                                                                                                                         |
| Date Submitted by the Author:   | 20-Jan-2022                                                                                                                                                                                                                                                                                                                                                                                                                                                                                                                                                                                                                                                                                                                                                                                                                                                                                                                                                                                                                                                                                                                                                                                                                                                                                                                                                                                                                                                                                                                                                                                                                                                                                                                                                                               |
| Complete List of Authors:       | <p>Fugazzaro, Stefania; Azienda Unità Sanitaria Locale - IRCCS Tecnologie Avanzate e Modelli Assistenziali in Oncologia di Reggio Emilia, Physical Medicine and Rehabilitation Unit</p> <p>Denti, Monica; Azienda USL - IRCCS di Reggio Emilia, Physical Medicine and Rehabilitation Unit</p> <p>Mainini, Carlotta; Azienda Unità Sanitaria Locale - IRCCS Tecnologie Avanzate e Modelli Assistenziali in Oncologia di Reggio Emilia, Physical Medicine and Rehabilitation Unit</p> <p>Accogli, Monia; Azienda Unità Sanitaria Locale - IRCCS Tecnologie Avanzate e Modelli Assistenziali in Oncologia di Reggio Emilia, Physical Medicine and Rehabilitation Unit</p> <p>Bedogni, Ginevra; Azienda Unità Sanitaria Locale - IRCCS Tecnologie Avanzate e Modelli Assistenziali in Oncologia di Reggio Emilia, Physical Medicine and Rehabilitation Unit</p> <p>Ghizzoni, Daniele; Private Hospital Villa Verde Srl, Physiotherapy Service</p> <p>Bertolini, Anna; Bachelor' degree in OT , Department of Medical and Sugical Sciences;University of Modena e Reggio</p> <p>Esseroukh, Otmen; Bachelor's degree PT, Department of Surgery, Medicine, DentristY and Morphological Sciences; University of Modena e Reggio Emilia</p> <p>Gualdi, Cecilia; Bachelor's degree PT, Department of Surgery, Medicine, DentristY and Morphological Sciences; University of Modena e Reggio Emilia</p> <p>Schiavi, Margherita; Azienda USL - IRCCS di Reggio Emilia, Department of Health Professions</p> <p>Braglia, Luca; Azienda USL - IRCCS di Reggio Emilia, Research and Statistic Infrastructure</p> <p>Costi, Stefania; Azienda USL - IRCCS di Reggio Emilia, Scientific Directorate; Bachelor' degree in OT , Department of Medical and Sugical Sciences;University of Modena e Reggio</p> |
| <b>Primary Subject Heading</b>: | Rehabilitation medicine                                                                                                                                                                                                                                                                                                                                                                                                                                                                                                                                                                                                                                                                                                                                                                                                                                                                                                                                                                                                                                                                                                                                                                                                                                                                                                                                                                                                                                                                                                                                                                                                                                                                                                                                                                   |
| Secondary Subject Heading:      | Respiratory medicine                                                                                                                                                                                                                                                                                                                                                                                                                                                                                                                                                                                                                                                                                                                                                                                                                                                                                                                                                                                                                                                                                                                                                                                                                                                                                                                                                                                                                                                                                                                                                                                                                                                                                                                                                                      |
| Keywords:                       | COVID-19, REHABILITATION MEDICINE, Respiratory infections < THORACIC MEDICINE                                                                                                                                                                                                                                                                                                                                                                                                                                                                                                                                                                                                                                                                                                                                                                                                                                                                                                                                                                                                                                                                                                                                                                                                                                                                                                                                                                                                                                                                                                                                                                                                                                                                                                             |
|                                 |                                                                                                                                                                                                                                                                                                                                                                                                                                                                                                                                                                                                                                                                                                                                                                                                                                                                                                                                                                                                                                                                                                                                                                                                                                                                                                                                                                                                                                                                                                                                                                                                                                                                                                                                                                                           |

1  
2  
3  
4  
5  
6  
7  
8  
9  
10  
11  
12  
13  
14  
15  
16  
17  
18  
19  
20  
21  
22  
23  
24  
25  
26  
27  
28  
29  
30  
31  
32  
33  
34  
35  
36  
37  
38  
39  
40  
41  
42  
43  
44  
45  
46  
47  
48  
49  
50  
51  
52  
53  
54  
55  
56  
57  
58  
59  
60

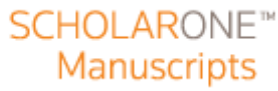



I, the Submitting Author has the right to grant and does grant on behalf of all authors of the Work (as defined in the below author licence), an exclusive licence and/or a non-exclusive licence for contributions from authors who are: i) UK Crown employees; ii) where BMJ has agreed a CC-BY licence shall apply, and/or iii) in accordance with the terms applicable for US Federal Government officers or employees acting as part of their official duties; on a worldwide, perpetual, irrevocable, royalty-free basis to BMJ Publishing Group Ltd ("BMJ") its licensees and where the relevant Journal is co-owned by BMJ to the co-owners of the Journal, to publish the Work in this journal and any other BMJ products and to exploit all rights, as set out in our [licence](#).

The Submitting Author accepts and understands that any supply made under these terms is made by BMJ to the Submitting Author unless you are acting as an employee on behalf of your employer or a postgraduate student of an affiliated institution which is paying any applicable article publishing charge ("APC") for Open Access articles. Where the Submitting Author wishes to make the Work available on an Open Access basis (and intends to pay the relevant APC), the terms of reuse of such Open Access shall be governed by a Creative Commons licence – details of these licences and which [Creative Commons](#) licence will apply to this Work are set out in our licence referred to above.

Other than as permitted in any relevant BMJ Author's Self Archiving Policies, I confirm this Work has not been accepted for publication elsewhere, is not being considered for publication elsewhere and does not duplicate material already published. I confirm all authors consent to publication of this Work and authorise the granting of this licence.

## Title page

**Sex Differences and Rehabilitation Needs after Hospital Discharge for COVID-19: An Italian Cross-sectional Study**

Stefania FUGAZZARO<sup>a</sup> MD, Monica DENTI<sup>a</sup> PT, Carlotta MAININI<sup>a</sup> PT, Monia Allisen ACCOGLI<sup>a</sup> PT, Ginevra BEDOGNI<sup>a</sup> MD, Daniele GHIZZONI<sup>b</sup> MD, Anna BERTOLINI<sup>c</sup> OT, Otmen ESSEROUKH<sup>d</sup> PT, Cecilia GUALDI<sup>d</sup> PT, Margherita SCHIAVI<sup>e</sup> OT, Luca BRAGLIA<sup>f</sup> MSc, Stefania COSTI<sup>d,g</sup> PhD

<sup>a</sup> Physical Medicine and Rehabilitation Unit, Azienda Unità Sanitaria Locale - IRCCS di Reggio Emilia, Viale Risorgimento n°80, 42123 Reggio Emilia, Italy;

<sup>b</sup> Physiotherapy Service, Casa di Cura Villa Verde, Viale Lelio Basso n° 1, 42124 Reggio Emilia, Italy;

<sup>c</sup> Bachelor's degree program in OT, Department of Medical and Surgical Sciences, University of Modena Reggio Emilia, Modena, Via del Pozzo n° 71, 41124, Italy.

<sup>d</sup> Bachelor's degree program in PT, Department of Surgery, Medicine, Dentistry and Morphological Sciences, University of Modena and Reggio Emilia, Via del Pozzo n° 71, 41124 Modena, Italy;

<sup>e</sup> Department of Health Professions, Azienda Unità Sanitaria Locale - IRCCS di Reggio Emilia, Via Amendola n° 2, Reggio Emilia, Italy

<sup>f</sup> Research and Statistic Infrastructure, Azienda Unità Sanitaria Locale – IRCCS Reggio Emilia, Viale Umberto I n°50, Reggio Emilia, Italy

<sup>g</sup> Scientific Directorate, Azienda Unità Sanitaria Locale - IRCCS di Reggio Emilia, Viale Umberto I n°50, 42123 Reggio Emilia, Italy;

Corresponding author:

Monica Denti, Physical Medicine and Rehabilitation Unit, Azienda Unità Sanitaria Locale-IRCCS di Reggio Emilia, Viale Risorgimento n° 80, 42123 Reggio Emilia, Italy;

E-mail: monica.denti@ausl.re.it

ORCID = <https://orcid.org/0000-0001-6541-2696>

Word count: 3373 words of text.

## Abstract

**Objectives:** Coronavirus disease 2019 (COVID-19) can result in persistent symptoms leaving potential rehabilitation needs unmet. This study aims to describe persistent symptoms and health status of individuals hospitalized for COVID-19 according to the International Classification of Functioning, Disability and Health (ICF) domains of impairments, limitations in activity, and participation restrictions.

**Design:** Cross-sectional study consisting in a telephone interview three months after hospital discharge.

**Setting:** This study was conducted during the first peak of the COVID-19 pandemic by the Local Health Authority of Reggio Emilia (Italy).

**Participants:** Adult individuals discharged from hospital between April and June 2020 after COVID-19. Exclusion criteria: hospitalization for reasons other than COVID-19, inability to participate in the study, concomitant acute or chronic conditions causing disability.

**Primary and secondary outcome measures:** We assessed: dyspnea (Medical Research Council), fatigue (Fatigue Severity Scale), mood disturbances (Hospital Anxiety and Depression Scale), limitations in activity (Barthel Index) and participation restrictions (Reintegration to Normal Living Index). We also collected data on sociodemographic characteristics, health status prior to COVID-19, COVID-related clinical manifestations and hospital care pathway up to discharge, rehabilitation interventions, accidental falls and emergency room access.

**Results:** 149 participants (men, 62%; average age 62 ( $\pm 11$ ) years) were enrolled, 35 of which (23%) were admitted to the ICU while hospitalized. Three months after hospital discharge, nearly half of the participants still suffered from dyspnea (44%) or fatigue (39%). Almost all individuals (91.2%) recovered a good level of independence in activity of daily living, but 76% still suffered participation restrictions. Female sex was significantly associated with worse outcomes for all symptoms.

**Conclusions:** Individuals who had moderate or severe COVID-19 may perceive persistent symptoms which may result in reduced social participation. Sex differences should be monitored, as women may recover more slowly than men.

**Trial Registration:** This independent observational study was registered on ClinicalTrials.com (NCT04438239).

**Key Words:** COVID-19, rehabilitation medicine, respiratory infections.

1  
2  
3  
4  
5  
6  
7  
8  
9  
10  
11  
12  
13  
14  
15  
16  
17  
18  
19  
20  
21  
22  
23  
24  
25  
26  
27  
28  
29  
30  
31  
32  
33  
34  
35  
36  
37  
38  
39  
40  
41  
42  
43  
44  
45  
46  
47  
48  
49  
50  
51  
52  
53  
54  
55  
56  
57  
58  
59  
60

## Article Summary

- This cross-sectional study investigated the long-term impact of COVID-19 on functional status of patients after hospital discharge.
- The telephone interviews collected data of patients discharged from the hospitals of the Local Health Authority of the Province of Reggio Emilia (Italy) only.
- To catch post-acute sequelae of SARS-COV2 infection, individuals with acute or chronic concomitant conditions causing disability and with previous complete dependence in activities of daily living (ADLs) were excluded.
- Eligible individuals were contacted by a letter of invitation and, if necessary, also by phone.
- Sociodemographic characteristics, health status prior to COVID-19, data regarding COVID-related hospital care and long-term health outcomes were collected.

## Introduction

### Background

The onset of the coronavirus disease 2019 (COVID-19) pandemic in early 2020 had a tremendous impact on the world population and on healthcare systems, with over 273 million cases worldwide as of December 19, 2021.<sup>1</sup> Early reports about surveillance were promptly released, and a tremendous effort was made to increase knowledge of diffusion patterns and prevention strategies. The presenting features of SARS-CoV-2 infection have been well described, with a widely accepted categorization of acute COVID-19 published by the WHO<sup>2</sup> and updated regularly. According to the WHO classification of COVID-19, which includes asymptomatic, mild, moderate, severe, and critical disease (WHO 2021),<sup>2</sup> 14-15% of cases have been severe and 5% critical.<sup>3</sup> However, for the first months of the pandemic, the long-term impact of the disease remained underexplored.

COVID-19 patients admitted to hospital experience fever, cough, dyspnea, muscle soreness, and/or acute respiratory distress syndrome, but also fatigue, gastrointestinal symptoms, and headache.<sup>4</sup> While most patients recover quickly, a growing number of studies have highlighted that several survivors of COVID-19 experience a multisystem condition termed post-acute sequelae of SARS-CoV-2 infection (PACS) characterized by fatigue, dyspnea, brain fog, headache, mood disturbances, and atypical chest pain.<sup>5</sup> These symptoms can last several weeks after the acute phase of the disease and may worsen functioning and quality of life and hinder participation<sup>6-13</sup>. Furthermore, in the presence of comorbidities, they may lead to deconditioning, fatigue, and social isolation.<sup>14</sup>

The International Classification of Functioning, Disability and Health (ICF) is a classification of health and health-related domains which measures health and disability at both the individual and population levels<sup>15</sup>. To our knowledge, no clinical trial has comprehensively assessed the persistent impact of COVID-19 according to the ICF,<sup>15</sup> although this assessment has been recommended to explore the long-term impairments but also limitations in activity and participation restrictions caused by SARS-CoV-2 infection.<sup>6</sup> This study aimed to verify whether individuals who had been hospitalized for COVID-19 had unmet rehabilitation needs lasting long beyond recovery.

### Objective

This study describes the persistent symptoms and impairments, limitations in activity, and restrictions in participation in social activities of those individuals who required hospitalization for COVID-19. It investigated the associations between sociodemographic characteristics, health status prior to COVID-19, COVID-related clinical manifestations and symptoms, and hospital care pathway up to discharge and health outcomes assessed three months after hospital discharge.

## Methods

### *Study design and population*



1  
2  
3 This cross-sectional study is reported according to the STROBE guidelines.<sup>16</sup> The study consisted in  
4 a telephone interview of patients hospitalized for COVID-19 during the first peak of the pandemic  
5 to collect current and retrospective data. All adult symptomatic individuals, discharged from the  
6 hospitals of the Local Health Authority (LHA) of the Province of Reggio Emilia (Italy) between April  
7 and June 2020, were screened for eligibility by medical documentation. We excluded individuals  
8 who a) were hospitalized for reasons other than COVID-19; b) were unable to participate in the  
9 study procedures (e.g., dementia, psychiatric disorders, linguistic barriers, etc.); c) had acute or  
10 chronic concomitant conditions causing disability (e.g., recent stroke, surgical interventions, heart  
11 failure, etc.); d) had previous complete dependence in activities of daily living (ADLs). We also  
12 excluded pregnant women to avoid a confounding effect of pregnancy on symptoms like fatigue or  
13 dyspnea. The study was approved by the local Ethics Committee (prot. 2020/0133, April 21, 2020).  
14 Due to the concomitant pandemic, it was not possible to involve patients or the public in the design,  
15 conduction, reporting, or dissemination of this study.  
16  
17  
18  
19  
20  
21  
22

23 All eligible individuals were sent a letter of invitation to participate in this study, written information  
24 about the study, a consent form and the principal investigator's request for permission for a  
25 researcher affiliated with the study to contact the individual by phone. Two weeks after the letter  
26 was sent, the potentially eligible individuals were contacted by a researcher, who gave them any  
27 further information, and asked that they return the written informed consent to participate in the  
28 interview. Individuals who did not answer the phone after three attempts and those who explicitly  
29 stated they did not intend to participate in the study were deleted from the list.  
30  
31  
32

33 We retrospectively collected the following data of each participant:  
34

- 35 ● sociodemographic characteristics (age, sex, household composition)
- 36 ● health status prior to COVID-19 (comorbidities, use of aids, and level of independence prior  
37 to hospitalization)
- 38 ● data regarding COVID-related hospital care
- 39 ● symptoms and clinical manifestation of COVID-19 (e.g., cough, fever, diarrhea, asthenia,  
40 localization of pneumonia, respiratory failure)
- 41 ● admission to the intensive care unit (ICU) and its duration
- 42 ● any rehabilitation treatment during hospitalization (e.g., mobilization, chest physiotherapy)
- 43 ● length of stay (LOS)

44  
45  
46  
47  
48  
49 Three months from hospital discharge, participants were interviewed by telephone to collect data  
50 on the persistency of the following symptoms and limitations:  
51

- 52 ● dyspnea, assessed by the Medical Research Council (MRC)<sup>17</sup>
- 53 ● fatigue, assessed by the Fatigue Severity Scale (FSS)<sup>18</sup>
- 54 ● mood disturbances, assessed by the Hospital Anxiety and Depression Scale (HADS)<sup>19</sup>
- 55 ● limitations in basic activities of daily living (B-ADL), assessed by the Barthel Index (BI)<sup>20</sup>
- 56 ● restrictions in participation, assessed by the Reintegration to Normal Living Index (RNLI)<sup>21</sup>  
57 (Italian version)  
58  
59  
60

1  
2  
3 Data on any rehabilitation intervention implemented after hospital discharge (type, duration,  
4 frequency) and on any accidental falls and related consequences, emergency room access, or any  
5 further hospital admissions after hospital discharge were also collected.  
6  
7

### 8 9 *Statistical analysis*

10  
11 In absence of an a priori hypothesis, given the exploratory nature of the study, no formal sample  
12 size calculation was performed; all eligible individuals who agreed to participate in the study were  
13 recruited. Sociodemographic characteristics, health status prior to COVID-19, COVID-related clinical  
14 manifestations and symptoms, and hospital care pathway up to discharge are reported, as are the  
15 data on long-term outcomes of COVID-19. Data are reported as frequency and percentage for  
16 categorical variables, mean and standard deviation for symmetric quantitative variables, and  
17 median and IQR for skewed variables.  
18  
19

20  
21 Proportions between groups were compared using the chi-square test or the Fisher's exact test.  
22 Associations between potential exposures and long-term outcomes were investigated using logistic  
23 regression models. Similarly, associations between the presence of long-term outcomes of COVID-  
24 19 and rehabilitation interventions, accidental falls/fractures, emergency room accesses, and/ or  
25 any hospital admission in the three months following hospital discharge were investigated. Unless  
26 otherwise specified, confidence intervals are two-tailed and calculated at the 0.95 confidence level.  
27 Tests were considered statistically significant when the P value was < 0.05. Statistical analysis was  
28 performed using R 3.5.2 R Core Team 2020.<sup>22</sup>  
29  
30  
31  
32

33  
34 *Patient and Public Involvement:* Due to the concomitant pandemic, it was not possible to involve  
35 patients or the public in the design, conduction, reporting, or dissemination of this study.  
36  
37  
38  
39

## 40 **Results**

### 41 42 *Participants*

43  
44 Between April and June 2020, 784 patients were discharged from the hospitals of the LHA of Reggio  
45 Emilia (Italy), which serves a population of 533 158 residents, after being healed from the acute  
46 phase of COVID-19. Overall, 446 individuals were excluded for the reasons listed in Figure 1; 338  
47 invitations to participate in the study were mailed to potentially eligible individuals, who were  
48 contacted by telephone two weeks later. Overall, 150 individuals consented to participate, and a  
49 telephone appointment for the interview was set up. One individual could not be reached for the  
50 interview, and his data were excluded from the analysis. Thus, 149 participants were interviewed  
51 between June and September 2020, at an average of 104 days ( $\pm 18.5$ ) from hospital discharge.  
52 Figure 1 reports the flow diagram of the study participants.  
53  
54  
55  
56  
57  
58  
59

60 Insert Figure 1 near here

### Descriptive data

The sociodemographic characteristics and health status of study participants are reported in Table 1. The average age of the study cohort was 62 ( $\pm 11$ ) years. Males accounted for 62.4% of the sample, and 51% were employed. Most participants lived with family members (89.3%) and had one or more comorbidities (82.6%), the most frequent being cardiovascular diseases (34.6%), metabolic diseases (15.6%), diabetes (8.7%), and obesity (8%). Before hospitalization for COVID-19, all but one participant were independent in B-ADL, and only 6% used walking aids for mobility.

**Table 1.** Sociodemographic characteristics and health status of the cohort

| Sociodemographic characteristics and health status | TOTAL (N=149)    |
|----------------------------------------------------|------------------|
| Age, mean (SD)                                     | 62( $\pm 11.5$ ) |
| Sex, N (%)                                         |                  |
| Male                                               | 93 (62.4)        |
| Female                                             | 56 (37.6)        |
| Household conditions, N (%)                        |                  |
| Alone                                              | 15 (10.0)        |
| With others                                        | 133 (89.3)       |
| Data missing                                       | 1 (0.7)          |
| Occupation, N (%)                                  |                  |
| Employed                                           | 76 (51.0)        |
| Retired                                            | 66 (44.3)        |
| Unemployed                                         | 7 (4.7)          |
| Smoker, N (%)                                      |                  |
| Yes                                                | 11 (7.4)         |
| No                                                 | 92 (61.7)        |
| Ex-smoker                                          | 46 (30.9)        |
| Comorbidities, N (%)                               |                  |
| No                                                 | 26 (17.4)        |
| Yes                                                | 123 (82.6)       |

| N of comorbidities per patient, N (%)                             |            |
|-------------------------------------------------------------------|------------|
| 0                                                                 | 26 (17.4)  |
| 1                                                                 | 43 (28.9)  |
| 2                                                                 | 39 (26.2)  |
| 3                                                                 | 23 (15.4)  |
| >3                                                                | 18 (12.1)  |
| Type of comorbidities, N (%), (Total N=263)                       |            |
| Cardiovascular diseases                                           | 91 (34.6)  |
| Metabolic diseases (dyslipidemia, gout, fatty liver disease, etc) | 41 (15.6)  |
| Diabetes                                                          | 23 (8.7)   |
| Obesity (BMI $\geq$ 30)                                           | 21 (8.0)   |
| Digestive system diseases                                         | 16 (6.1)   |
| Respiratory diseases                                              | 10 (3.8)   |
| Hematological diseases                                            | 8 (3.0)    |
| Rheumatological diseases                                          | 8 (3.0)    |
| Others                                                            | 45 (17.1)  |
| Independence before hospital admission, N (%)                     |            |
| Yes                                                               | 148 (99.3) |
| Minimal assistance for ADL                                        | 1 (0.7)    |
| Use of aids before hospital admission, N (%)                      |            |
| Yes                                                               | 9 (6.0)    |
| No                                                                | 140 (94.0) |

Legend: SD = Standard Deviation; N = Number; BMI = Body Mass Index; ADL = Activities of Daily Living

Table 2 reports data regarding the hospital care of participants, showing intensive care unit (ICU) admissions and sex-disaggregated data. Thirty-five individuals (23.5%) were admitted to the ICU. Overall, the average LOS was 18 ( $\pm$ 14) days, with a higher average LOS for individuals admitted to the ICU (33  $\pm$ 20 days). Most participants experienced respiratory failure (83.9%), with 12.1% having documented bilateral pneumonia.

Inpatient rehabilitation was delivered to 21 individuals, corresponding to 14.1% of the total sample and to 51.4% of participants admitted to the ICU. Early mobilization was offered to patients in the ICU and to patients hospitalized in acute wards, if they presented severe risk of functional limitations due to frailty or mobility limitations. Inpatient rehabilitation was performed six days per week and included pulmonary rehabilitation, mobilization, exercises, and counseling. Also, as soon as patients could self-manage a program of simple exercise, the physiotherapist gave them instructions and written information to guide them in the execution of breathing exercises, active range of motion exercises, and strength training while lying supine or sitting.

Outpatient rehabilitation after hospital discharge was attended by 21 individuals (14.1%), several of whom had been admitted to the ICU (40.0%). Outpatient rehabilitation was provided three times per week at the Physical Therapy Department and consisted in comprehensive pulmonary rehabilitation to improve persistent fatigue, exercise capacity, and breathlessness. It included breathing techniques such as pursed lip breathing, PEP-bottle exercises, and incentive spirometer. Patients were advised to continue the exercises at home, with individualized home sessions based on their needs (repeating breathing techniques, performing aerobic exercise, balance exercises, or resistance training).

Seventeen participants (11.4%) reported using a walking aid for mobility after hospital discharge (wheelchair, walker, stick, crutches). Moreover, accidental falls after hospital discharge were reported by 6.7% of participants, but only one resulted in emergency room access.

**Table 2.** Hospital care of participants and post-discharge period.

| Information about patients' hospital care and post-discharge    |                |                |               | Sex-disaggregated data             |                                   |
|-----------------------------------------------------------------|----------------|----------------|---------------|------------------------------------|-----------------------------------|
|                                                                 | TOTAL          | ICU            | Not-ICU       | Male (N=93)                        | Female (N=56)                     |
| Hospital care, N (%)                                            | 149 (100%)     | 35 (23.5%)     | 114 (76.5%)   | ICU 26 (28.0)<br>Not-ICU 67 (72.0) | ICU 9 (16.1)<br>Not-ICU 47 (83.9) |
| Total LOS, mean (SD)                                            | 18 ( $\pm$ 14) | 33 ( $\pm$ 20) | 14 ( $\pm$ 8) | 18.7 ( $\pm$ 13.9)                 | 17.4 ( $\pm$ 15.4)                |
| LOS in ICU, mean (SD)                                           |                | 14 ( $\pm$ 11) |               | 13.2 ( $\pm$ 10.8)                 | 16.1 ( $\pm$ 13.8)                |
| Symptoms at admission, N (%)                                    |                |                |               |                                    |                                   |
| Respiratory failure                                             | 125 (83.9)     | 35 (100)       | 90 (78.9)     | 80 (86.0)                          | 46 (82.1)                         |
| Bilateral pneumonia                                             | 18 (12.1)      | 0 (0)          | 18 (15.8)     | 11 (11.8)                          | 7 (12.5)                          |
| Mild symptoms                                                   | 4 (2.7)        | 0 (0)          | 4 (3.5)       | 2 (2.2)                            | 2 (3.6)                           |
| Other (pulmonary embolism)                                      | 2 (1.3)        | 0 (0)          | 2 (1.8)       | 0 (0)                              | 1 (1.8)                           |
| Clinical Category of COVID-19 and Type of Oxygen support, N (%) |                |                |               |                                    |                                   |

|                                              |            |           |            |           |           |
|----------------------------------------------|------------|-----------|------------|-----------|-----------|
| Critical COVID-19 (CPAP-NIV-intubation)      | 56 (37.6)  | 35 (100)  | 21 (18.4)  | 43 (46.2) | 13 (23.2) |
| Severe COVID-19 (HF oxygen devices)          | 61 (40.9)  | 0 (0)     | 61 (53.6)  | 33 (35.5) | 28 (50.0) |
| Moderate COVID-19 (LF oxygen devices)        | 16 (10.7)  | 0 (0)     | 16 (14.0)  | 9 (9.7)   | 7 (12.5)  |
| Mild COVID-19 (no oxygen support)            | 16 (10.7)  | 0 (0)     | 16 (14.0)  | 8 (8.6)   | 8 (14.3)  |
| Rehabilitation during hospitalization, N (%) |            |           |            |           |           |
| No                                           | 128 (85.9) | 17 (48.6) | 111 (97.4) | 81 (87.1) | 47 (83.9) |
| Yes                                          | 21 (14.1)  | 18 (51.4) | 3 (2.6)    | 12 (12.9) | 9 (16.1)  |
| Rehabilitation after discharge, N (%)        |            |           |            |           |           |
| No                                           | 128 (85.9) | 21 (60.0) | 107 (93.9) | 80 (86.0) | 48 (85.7) |
| Yes                                          | 21 (14.1)  | 14 (40.0) | 7 (6.1)    | 13 (14.0) | 8 (14.3)  |
| Use of aids after discharge, N (%)           |            |           |            |           |           |
| No                                           | 132 (88.6) | 26 (74.3) | 106 (93.0) | 85 (91.4) | 47 (83.9) |
| Yes                                          | 17 (11.4)  | 9 (25.7)  | 8 (7.0)    | 8 (8.6)   | 9 (16.1)  |
| Accidental falls after discharge, N (%)      |            |           |            |           |           |
| No                                           | 139 (93.3) | 32 (91.4) | 107 (93.9) | 88 (94.6) | 51 (91.1) |
| Yes                                          | 10 (6.7)   | 3 (8.6)   | 7 (6.1)    | 5 (5.4)   | 5 (8.9)   |

Legend: ICU = Intensive Care Unit; LOS= Length Of Stay; CPAP = Continuous Positive Airway Pressure; NIV = Non-Invasive Ventilation; HF = High Flow; LF = Low Flow.

### Outcome data

Table 3 describes the persistent symptoms, limitations in activity, and restrictions in participation three months after hospital discharge. Fatigue and dyspnea were the most prevalent persistent symptoms in the cohort investigated: 87.9% of participants experienced fatigue and 43% suffered from mild to severe dyspnea. Clinically relevant anxiety and depression scores (HADS  $\geq 8$ ) were detected in 24.8% and 16.1% of participants, respectively.

Most of the sample (91.3%) was completely independent, with only a few individuals (11) reporting need for assistance in B-ADL. Nevertheless, three months after discharge, only 24.2% of participants were completely reintegrated, while 75.1% reported moderate (RNLI 60-99) or even severe (RNLI <60) restrictions in participation (67.1% and 8.0%, respectively).

**Table 3.** Persistent symptoms, limitations in activity and restrictions in participation three months after hospital discharge

| Outcome                            | Male (=93) | Female (=56) | Total (=149) |
|------------------------------------|------------|--------------|--------------|
| Dyspnea, N (%)                     |            |              |              |
| Absent (MRC=0)                     | 59 (63.4)  | 24 (42.9)    | 83 (55.7)    |
| Mild (MRC =1)                      | 26 (28.0)  | 17 (30.3)    | 43 (28.9)    |
| Moderate (MRC 2-3)                 | 6 (6.4)    | 13 (23.2)    | 19 (12.8)    |
| Severe (MRC =4)                    | 1 (1.1)    | 1 (1.8)      | 2 (1.3)      |
| Data missing <sup>(a)</sup>        | 1 (1.1)    | 1 (1.8)      | 2 (1.3)      |
| Fatigue, n (%)                     |            |              |              |
| Absent (FSS=9)                     | 13 (14.0)  | 3 (5.4)      | 16 (10.7)    |
| Mild-moderate (FSS 10-36)          | 54 (58.0)  | 19 (33.9)    | 73 (49.0)    |
| Severe (FSS >36)                   | 25 (26.9)  | 33 (58.9)    | 58 (38.9)    |
| Data missing <sup>(a)</sup>        | 1 (1.1)    | 1 (1.8)      | 2 (1.3)      |
| Anxiety, N (%)                     |            |              |              |
| No (HADS-a <8)                     | 76 (81.7)  | 35 (62.5)    | 111 (74.5)   |
| Yes (HADS-a ≥8)                    | 16 (17.2)  | 21 (37.5)    | 37 (24.8)    |
| Data missing <sup>(a)</sup>        | 1 (1.1)    | 0 (0.0)      | 1 (0.7)      |
| Depression, N (%)                  |            |              |              |
| No (HADS-d <8)                     | 84 (90.3)  | 40 (71.4)    | 124 (83.2)   |
| Yes (HADS-d ≥8)                    | 8 (8.6)    | 16 (28.6)    | 24 (16.1)    |
| Data missing <sup>(a)</sup>        | 1 (1.1)    | 0 (0.0)      | 1 (0.7)      |
| Limitation in B-ADL, N (%)         |            |              |              |
| Independent (BI =100)              | 88 (94.6)  | 48 (85.7)    | 136 (91.3)   |
| Mild dependence (BI 91-99)         | 2 (2.2)    | 5 (8.9)      | 7 (4.7)      |
| Moderate dependence (BI 61-90)     | 2 (2.2)    | 2 (3.6)      | 4 (2.7)      |
| Severe dependence (BI 21-60)       | 0 (0.0)    | 0 (0.0)      | 0 (0.0)      |
| Complete dependence (BI 0-20)      | 0 (0.0)    | 0 (0.0)      | 0 (0.0)      |
| Data missing <sup>(a)</sup>        | 1 (1.1)    | 1 (1.8)      | 2 (1.3)      |
| Participation, N (%)               |            |              |              |
| Complete reintegration (RNLI =100) | 32 (34.4)  | 4 (7.1)      | 36 (24.2)    |
| Reduced reintegration (RNLI 60-99) | 55 (59.1)  | 45 (80.4)    | 100 (67.1)   |
| Poor reintegration (RNLI <60)      | 5 (5.4)    | 7 (12.5)     | 12 (8.0)     |
| Data missing <sup>(a)</sup>        | 1 (1.1)    | 0 (0.0)      | 1 (0.7)      |

Legend: MRC=Medical Research Council; FSS= Fatigue Severity Scale; HADS-a= Hospital Anxiety and Depression Scale – anxiety; HADS-d= Hospital Anxiety and Depression Scale – depression; B-ADL = Basic Activities of Daily Living; BI= Barthel Index; RNLI=Reintegration to Normal Living Index.<sup>(a)</sup> impossibility of administering the assessments due to difficulties in understanding the questions during the phone call on behalf of the participant;

Table 4 shows the odds ratios (OR) of the associations between potential exposures and outcomes three months after discharge. Increasing age seemed to be associated with less anxiety (OR 0.94,  $p = 0.006$ ), as each year of age seemed to reduce the risk by about 5%. Similar results were detected for depression (OR 0.95,  $p = 0.036$ ).

Being female was associated with persistent symptoms after COVID-19: three months after hospital discharge, 25% of females versus 7.5% of males suffered from dyspnea (OR 3.61,  $p = 0.019$ ), 59% of females versus 27% of males suffered from fatigue (OR 3.75,  $p < 0.001$ ), 37.5% of females versus 17% of males suffered from anxiety (OR 3.26,  $p = 0.007$ ), and 28.5% of females versus 8.6% of males suffered from depression (3.71,  $p = 0.011$ ); albeit not significantly, limitations in B-ADL were also more reported in females (14% versus 5.3%; OR 3.18,  $p = 0.078$ ).

Surprisingly, comorbidities were not associated with worse outcomes.

Dyspnea was more frequently reported by participants who used walking aids for mobility after discharge (OR 3.52,  $p = 0.042$ ) and by those who experienced an accidental fall (OR 5.02,  $p = 0.023$ ). Moreover, having had critical or severe COVID-19 was associated with a 70% reduction in the risk of anxiety (OR 0.29,  $p = 0.016$ ) and in the risk of depression, bordering on significance (OR 0.33,  $p = 0.062$ ).

Finally, accidental falls occurring after hospital discharge were associated with a fivefold increase in the risk of dyspnea (OR 5.02,  $p = 0.032$ ) and dependence in B-ADL (OR 5.51,  $p = 0.029$ ).

**Table 4.** Associations between potential exposures and outcomes three months after discharge.

| Risk factors               | Dyspnea<br>OR [CI]<br>(p-value) | Fatigue<br>OR [CI]<br>(p-value) | Anxiety<br>OR [CI]<br>(p-value) | Depression<br>OR [CI]<br>(p-value) | Dependence<br>in B-ADL<br>OR [CI]<br>(p-value) | Reintegration<br>OR [CI]<br>(p-value) |
|----------------------------|---------------------------------|---------------------------------|---------------------------------|------------------------------------|------------------------------------------------|---------------------------------------|
| Age                        | 1.00 [0.96-1.05] $p=0.806$      | 0.97 [0.93-1.00] $p=0.087$      | 0.94 [0.90-0.98] $p=0.006^*$    | 0.95 [0.90-0.99] $p=0.036^*$       | 1.05 [0.99-1.12] $p=(0.119)$                   | 0.95 [0.88-1.00] $p=0.102$            |
| Female sex                 | 3.61 [1.26-11.26] $p=0.019^*$   | 3.75 [1.75-8.26] $p<0.001^*$    | 3.26 [1.40-7.81] $p=0.007^*$    | 3.71 [1.39-10.69] $p=0.011^*$      | 3.18 [0.90-12.79] $p=0.078$                    | 2.59 [0.70-10.66] $p=0.157$           |
| Several comorbidities (>3) | 1.03 [0.20-4.26] $p=0.970$      | 0.92 [0.29-1.47] $p=0.883$      | 1.26 [0.34-4.34] $p=0.709$      | 0.30 [0.01-1.89] $p=0.281$         | 0.57 [0.02-4.24] $p=0.630$                     | 2.66 [0.45-15.85] $p=0.260$           |
| Diabetes                   | 1.57 [0.40-5.09] $p=0.471$      | 0.98 [0.37-2.48] $p=0.965$      | 0.88 [0.26-2.49] $p=0.823$      | 0.45 [0.06-1.76] $p=0.317$         | 3.12 [0.75-11.57] $p=0.094$                    | 0.48 [0.02-2.77] $p=0.499$            |
| Cardiovascular diseases    | 1.80 [0.54-8.23] $p=0.380$      | 0.73 [0.32-1.66] $p=0.458$      | 0.62 [0.25-1.58] $p=0.311$      | 0.79 [0.28-2.44] $p=0.675$         | 0.60 [0.16-2.42] $p=0.438$                     | 1.46 [0.34-10.06] $p=0.642$           |
| Obesity (BMI $\geq 30$ )   | 1.57 [0.40-5.09] $p=0.471$      | 1.36 [0.52-3.53] $p=0.520$      | 0.67 [0.18-2.03] $p=0.519$      | 0.82 [1.17-2.78] $p=0.775$         | 1.06 [0.15-4.55] $p=0.940$                     | 2.23 [0.45-8.91] $p=0.274$            |



|                                       |                                   |                           |                                  |                          |                                   |                          |
|---------------------------------------|-----------------------------------|---------------------------|----------------------------------|--------------------------|-----------------------------------|--------------------------|
| Critical or severe COVID-19           | 0.80 [0.26-2.28] p=0.691          | 0.70 [0.32-1.48] p=0.360  | 0.29 [0.10-0.75] <b>p=0.016*</b> | 0.33 [0.90-0.97] p=0.062 | 1.29 [0.35-4.56] p=0.681          | 1.03 [0.25-3.81] p=0.965 |
| Use of walking aids after discharge   | 3.52 [0.97-11.62] <b>p=0.042*</b> | 2.38 [0.79-7.56] p=0.124  | 2.05 [0.64-6.12] p=0.205         | 0.69 [0.10-2.79] p=0.653 | 2.79 [0.56-11.14] p=0.164         | 0.71 [0.03-4.24] p=0.762 |
| Accidental falls after discharge      | 5.02 [1.16-20.10] <b>p=0.023*</b> | 2.28 [0.61-9.37] p=0.220  | 3.48 [0.90-13.46] p=0.063        | 2.39 [0.48-9.58] p=0.237 | 5.51 [1.04-24.56] <b>p=0.029*</b> | 1.27 [0.06-8.00] p=0.829 |
| Rehabilitation during hospitalization | 3.01 [0.59-13.69] p=0.158         | 3.40 [0.97-13.89] p=0.064 | 0.43 [0.07-1.86] p=0.298         | 0.64 [0.07-3.40] p=0.639 | 4.12 [0.64-22.75] p=0.114         | 0.66 [0.02-5.60] p=0.751 |

Legend: OR = Odds Ratio; CI = Confidence interval; B-ADL = Basic Activities of Daily Living; BMI = Body Mass Index; \*statistically significant.

## Discussion

### *Statement of principal findings*

This study focused on the long-term impact of COVID-19 on functional status of those individuals who were severely affected by this disease. Three months after hospital discharge for COVID-19, individuals still reported moderate to severe fatigue (88%) and dyspnea (44%). They recovered a good level of independence in basic activities of daily living, but 76% still suffered participation restrictions. Females showed higher levels of fatigue, dyspnea, anxiety, and depression. Thus, these results confirm that individuals hospitalized experience persistent symptoms, adding insight into the impact of COVID-19 on limitations in activities and participation.

As millions of individuals are recovering from the infection, it may be appropriate to recognize those in need of rehabilitation, to help them to recover complete function and previous levels of participation.

Accordingly, the WHO recommends screening COVID-19 patients before hospital discharge to detect any rehabilitation needs they may have.<sup>2</sup> Reasonably, in the first few months after the outbreak of the pandemic, the very few studies published on the rehabilitation of patients with COVID-19 focused on treatment during the acute phase<sup>23,24</sup> or on the implications for health care organizations.<sup>14,25</sup> In December 2020, a rapid guideline on the management of the long-term outcomes of COVID-19 was published by the National Institute for Health and Care Excellence, which recommended a careful evaluation of symptoms, but also an overall assessment of the impact of the disease on daily life, including B-ADL, occupations, and social activities.<sup>26</sup> Recently, the WHO has published a new version of a living clinical guidance<sup>2</sup>, updating both the symptoms persisting after COVID-19 and the recommendations for rehabilitation needs assessment.<sup>27</sup> Moreover, in October 2021, the WHO coined the definition of 'post COVID-19 condition' to describe the condition of 'individuals with a history of probable or confirmed SARS-CoV-2 infection, usually three months from the onset of COVID-19, with symptoms lasting for at least two months, that cannot be explained by an alternative diagnosis. Common symptoms include fatigue, shortness of breath, cognitive dysfunction among other, and generally have an impact on everyday functioning'.<sup>28</sup>

1  
2  
3 Our study explored all the dimensions of health status by means of valid tools to assess symptoms,  
4 independence in B-ADL, and reintegration to normal living. The data collected seem to confirm that  
5 the likelihood of developing PACS is not linked to the severity of disease, and also confirm that  
6 fatigue and dyspnea are among the most frequent and persistent symptoms, as reported by some  
7 authors in the last months of 2020<sup>8,9</sup>, but also by more recent studies.<sup>29-35</sup>

8  
9  
10 Moreover, in the cohort investigated, clinically relevant anxiety and depression characterized 25%  
11 and 16% of participants respectively, which are proportions very close to those reported in a similar  
12 French cohort<sup>12</sup> and in a German cross-sectional study by Lemhofer.<sup>13</sup> Certainly, mood disorders can  
13 also be caused by the extraordinary nature of the pandemic, which has literally affected the entire  
14 planet. In fact, a study conducted on the healthy population living in the same area as the cohort  
15 investigated showed that, during the first peak of pandemic, mood disturbances were present in  
16 13.6%–54.5% of individuals.<sup>30</sup> Thus, regardless of their triggers, the prevalence of anxiety and  
17 depression during the pandemic seems higher than the usual estimate (10-11%).<sup>31</sup>

18  
19  
20 Interestingly, despite the large number of patients who claimed complete post-discharge  
21 independence in B-ADL (91.3%), 76% did not recover full social participation three months after  
22 hospital discharge. Although data were collected during the summer, when the SARS-CoV-2  
23 contagion was low and the restrictions imposed were minimal, we cannot exclude that at least part  
24 of those limitations in social participation may have been due to the remaining restrictions or to the  
25 fear of contracting the disease again. Whatever the cause or the mix of causes, this finding should  
26 not be underestimated, given that social participation is a domain of health and an indicator of  
27 successful aging. In fact, where post-COVID-19 clinics have been activated, the accurate assessment  
28 of limitations in B-ADL and social participation is considered important by clinicians.<sup>32</sup>

29  
30  
31 Social participation is one of the goals of rehabilitation interventions. However, during the first  
32 pandemic peak, rehabilitation was delivered to a limited number of COVID-19 patients, and, in our  
33 cohort, daily inpatient rehabilitation was mainly provided to patients admitted to an ICU; outpatient  
34 rehabilitation was offered to a small number of individuals. Focusing inpatient rehabilitation mainly  
35 on ICU patients was reasonable during the first wave of the pandemic, given that the long-term  
36 impact of COVID-19 was not known at the time, and directing all resources to the care of individuals  
37 struggling with severe or critical COVID-19 seemed appropriate, in the attempt to prevent the onset  
38 of post-intensive care syndromes, which affect up to 50% of ICU patients.<sup>36</sup>

39  
40  
41 This may explain why our data do not show a significant association between rehabilitation  
42 interventions and any of the health outcomes assessed three months after hospital discharge.  
43 Rehabilitation was delivered to more severe patients, supporting them in recovering a level of  
44 activity and participation similar to that of individuals with mild or moderate COVID-19, who were  
45 generally not referred to rehabilitation. Moreover, outpatient rehabilitation was offered three times  
46 per week only to patients with severe persistent dyspnea or fatigue, as rearranging health pathways  
47 during the early months of the pandemic in Italy was extremely complex.<sup>14</sup>

48  
49  
50 Taking into account the growing number of people affected by long-lasting consequences of COVID-  
51 19, outpatient rehabilitation is likely to represent a key element to support their recovery, as  
52 reported in a recent German survey,<sup>37</sup> and it is extremely important to expand outpatient  
53 therapeutic options to alleviate PACS and to hasten the return to normal life and working capacity.  
54  
55  
56  
57  
58  
59  
60

1  
2  
3 The most interesting finding of this study is that it seems that the long-term impact of COVID-19 is  
4 worse on women. Since the very first months of the pandemic, the need for sex-disaggregated data  
5 was advocated by researchers,<sup>38,39,40</sup> and the role of sex in the early immune response after SARS-  
6 CoV-2 infection and in mortality has been highlighted.<sup>41,42</sup> While mortality rate for COVID-19 seems  
7 higher in men with comorbidities,<sup>43</sup> our results, consistent with those of other research  
8 studies,<sup>44,45</sup> suggest that women may be more affected by COVID-19 sequelae several weeks after  
9 hospital discharge. Although no clear pathophysiology can explain this phenomenon, it has been  
10 hypothesized that the higher representation of women in autoimmune diseases may explain the sex  
11 differences in the immunological response to the acute and post-acute manifestations of COVID-19.  
12  
13  
14  
15  
16 <sup>35,46</sup>

### 17 18 *Strengths and weaknesses of the study*

19  
20 The results of this cross-sectional study should be interpreted with caution, since they originate  
21 from a single Italian province. Recruitment bias cannot be ruled out, as several individuals who were  
22 invited to participate did not adhere to the study (23% of those eligible) or could never be reached  
23 by phone (29%). Thus, it may be that individuals who were asymptomatic or those who still felt too  
24 unwell declined to participate. Moreover, for feasibility reasons, we chose to investigate only the  
25 most frequent persistent symptoms associated with PACS (dyspnea and fatigue). Nevertheless,  
26 several others, including musculoskeletal pain, mood disturbances, and cognitive deficits, among  
27 others, may also lead to the need for rehabilitation. Since this study was uncontrolled, we cannot  
28 exclude that some of the persistent symptoms and manifestations may have been due to the  
29 prolonged hospitalization or to post-ICU syndrome, or that they might also affect the general  
30 population (e.g., anxiety, participation restrictions) due to the containment measures imposed by  
31 the Italian government. Causal inferencing and generalization of the conclusions are therefore  
32 challenging.  
33  
34  
35  
36  
37  
38

39 One strength of this study is that the ICF framework was used to guide data collection, and the  
40 assessment of health status extended beyond impairment. Moreover, a valid assessment of  
41 outcomes allowed us to confirm differences between the sexes in post-COVID-19 syndrome, and,  
42 although further exploration is required, these data suggest that female COVID-19 survivors may  
43 need specific follow-up to ensure appropriate interventions<sup>34</sup> and equity in access to care.  
44  
45  
46  
47

### 48 *Unanswered questions and future research*

49  
50 After hospital discharge, differences between the sexes emerged in the long-term impact of COVID-  
51 19 in this Italian study. These differences should be searched and considered in future research.  
52 Future studies should investigate if tailored rehabilitation is offered and if equity is warranted in  
53 access to care.  
54  
55  
56  
57

### 58 **Conclusions**

1  
2  
3 Examining the long-term impact of COVID-19 is essential, given that the number of recovering  
4 individuals is growing daily. Healthcare services must implement the best-practice standards of care  
5 for individuals with post-COVID-19 syndrome. The results of this study indicate that women may  
6 recover more slowly than men. If confirmed, this information may prevent gender inequalities in  
7 accessing health services and facilitate appropriate referral to tailored rehabilitation.  
8  
9

10  
11  
12  
13 **Figure 1.** Flow diagram of the study participants.  
14  
15

16  
17  
18 **Acknowledgments:** the authors thank Jacqueline M. Costa for the English language editing.  
19

20 **Competing Interests:** all authors have completed the ICMJE uniform disclosure form at  
21 [www.icmje.org/coi\\_disclosure.pdf](http://www.icmje.org/coi_disclosure.pdf) and declare: no support from any organization for the submitted  
22 work; no financial relationships with any organizations that might have an interest in the submitted  
23 work in the previous three years; no other relationships or activities that could appear to have  
24 influenced the submitted work.  
25  
26

27  
28 **Contributorship statement:** as dictated by the Authorship guidelines of the International  
29 Committee of Medical Journal Editors, SF, MD, CM, MAA, GB, DG, AB, OE, CG, MS, LB and SC gave  
30 substantial contributions to the conception or design of the work or to the acquisition, analysis, or  
31 interpretation of data for the work; AND gave substantial contributions to the drafting the work or  
32 to its critical revision for important intellectual content; AND approved the final version to be  
33 published. All the authors agree to be accountable for all aspects of the work and ensure that  
34 questions related to the accuracy or integrity of any part of the work are appropriately investigated  
35 and resolved. This manuscript was completely written by its authors and reviewed in kind  
36 contribution for English language by an editor. The authors did not make use of medical writers.  
37 SF had full access to all the data in the study and take responsibility for the integrity of the data and  
38 the accuracy of the data analysis. LB conducted and is responsible for the data analysis.  
39 The corresponding author attests that all listed authors meet authorship criteria and that no others  
40 meeting the criteria have been omitted.  
41  
42  
43  
44  
45

46  
47 **Ethical approval:** This independent study was approved by Provincial Ethics Committee of Reggio  
48 Emilia on 21/04/2020 (ID 2020/0133). All participants provided written informed consent to  
49 participate in the trial.  
50

51  
52 **Funding:** This research received no specific grant from any funding agency in the public, commercial  
53 or not-for-profit sectors  
54

55  
56 **Transparency statement:** the lead author affirms that the manuscript is an honest, accurate, and  
57 transparent account of the study being reported; no important aspects of the study have been  
58 omitted; any discrepancies from the study as originally planned (and, if relevant, registered) have  
59 been explained.  
60

1  
2  
3  
4  
5  
6  
7  
8  
9  
10  
11  
12  
13  
14  
15  
16  
17  
18  
19  
20  
21  
22  
23  
24  
25  
26  
27  
28  
29  
30  
31  
32  
33  
34  
35  
36  
37  
38  
39  
40  
41  
42  
43  
44  
45  
46  
47  
48  
49  
50  
51  
52  
53  
54  
55  
56  
57  
58  
59  
60

**Data sharing:** Reasonable requests for all of the individual participant data collected during the trial, after deidentification, should be made to the corresponding author and will be considered by the REACT lead author. The presented data are anonymized and risk of identification is low.

**Dissemination declaration:** we planned to disseminate the results to study participants who will specifically request them via e-mail.

### License for publication

*"The Corresponding Author has the right to grant on behalf of all authors and does grant on behalf of all authors, a worldwide license to the Publishers and its licensees in perpetuity, in all forms, formats and media (whether known now or created in the future), to i) publish, reproduce, distribute, display and store the Contribution, ii) translate the Contribution into other languages, create adaptations, reprints, include within collections and create summaries, extracts and/or, abstracts of the Contribution, iii) create any other derivative work(s) based on the Contribution, iv) to exploit all subsidiary rights in the Contribution, v) the inclusion of electronic links from the Contribution to third party material where-ever it may be located; and, vi) license any third party to do any or all of the above."*

review only

## References

1. World Health Organisation, Weekly Epidemiological Update on COVID-19 – 21 December 2021 <https://www.who.int/publications/m/item/weekly-epidemiological-update-on-covid-19---21-december-2021>. Accessed Dec 27, 2021.
2. World Health Organisation, COVID-19 Clinical management: living guidance, 23 November 2021 <https://www.who.int/publications/i/item/WHO-2019-nCoV-clinical-2021-2>. Accessed Jan 9, 2022.
3. Wu Z, McGoogan JM. Characteristics of and Important Lessons From the Coronavirus Disease 2019 (COVID-19) Outbreak in China: Summary of a Report of 72 314 Cases From the Chinese Center for Disease Control and Prevention. *JAMA* 2020 Apr 7; 323(13): 1239-1242.
4. Hatmi ZN. A Systematic Review of Systematic Reviews on the COVID-19 Pandemic [published online ahead of print, 2021 Jan 26]. *SN Compr Clin Med*. 2021;1-18. doi:10.1007/s42399-021-00749-y
5. Collins FS. NIH launches new initiative to study “Long COVID.” National Institutes of Health. February 23, 2021. <https://www.nih.gov/about-nih/who-we-are/nih-director/statements/nih-launches-new-initiative-study-long-covid>. Accessed March 30, 2021.
6. Maxwell E. Living with Covid19: A dynamic review of the evidence around ongoing Covid19 symptoms (often called Long Covid). National Institute for Health Research; 30 September 2020. <https://evidence.nihr.ac.uk/themedreview/living-with-covid19/>. Accessed March 30, 2021.
7. Garrigues E, Janvier P, Kherabi Y, et al. Post-discharge persistent symptoms and health-related quality of life after hospitalization for COVID-19. *J Infect*. 2020;81(6):e4-e6. doi:10.1016/j.jinf.2020.08.029
8. Goërtz YMJ, Van Herck M, Delbressine JM, et al. Persistent symptoms 3 months after a SARS-CoV-2 infection: the post-COVID-19 syndrome?. *ERJ Open Res*. 2020;6(4):00542-2020. Published 2020 Oct 26. doi:10.1183/23120541.00542-2020
9. van den Borst B, Peters JB, Brink M, et al. Comprehensive health assessment three months after recovery from acute COVID-19 [published online ahead of print, 2020 Nov 21]. *Clin Infect Dis*. 2020;ciaa1750. doi:10.1093/cid/ciaa1750
10. Townsend L, Dyer AH, Jones K, et al. Persistent fatigue following SARS-CoV-2 infection is common and independent of severity of initial infection. *PLoS One*. 2020;15(11):e0240784. Published 2020 Nov 9. doi:10.1371/journal.pone.0240784
11. Carfi A, Bernabei R, Landi F; Gemelli Against COVID-19 Post-Acute Care Study Group. Persistent Symptoms in Patients After Acute COVID-19. *JAMA*. 2020;324(6):603-605. doi:10.1001/jama.2020.12603
12. Writing Committee for the COMEBAC Study Group, Morin L, Savale L, et al. Four-Month Clinical Status of a Cohort of Patients After Hospitalization for COVID-19. *JAMA*. 2021;325(15):1525-1534. doi:10.1001/jama.2021.3331
13. Lemhöfer C, Sturm C, Loudovici-Krug D, Best N, Gutenbrunner C. The impact of Post-COVID-Syndrome on functioning - results from a community survey in patients after mild and moderate SARS-CoV-2-infections in Germany. *J Occup Med Toxicol*. 2021 Oct 7;16(1):45. doi: 10.1186/s12995-021-00337-9.

14. Boldrini P, Bernetti A, Fiore P; SIMFER Executive Committee, SIMFER Committee for International Affairs. Impact of COVID-19 outbreak on rehabilitation services and Physical and Rehabilitation Medicine physicians' activities in Italy. An official document of the Italian PRM Society (SIMFER). *Eur J Phys Rehabil Med.* 2020;56(3):316-318. doi:10.23736/S1973-9087.20.06256-5
15. World Health Organisation, International Classification of Functioning, Disability and Health (ICF), 22 May 2001 <https://www.who.int/standards/classifications/international-classification-of-functioning-disability-and-health>. Accessed March 30, 2021.
16. von Elm E, Altman DG, Egger M, et al. The Strengthening the Reporting of Observational Studies in Epidemiology (STROBE) statement: guidelines for reporting observational studies. *Lancet.* 2007;370(9596):1453-1457. doi:10.1016/S0140-6736(07)61602-X
17. Bestall JC, Paul EA, Garrod R, Garnham R, Jones PW, Wedzicha JA. Usefulness of the Medical Research Council (MRC) dyspnoea scale as a measure of disability in patients with chronic obstructive pulmonary disease. *Thorax.* 1999;54(7):581-586. doi:10.1136/thx.54.7.581
18. Krupp LB, LaRocca NG, Muir-Nash J, Steinberg AD. The fatigue severity scale. Application to patients with multiple sclerosis and systemic lupus erythematosus. *Arch Neurol.* 1989;46(10):1121-1123. doi:10.1001/archneur.1989.00520460115022
19. Zigmond AS, Snaith RP. The hospital anxiety and depression scale. *Acta Psychiatr Scand.* 1983;67(6):361-70.
20. Galeoto G, Lauta A, Palumbo A et al. The Barthel Index: Italian translation, adaptation and validation. *Int J Neurol Neurother*,2015;2(2), 2378-3001.
21. Paltrinieri S. Cross-cultural validation of the Reintegration to Normal Living Index (RNLI) in Italian: translation and pilot study. April, 2021, MSc Thesis in Rehabilitation Science. University of Firenze, Italy
22. R Core Team (2020). R: A language and environment for statistical computing. R Foundation for Statistical Computing, Vienna, Austria. <https://www.R-project.org/>. Accessed April 14, 2020.
23. Chinese Association of Rehabilitation Medicine; Respiratory Rehabilitation Committee of Chinese Association of Rehabilitation Medicine; Cardiopulmonary Rehabilitation Group of Chinese Society of Physical Medicine and Rehabilitation. [Recommendations for respiratory rehabilitation of coronavirus disease 2019 in adult]. *Zhonghua Jie He He Hu Xi Za Zhi.* 2020 Apr 12;43(4):308-314. Chinese. doi: 10.3760/cma.j.cn112147-20200228-00206.
24. Thomas P, Baldwin C, Bissett B, et al. Physiotherapy management for COVID-19 in the acute hospital setting: clinical practice recommendations. *J Physiother.* 2020;66(2):73-82. doi:10.1016/j.jphys.2020.03.011
25. McNeary L, Maltser S, Verduzco-Gutierrez M. Navigating Coronavirus Disease 2019 (Covid-19) in Psychiatry: A CAN Report for Inpatient Rehabilitation Facilities. *PM R.* 2020;12(5):512-515. doi:10.1002/pmrj.12369
26. COVID-19 rapid guideline: managing the long-term effects of COVID-19 (NG188): Evidence review 5: interventions. London: National Institute for Health and Care Excellence (UK); 2020 Dec. (NICE Guideline, No. 188.) Available from: <https://www.ncbi.nlm.nih.gov/books/NBK567264/>

- 1  
2  
3 27. World Health Organisation, Rehabilitation needs of people recovering from COVID-19  
4 Scientific brief, 29 November 2021, [https://](https://www.who.int/publications/m/item/WHO-2019-nCoV-Sci_Brief-Rehabilitation-2021.1)  
5 [https://www.who.int/publications/m/item/WHO-2019-nCoV-Sci\\_Brief-Rehabilitation-](https://www.who.int/publications/m/item/WHO-2019-nCoV-Sci_Brief-Rehabilitation-2021.1)  
6 [2021.1](https://www.who.int/publications/m/item/WHO-2019-nCoV-Sci_Brief-Rehabilitation-2021.1), accessed Jan 9,2022.
- 7  
8 28. World Health Organisation, A clinical case definition of post COVID-19 condition by a  
9 Delphi consensus” 6 October 2021,  
10 [https://www.who.int/publications/i/item/WHO-2019-nCoV-Post\\_COVID-19\\_condition-](https://www.who.int/publications/i/item/WHO-2019-nCoV-Post_COVID-19_condition-Clinical_case_definition-2021.1)  
11 [Clinical\\_case\\_definition-2021.1](https://www.who.int/publications/i/item/WHO-2019-nCoV-Post_COVID-19_condition-Clinical_case_definition-2021.1), accessed Jan 9, 2022
- 12  
13 29. Shah W, Hillman T, Playford ED, Hishmeh L. Managing the long term effects of covid-19:  
14 summary of NICE, SIGN, and RCGP rapid guideline. *BMJ*. 2021;372:n136. Published 2021  
15 Jan 22. doi:10.1136/bmj.n136
- 16  
17 30. Costi S, Paltrinieri S, Bressi B, Fugazzaro S, Giorgi Rossi P, Mazzini E. Poor Sleep during the  
18 First Peak of the SARS-CoV-2 Pandemic: A Cross-Sectional Study. *Int J Environ Res Public*  
19 *Health*. 2021 Jan 4;18(1):306. doi: 10.3390/ijerph18010306. PMID: 33406588; PMCID:  
20 PMC7795804.
- 21  
22 31. De Girolamo G, Polidori G, Morosini P, et al. Prevalence of common mental disorders in  
23 Italy: results from the European Study of the Epidemiology of Mental Disorders (ESEMEd).  
24 *Soc Psychiatry Psychiatr Epidemiol*. 2006;41(11):853-861. doi:10.1007/s00127-006-0097-4
- 25  
26 32. JAMA Medical News Audio: An Inside Look at a Post-COVID-19 Clinic. [https://edhub.ama-](https://edhub.ama-assn.org/jn-learning/audio-player/18608245)  
27 [assn.org/jn-learning/audio-player/18608245](https://edhub.ama-assn.org/jn-learning/audio-player/18608245), accessed May 7, 2021.
- 28  
29 33. Huang C, Huang L, Wang Y, et al. 6-month consequences of COVID-19 in patients  
30 discharged from hospital: a cohort study. *Lancet*. 2021 Jan 16;397(10270):220-232. doi:  
31 10.1016/S0140-6736(20)32656-8.
- 32  
33 34. Iqbal A, Iqbal K, Arshad Ali S, et al. The COVID-19 Sequelae: A Cross-Sectional Evaluation of  
34 Post-recovery Symptoms and the Need for Rehabilitation of COVID-19 Survivors. *Cureus*.  
35 2021 Feb 2;13(2):e13080. doi: 10.7759/cureus.13080
- 36  
37 35. Tleyjeh IM, Saddik B, AlSwaidan N, et al. Prevalence and predictors of Post-Acute COVID-19  
38 Syndrome (PACS) after hospital discharge: A cohort study with 4 months median follow-up.  
39 *PLoS One*. 2021 Dec 7;16(12):e0260568. doi: 10.1371/journal.pone.0260568.
- 40  
41 36. Jaffri A, Jaffri UA. Post-Intensive care syndrome and COVID-19: crisis after a crisis?. *Heart*  
42 *Lung*. 2020;49(6):883-884. doi:10.1016/j.hrtlng.2020.06.006
- 43  
44 37. Lemhöfer C, Best N, Bökel A, et al. Satisfaction of COVID-19 Sufferers with Actors of the  
45 Health Care System and Rehabilitative Therapy Care using the COVID-19-Rehabilitation  
46 Needs Questionnaire (C19-RehabNeQ) in Bavaria. *Physikalische Medizin,*  
47 *Rehabilitationsmedizin*. 2021 Aug 25. doi: 10.1055/a-1528-1667
- 48  
49 38. Wenham C, Smith J, Morgan R; Gender and COVID-19 Working Group. COVID-19: the  
50 gendered impacts of the outbreak. *Lancet*. 2020;395(10227):846-848. doi:10.1016/S0140-
- 51  
52 6736(20)30526-2
- 53  
54 39. Purdie A, Hawkes S, Buse K, et al. Sex, gender and COVID-19: Disaggregated data and  
55 health disparities. [https://blogs.bmj.com/bmjgh/2020/03/24/sex-gender-and-covid-19-](https://blogs.bmj.com/bmjgh/2020/03/24/sex-gender-and-covid-19-disaggregated-data-and-health-disparities/)  
56 [disaggregated-data-and-health-disparities/](https://blogs.bmj.com/bmjgh/2020/03/24/sex-gender-and-covid-19-disaggregated-data-and-health-disparities/). Accessed March 24, 2020.
- 57  
58 40. Spagnolo PA, Manson JE, Joffe H. Sex and Gender Differences in Health: What the COVID-  
59 19 Pandemic Can Teach Us. *Ann Intern Med*. 2020;173(5):385-386. doi:10.7326/M20-1941
- 60



- 1  
2  
3 41. Kelada M, Anto A, Dave K, Saleh SN. The Role of Sex in the Risk of Mortality From COVID-19  
4 Amongst Adult Patients: A Systematic Review. *Cureus*. 2020;12(8):e10114. Published 2020  
5 Aug 29. doi:10.7759/cureus.10114  
6  
7 42. Raparelli V, Palmieri L, Canevelli M, et al. Sex differences in clinical phenotype and  
8 transitions of care among individuals dying of COVID-19 in Italy. *Biol Sex Differ*.  
9 2020;11(1):57. Published 2020 Oct 16. doi:10.1186/s13293-020-00334-3  
10  
11 43. Marconi M. Gender differences in Covid-19: the importance of sex-disaggregated data.  
12 *Ital J Gender-Specific Med* 2021; 7(1): 4-6  
13  
14 44. Huang C, Huang L, Wang Y, et al. 6-month consequences of COVID-19 in patients  
15 discharged from hospital: a cohort study. *Lancet*. 2021 Jan 16;397(10270):220-232. doi:  
16 10.1016/S0140-6736(20)32656-8.  
17  
18 45. Sudre CH, Murray B, Varsavsky T, et al. Attributes and predictors of long COVID. *Nat Med*.  
19 2021 Apr;27(4):626-631. doi: 10.1038/s41591-021-01292-y.  
20  
21 46. Ngo ST, Steyn FJ, McCombe PA. Gender differences in autoimmune disease. *Front*  
22 *Neuroendocrinol*. 2014 Aug;35(3):347-69. doi: 10.1016/j.yfrne.2014.04.004.  
23  
24  
25  
26  
27  
28  
29  
30  
31  
32  
33  
34  
35  
36  
37  
38  
39  
40  
41  
42  
43  
44  
45  
46  
47  
48  
49  
50  
51  
52  
53  
54  
55  
56  
57  
58  
59  
60

peer review only

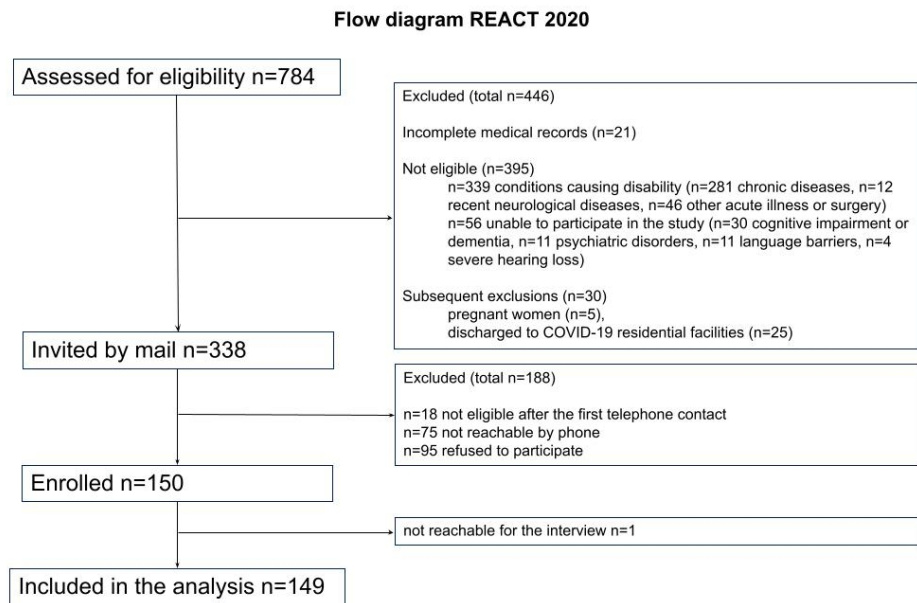

Figure 1. Flow diagram of the study participants

372x287mm (72 x 72 DPI)

## Title page

**Sex Differences and Rehabilitation Needs after Hospital Discharge for COVID-19: An Italian Cross-sectional Study**

Stefania FUGAZZARO<sup>a</sup> MD, Monica DENTI<sup>a</sup> PT, Carlotta MAININI<sup>a</sup> PT, Monia Allisen ACCOGLI<sup>a</sup> PT, Ginevra BEDOGNI<sup>a</sup> MD, Daniele GHIZZONI<sup>b</sup> MD, Anna BERTOLINI<sup>c</sup> OT, Otmen ESSEROUKH<sup>d</sup> PT, Cecilia GUALDI<sup>d</sup> PT, Margherita SCHIAVI<sup>e</sup> OT, Luca BRAGLIA<sup>f</sup> MSc, Stefania COSTI<sup>d,g</sup> PhD

<sup>a</sup> Physical Medicine and Rehabilitation Unit, Azienda Unità Sanitaria Locale - IRCCS di Reggio Emilia, Viale Risorgimento n°80, 42123 Reggio Emilia, Italy;

<sup>b</sup> Physiotherapy Service, Casa di Cura Villa Verde, Viale Lelio Basso n° 1, 42124 Reggio Emilia, Italy;

<sup>c</sup> Bachelor's degree program in OT, Department of Medical and Surgical Sciences, University of Modena Reggio Emilia, Modena, Via del Pozzo n° 71, 41124, Italy.

<sup>d</sup> Bachelor's degree program in PT, Department of Surgery, Medicine, Dentistry and Morphological Sciences, University of Modena and Reggio Emilia, Via del Pozzo n° 71, 41124 Modena, Italy;

<sup>e</sup> Department of Health Professions, Azienda Unità Sanitaria Locale - IRCCS di Reggio Emilia, Via Amendola n° 2, Reggio Emilia, Italy

<sup>f</sup> Research and Statistic Infrastructure, Azienda Unità Sanitaria Locale – IRCCS Reggio Emilia, Viale Umberto I n°50, Reggio Emilia, Italy

<sup>g</sup> Scientific Directorate, Azienda Unità Sanitaria Locale - IRCCS di Reggio Emilia, Viale Umberto I n°50, 42123 Reggio Emilia, Italy;

Corresponding author:

Monica Denti, Physical Medicine and Rehabilitation Unit, Azienda Unità Sanitaria Locale-IRCCS di Reggio Emilia, Viale Risorgimento n° 80, 42123 Reggio Emilia, Italy;

E-mail: monica.denti@ausl.re.it

ORCID = <https://orcid.org/0000-0001-6541-2696>

Word count: 3094 words of text.

## Abstract

**Objectives:** Coronavirus disease 2019 (COVID-19) can result in persistent symptoms leaving potential rehabilitation needs unmet. This study aims to describe persistent symptoms and health status of individuals hospitalized for COVID-19 according to the International Classification of Functioning, Disability and Health (ICF) domains of impairments, limitations in activity, and participation restrictions.

**Design:** Cross-sectional study consisting in a telephone interview three months after hospital discharge.

**Setting:** This study was conducted during the first peak of the COVID-19 pandemic by the Local Health Authority of Reggio Emilia (Italy).

**Participants:** Adult individuals discharged from hospital between April and June 2020 after COVID-19. Exclusion criteria: hospitalization for reasons other than COVID-19, inability to participate in the study, concomitant acute or chronic conditions causing disability.

**Primary and secondary outcome measures:** We assessed: dyspnea (Medical Research Council), fatigue (Fatigue Severity Scale), mood disturbances (Hospital Anxiety and Depression Scale), limitations in activity (Barthel Index) and participation restrictions (Reintegration to Normal Living Index). We also collected data on sociodemographic characteristics, health status prior to COVID-19, COVID-related clinical manifestations and hospital care pathway up to discharge, rehabilitation interventions, accidental falls and emergency room access.

**Results:** 149 participants (men, 62%; average age 62 ( $\pm 11$ ) years) were enrolled, 35 of which (23%) were admitted to the ICU while hospitalized. Three months after hospital discharge, **Almost-nearly** half of the participants still suffered from dyspnea (44%) or fatigue (39%). **Almost all** individuals (91.2%) recovered a good level of independence in activity of daily living, but 76% still suffered participation restrictions. Female sex was significantly associated with worse outcomes for all symptoms.

**Conclusions:** Individuals who had moderate or severe COVID-19 may perceive persistent symptoms which may result in reduced social participation. Sex differences should be monitored, as women may recover more slowly than men.

**Trial Registration:** This independent observational study was registered on ClinicalTrials.com (NCT04438239).

**Key Words:** COVID-19, rehabilitation medicine, respiratory infections.

1  
2  
3  
4  
5  
6  
7  
8  
9  
10  
11  
12  
13  
14  
15  
16  
17  
18  
19  
20  
21  
22  
23  
24  
25  
26  
27  
28  
29  
30  
31  
32  
33  
34  
35  
36  
37  
38  
39  
40  
41  
42  
43  
44  
45  
46  
47  
48  
49  
50  
51  
52  
53  
54  
55  
56  
57  
58  
59  
60

## Article Summary

- This cross-sectional study investigated the long-term impact of COVID-19 on functional status of patients after hospital discharge.
- The telephone interviews collected data of patients discharged from the hospitals of the Local Health Authority of the Province of Reggio Emilia (Italy) only.
- To catch post-acute sequelae of SARS-COV2 infection, individuals with acute or chronic concomitant conditions causing disability and with previous complete dependence in activities of daily living (ADLs) were excluded.
- Eligible individuals were contacted by a letter of invitation and, if necessary, also by phone.
- Sociodemographic characteristics, health status prior to COVID-19, data regarding COVID-related hospital care and long-term health outcomes were collected.

## Introduction

### Background

The onset of the coronavirus disease 2019 (COVID-19) pandemic in early 2020 had a tremendous impact on the world population and on healthcare systems, with **over 273 million cases worldwide** as of **December 19, 2021**.<sup>1</sup> Early reports about surveillance were promptly released, and a tremendous effort was made to increase knowledge of diffusion patterns and prevention strategies. The presenting features of SARS-CoV-2 infection have been well described, with a widely accepted categorization of acute COVID-19 published by the WHO<sup>2</sup> and updated regularly. According to the WHO classification of COVID-19, which includes asymptomatic, mild, moderate, severe, and critical disease (WHO 2021),<sup>2</sup> 14-15% of cases have been severe and 5% critical.<sup>3</sup> However, for the first months of the pandemic, the long-term impact of the disease remained underexplored.

COVID-19 patients admitted to hospital experience fever, cough, dyspnea, muscle soreness, and/or acute respiratory distress syndrome, but also fatigue, gastrointestinal symptoms, and headache.<sup>4</sup> While most patients recover quickly, a growing number of studies have highlighted that several survivors of COVID-19 experience a multisystem condition termed post-acute sequelae of SARS-CoV-2 infection (PACS) characterized by fatigue, dyspnea, brain fog, headache, mood disturbances, and atypical chest pain.<sup>5</sup> These symptoms can last several weeks after the acute phase of the disease and may **worsen functioning and quality of life and hinder participation**<sup>6-13</sup>. Furthermore, in the presence of comorbidities, they may lead to deconditioning, fatigue, and social isolation.<sup>14</sup>

**The International Classification of Functioning, Disability and Health (ICF) is a classification of health and health-related domains which measures health and disability at both the individual and population levels**<sup>15</sup>. To our knowledge, no clinical trial has comprehensively assessed the persistent impact of COVID-19 according to **the ICF**,<sup>15</sup> **although this assessment has been recommended to explore the long-term impairments but also limitations in activity and participation restrictions caused by SARS-CoV-2 infection**.<sup>6</sup> This study aimed to verify whether individuals who had been hospitalized for COVID-19 had unmet rehabilitation needs lasting long beyond recovery.

### Objective

This study describes the persistent symptoms and impairments, limitations in activity, and restrictions in participation in social activities of those individuals who required hospitalization for COVID-19. It investigated the associations between sociodemographic characteristics, health status prior to COVID-19, COVID-related clinical manifestations and symptoms, and hospital care pathway up to discharge and health outcomes assessed three months after hospital discharge.

## Methods

### *Study design and population*

1  
2  
3 This cross-sectional study is reported according to the STROBE guidelines.<sup>16</sup> The study consisted in  
4 a telephone interview of patients hospitalized for COVID-19 during the first peak of the pandemic  
5 to collect current and retrospective data. All adult symptomatic individuals, discharged from the  
6 hospitals of the Local Health Authority (LHA) of the Province of Reggio Emilia (Italy) between April  
7 and June 2020, were screened for eligibility by medical documentation. We excluded individuals  
8 who a) were hospitalized for reasons other than COVID-19; b) were unable to participate in the  
9 study procedures (e.g., dementia, psychiatric disorders, linguistic barriers, etc.); c) had acute or  
10 chronic concomitant conditions causing disability (e.g., recent stroke, surgical interventions, heart  
11 failure, etc.); d) had previous complete dependence in activities of daily living (ADLs). We also  
12 excluded pregnant women to avoid a confounding effect of pregnancy on symptoms like fatigue or  
13 dyspnea. The study was approved by the local Ethics Committee (prot. 2020/0133, April 21, 2020).  
14  
15  
16  
17  
18  
19

20 All eligible individuals were sent a letter of invitation to participate in this study, written information  
21 about the study, a consent form and the principal investigator's request for permission for a  
22 researcher affiliated with the study (~~physician, physiotherapist, or occupational therapist~~) to contact  
23 the individual by phone. Two weeks after the letter was sent, the potentially eligible individuals  
24 were contacted by a researcher, who gave them any further information requested, and asked that  
25 they return the written informed consent to participate in the interview. Individuals who did not  
26 answer the phone after three attempts and those who explicitly stated they did not intend to  
27 participate in the study were deleted from the list.  
28  
29  
30

31 We retrospectively collected the following data of each participant:

- 32 ● sociodemographic characteristics (age, sex, household composition)
- 33 ● health status prior to COVID-19 (comorbidities, use of aids, and level of independence prior
- 34 to hospitalization)
- 35 ● data regarding COVID-related hospital care
- 36 ● symptoms and clinical manifestation of COVID-19 (e.g., cough, fever, diarrhea, asthenia,
- 37 localization of pneumonia, respiratory failure)
- 38 ● admission to the intensive care unit (ICU) and its duration
- 39 ● any rehabilitation treatment during hospitalization (e.g., mobilization, chest physiotherapy)
- 40 ● length of stay (LOS)

41  
42  
43  
44  
45  
46  
47  
48 ~~The medical records of each consenting participant were retrospectively reviewed to collect data~~  
49 ~~on potential exposures, i.e., sociodemographic characteristics (age, sex, household composition)~~  
50 ~~and health status prior to COVID-19 (comorbidities, use of aids, and level of independence prior to~~  
51 ~~hospitalization). We also collected data regarding COVID-related hospital care, the symptoms and~~  
52 ~~clinical manifestation of COVID-19 (e.g., cough, fever, diarrhea, asthenia, localization of pneumonia,~~  
53 ~~respiratory failure), admission to the intensive care unit (ICU) and its duration, any rehabilitation~~  
54 ~~treatment during hospitalization (e.g., mobilization, chest physiotherapy), and length of stay (LOS).~~  
55  
56  
57 Three months from hospital discharge, participants were interviewed by telephone to collect data  
58 on the persistency of the following symptoms and limitations:  
59

- 60 ● dyspnea, assessed by the Medical Research Council (MRC)<sup>17</sup>

- fatigue, assessed by the Fatigue Severity Scale (FSS)<sup>18</sup>
- mood disturbances, assessed by the Hospital Anxiety and Depression Scale (HADS)<sup>19</sup>
- limitations in basic activities of daily living (B-ADL), assessed by the Barthel Index (BI)<sup>20</sup>
- restrictions in participation, assessed by the Reintegration to Normal Living Index (RNLI)<sup>21</sup> (Italian version)

Three months after hospital discharge, data regarding long-term health outcomes were collected through a telephone interview, which consisted in the assessment of persistent symptoms and impairments: dyspnea was assessed through the Medical Research Council (MRC) scale,<sup>16</sup> fatigue through the Fatigue Severity Scale (FSS),<sup>17</sup> and mood disturbances were assessed through the Hospital Anxiety and Depression Scale (HADS).<sup>18</sup> Data were also collected on limitations in basic activities of daily living (B-ADL) using the Barthel Index (BI)<sup>19</sup> and on restrictions in participation using the Italian version of the Reintegration to Normal Living Index (RNLI).<sup>20</sup> Data on any rehabilitation intervention implemented after hospital discharge (type, duration, frequency) and on any accidental falls and related consequences, emergency room access, or any further hospital admissions after hospital discharge were also collected.

Furthermore, qualitative data were explored through open-ended questions on the patient's recovery from COVID-19. The reporting of these qualitative data is currently underway.

### *Statistical analysis*

In absence of an a priori hypothesis, given the exploratory nature of the study, no formal sample size calculation was performed; all eligible individuals who agreed to participate in the study were recruited. Sociodemographic characteristics, health status prior to COVID-19, COVID-related clinical manifestations and symptoms, and hospital care pathway up to discharge are reported, as are the data on long-term outcomes of COVID-19. Data are reported as frequency and percentage for categorical variables, mean and standard deviation for symmetric quantitative variables, and median and IQR for skewed variables.

Proportions between groups were compared using the chi-square test or the Fisher's exact test. Associations between potential exposures and long-term outcomes were investigated using logistic regression models. Similarly, associations between the presence of long-term outcomes of COVID-19 and rehabilitation interventions, accidental falls/fractures, emergency room accesses, and/ or any hospital admission in the three months following hospital discharge were investigated. Unless otherwise specified, confidence intervals are two-tailed and calculated at the 0.95 confidence level. Tests were considered statistically significant when the P value was < 0.05. Statistical analysis was performed using R 3.5.2 R Core Team 2020.<sup>22</sup>

*Patient and Public Involvement: Due to the concomitant pandemic, it was not possible to involve patients or the public in the design, conduction, reporting, or dissemination of this study.*

## **Results**



### Participants

Between April and June 2020, 784 patients were discharged from the hospitals of the LHA of Reggio Emilia (Italy), which serves a population of 533 158 residents, after ~~being healed having recovered~~ from the acute phase of COVID-19. Overall, 446 ~~of these patients individuals~~ were excluded for the reasons listed in Figure 1 ~~for the following reasons: incomplete medical records, thus not permitting the eligibility screening (21), presence of acute or chronic conditions causing disability other than COVID-19 (339), and inability to participate in the study (56). Five pregnant women were also excluded, as were 25 individuals who were discharged to a COVID-19 residential facility. Thus;~~ 338 invitations to participate in the study were mailed to potentially eligible individuals, who were contacted by telephone two weeks later. ~~;~~ ~~18 more individuals were excluded in this phase for inability to participate in the interview (language barrier, cognitive impairment, severe hearing loss, aphasia). Ninety-five individuals refused to participate and 75 could not be reached by phone, despite repeated attempts.~~ Overall, 150 individuals consented to participate, and a telephone appointment for the interview was set up. One individual could not be reached for the interview, and his data were excluded from the analysis. Thus, 149 participants were interviewed between June and September 2020, at an average of 104 days ( $\pm 18.5$ ) from hospital discharge. Figure 1 reports the flow diagram of the study participants.

Insert Figure 1 near here

### Descriptive data

The sociodemographic characteristics and health status of study participants are reported in Table 1. The average age of the study cohort was 62 ( $\pm 11$ ) years. Males accounted for 62.4% of the sample, and 51% were employed. Most participants lived with family members (89.3%) and had one or more comorbidities (82.6%), the most frequent being cardiovascular diseases (34.6%), metabolic diseases (15.6%), diabetes (8.7%), and obesity (8%). ~~Other comorbidities included diseases of the digestive or respiratory systems (6.1% and 3.8%, respectively), hematological or rheumatological diseases (3% each); less frequent comorbidities included cancer, musculoskeletal diseases, and urogenital diseases (2.7% each), kidney and neurological diseases and psychiatric disorders (2.3% each), immune deficiencies (0.4%), and other (1.9%).~~ Before hospitalization for COVID-19, all but one participant were independent in B-ADL, and only 6% used walking aids for mobility.

**Table 1.** Sociodemographic characteristics and health status of the cohort

| <b>Sociodemographic characteristics and health status</b> | <b>TOTAL (N=149)</b> |
|-----------------------------------------------------------|----------------------|
| Age, mean (SD)                                            | 62(±11.5)            |
| <b>Sex, N (%)</b>                                         |                      |
| Male                                                      | 93 (62.4)            |
| Female                                                    | 56 (37.6)            |
| <b>Household conditions, N (%)</b>                        |                      |
| Alone                                                     | 15 (10.0)            |
| With others                                               | 133 (89.3)           |
| Data missing                                              | 1 (0.7)              |
| <b>Occupation, N (%)</b>                                  |                      |
| Employed                                                  | 76 (51.0)            |
| Retired                                                   | 66 (44.3)            |
| Unemployed                                                | 7 (4.7)              |
| <b>Smoker, N (%)</b>                                      |                      |
| Yes                                                       | 11 (7.4)             |
| No                                                        | 92 (61.7)            |
| Ex-smoker                                                 | 46 (30.9)            |
| <b>Comorbidities, N (%)</b>                               |                      |
| No                                                        | 26 (17.4)            |
| Yes                                                       | 123 (82.6)           |
| <b>N of comorbidities per patient, N (%)</b>              |                      |
| 0                                                         | 26 (17.4)            |
| 1                                                         | 43 (28.9)            |
| 2                                                         | 39 (26.2)            |
| 3                                                         | 23 (15.4)            |
| >3                                                        | 18 (12.1)            |
| <b>Type of comorbidities, N (%), (Total N=263)</b>        |                      |
| Cardiovascular diseases                                   | 91 (34.6)            |

|                                                                   |            |
|-------------------------------------------------------------------|------------|
| Metabolic diseases (dyslipidemia, gout, fatty liver disease, etc) | 41 (15.6)  |
| Diabetes                                                          | 23 (8.7)   |
| Obesity (BMI $\geq$ 30)                                           | 21 (8.0)   |
| Digestive system diseases                                         | 16 (6.1)   |
| Respiratory diseases                                              | 10 (3.8)   |
| Hematological diseases                                            | 8 (3.0)    |
| Rheumatological diseases                                          | 8 (3.0)    |
| Others                                                            | 45 (17.1)  |
| Independence before hospital admission, N (%)                     |            |
| Yes                                                               | 148 (99.3) |
| <del>Minimal assistance</del> <del>Need little help</del> for ADL | 1 (0.7)    |
| Use of aids before hospital admission, N (%)                      |            |
| Yes                                                               | 9 (6.0)    |
| No                                                                | 140 (94.0) |

Legend: SD = Standard Deviation; N = Number; BMI = Body Mass Index; ADL = Activities of Daily Living

Table 2 reports data regarding the hospital care of participants, showing intensive care unit (ICU) admissions and sex-disaggregated data. Thirty-five individuals (23.5%) were admitted to the ICU. Overall, the average LOS was 18 ( $\pm$ 14) days, with a higher average LOS for individuals admitted to the ICU (33  $\pm$ 20 days). Most participants experienced respiratory failure (83.9%), with 12.1% having documented bilateral pneumonia. ~~Accordingly, 37.6% of participants were in critical condition and needed respiratory assistance by means of continuous positive airway pressure, non-invasive ventilation, or intubation, while 40.9% needed high-flow oxygen therapy. Only 10.7% needed low-flow oxygen support, and an equal proportion did not need any respiratory support at all.~~

Inpatient rehabilitation was delivered to 21 individuals, corresponding to 14.1% of the total sample and to 51.4% of participants admitted to the ICU. ~~Early mobilization was offered to patients in the ICU and to patients hospitalized in acute wards, if they presented severe risk of functional limitations due to frailty or mobility limitations. Inpatient rehabilitation was performed six days per week and included pulmonary rehabilitation, mobilization, exercises, and counseling. Also, as soon as patients could self-manage a program of simple exercise, the physiotherapist gave them instructions and written information to guide them in the execution of breathing exercises, active range of motion exercises, and strength training while lying supine or sitting.~~

Outpatient rehabilitation after hospital discharge was attended by 21 individuals (14.1%), several of whom had been admitted to the ICU (40.0%). ~~Outpatient rehabilitation was provided three times~~

per week at the Physical Therapy Department and consisted in comprehensive pulmonary rehabilitation to improve persistent fatigue, exercise capacity, and breathlessness. It included breathing techniques such as pursed lip breathing, PEP-bottle exercises, and incentive spirometer. Patients were advised to continue the exercises at home, with individualized home sessions based on their needs (repeating breathing techniques, performing aerobic exercise, balance exercises, or resistance training).

Seventeen participants (11.4%) reported using a walking aid for mobility after hospital discharge (wheelchair, walker, stick, crutches). Moreover, accidental falls after hospital discharge were reported by 6.7% of participants, but only one resulted in emergency room access.

**Table 2.** Hospital care of participants and post-discharge period.

| Information about patients' hospital care and post-discharge    |                |                |               | Sex-disaggregated data             |                                   |
|-----------------------------------------------------------------|----------------|----------------|---------------|------------------------------------|-----------------------------------|
|                                                                 | TOTAL          | ICU            | Not-ICU       | Male (N=93)                        | Female (N=56)                     |
| Hospital care, N (%)                                            | 149 (100%)     | 35 (23.5%)     | 114 (76.5%)   | ICU 26 (28.0)<br>Not-ICU 67 (72.0) | ICU 9 (16.1)<br>Not-ICU 47 (83.9) |
| Total LOS, mean (SD)                                            | 18 ( $\pm$ 14) | 33 ( $\pm$ 20) | 14 ( $\pm$ 8) | 18.7 ( $\pm$ 13.9)                 | 17.4 ( $\pm$ 15.4)                |
| LOS in ICU, mean (SD)                                           |                | 14 ( $\pm$ 11) |               | 13.2 ( $\pm$ 10.8)                 | 16.1 ( $\pm$ 13.8)                |
| Symptoms at admission, N (%)                                    |                |                |               |                                    |                                   |
| Respiratory failure                                             | 125 (83.9)     | 35 (100)       | 90 (78.9)     | 80 (86.0)                          | 46 (82.1)                         |
| Bilateral pneumonia                                             | 18 (12.1)      | 0 (0)          | 18 (15.8)     | 11 (11.8)                          | 7 (12.5)                          |
| Mild symptoms                                                   | 4 (2.7)        | 0 (0)          | 4 (3.5)       | 2 (2.2)                            | 2 (3.6)                           |
| Other (pulmonary embolism)                                      | 2 (1.3)        | 0 (0)          | 2 (1.8)       | 0 (0)                              | 1 (1.8)                           |
| Clinical Category of COVID-19 and Type of Oxygen support, N (%) |                |                |               |                                    |                                   |
| Critical COVID-19 (CPAP-NIV-intubation)                         | 56 (37.6)      | 35 (100)       | 21 (18.4)     | 43 (46.2)                          | 13 (23.2)                         |
| Severe COVID-19 (HF oxygen devices)                             | 61 (40.9)      | 0 (0)          | 61 (53.6)     | 33 (35.5)                          | 28 (50.0)                         |
| Moderate COVID-19 (LF oxygen devices)                           | 16 (10.7)      | 0 (0)          | 16 (14.0)     | 9 (9.7)                            | 7 (12.5)                          |
| Mild COVID-19 (no oxygen support)                               | 16 (10.7)      | 0 (0)          | 16 (14.0)     | 8 (8.6)                            | 8 (14.3)                          |
| Rehabilitation during hospitalization, N (%)                    |                |                |               |                                    |                                   |

1  
2  
3  
4  
5  
6  
7  
8  
9  
10  
11  
12  
13  
14  
15  
16  
17  
18  
19  
20  
21  
22  
23  
24  
25  
26  
27  
28  
29  
30  
31  
32  
33  
34  
35  
36  
37  
38  
39  
40  
41  
42  
43  
44  
45  
46  
47  
48  
49  
50  
51  
52  
53  
54  
55  
56  
57  
58  
59  
60

|                                         |            |           |            |           |           |
|-----------------------------------------|------------|-----------|------------|-----------|-----------|
| No                                      | 128 (85.9) | 17 (48.6) | 111 (97.4) | 81 (87.1) | 47 (83.9) |
| Yes                                     | 21 (14.1)  | 18 (51.4) | 3 (2.6)    | 12 (12.9) | 9 (16.1)  |
| Rehabilitation after discharge, N (%)   |            |           |            |           |           |
| No                                      | 128 (85.9) | 21 (60.0) | 107 (93.9) | 80 (86.0) | 48 (85.7) |
| Yes                                     | 21 (14.1)  | 14 (40.0) | 7 (6.1)    | 13 (14.0) | 8 (14.3)  |
| Use of aids after discharge, N (%)      |            |           |            |           |           |
| No                                      | 132 (88.6) | 26 (74.3) | 106 (93.0) | 85 (91.4) | 47 (83.9) |
| Yes                                     | 17 (11.4)  | 9 (25.7)  | 8 (7.0)    | 8 (8.6)   | 9 (16.1)  |
| Accidental falls after discharge, N (%) |            |           |            |           |           |
| No                                      | 139 (93.3) | 32 (91.4) | 107 (93.9) | 88 (94.6) | 51 (91.1) |
| Yes                                     | 10 (6.7)   | 3 (8.6)   | 7 (6.1)    | 5 (5.4)   | 5 (8.9)   |

Legend: ICU = Intensive Care Unit; LOS= Length Of Stay; CPAP = Continuous Positive Airway Pressure; NIV = Non-Invasive Ventilation; HF = High Flow; LF = Low Flow.

### Outcome data

Table 3 describes the persistent symptoms, limitations in activity, and restrictions in participation three months after hospital discharge. Fatigue and dyspnea were the most prevalent persistent symptoms in the cohort investigated: 87.9% of participants experienced fatigue and 43% suffered from mild to severe dyspnea. Clinically relevant anxiety and depression scores (HADS  $\geq 8$ ) were detected in 24.8% and 16.1% of participants, respectively.

Most of the sample (91.3%) was completely independent, with only a few individuals (11) reporting need for assistance in B-ADL. Nevertheless, three months after discharge, only 24.2% of participants were completely reintegrated, while 75.1% reported moderate (RNLI 60-99) or even severe (RNLI  $< 60$ ) restrictions in participation (67.1% and 8.0%, respectively).

**Table 3.** Persistent symptoms, limitations in activity and restrictions in participation three months after hospital discharge

| Outcome                     | Male (=93) | Female (=56) | Total (=149) |
|-----------------------------|------------|--------------|--------------|
| Dyspnea, N (%)              |            |              |              |
| Absent (MRC =0)             | 59 (63.4)  | 24 (42.9)    | 83 (55.7)    |
| Mild (MRC =1)               | 26 (28.0)  | 17 (30.3)    | 43 (28.9)    |
| Moderate (MRC 2-3)          | 6 (6.4)    | 13 (23.2)    | 19 (12.8)    |
| Severe (MRC =4)             | 1 (1.1)    | 1 (1.8)      | 2 (1.3)      |
| Data missing <sup>(a)</sup> | 1 (1.1)    | 1 (1.8)      | 2 (1.3)      |
| Fatigue, n (%)              |            |              |              |
| Absent (FSS =9)             | 13 (14.0)  | 3 (5.4)      | 16 (10.7)    |

|                                    |           |           |            |
|------------------------------------|-----------|-----------|------------|
| Mild-moderate (FSS 10-36)          | 54 (58.0) | 19 (33.9) | 73 (49.0)  |
| Severe (FSS >36)                   | 25 (26.9) | 33 (58.9) | 58 (38.9)  |
| Data missing <sup>(a)</sup>        | 1 (1.1)   | 1 (1.8)   | 2 (1.3)    |
| Anxiety, N (%)                     |           |           |            |
| No (HADS-a <8)                     | 76 (81.7) | 35 (62.5) | 111 (74.5) |
| Yes (HADS-a ≥8)                    | 16 (17.2) | 21 (37.5) | 37 (24.8)  |
| Data missing <sup>(a)</sup>        | 1 (1.1)   | 0 (0.0)   | 1 (0.7)    |
| Depression, N (%)                  |           |           |            |
| No (HADS-d <8)                     | 84 (90.3) | 40 (71.4) | 124 (83.2) |
| Yes (HADS-d ≥8)                    | 8 (8.6)   | 16 (28.6) | 24 (16.1)  |
| Data missing <sup>(a)</sup>        | 1 (1.1)   | 0 (0.0)   | 1 (0.7)    |
| Limitation in B-ADL, N (%)         |           |           |            |
| Independent (BI =100)              | 88 (94.6) | 48 (85.7) | 136 (91.3) |
| Mild dependence (BI 91-99)         | 2 (2.2)   | 5 (8.9)   | 7 (4.7)    |
| Moderate dependence (BI 61-90)     | 2 (2.2)   | 2 (3.6)   | 4 (2.7)    |
| Severe dependence (BI 21-60)       | 0 (0.0)   | 0 (0.0)   | 0 (0.0)    |
| Complete dependence (BI 0-20)      | 0 (0.0)   | 0 (0.0)   | 0 (0.0)    |
| Data missing <sup>(a)</sup>        | 1 (1.1)   | 1 (1.8)   | 2 (1.3)    |
| Participation, N (%)               |           |           |            |
| Complete reintegration (RNLI =100) | 32 (34.4) | 4 (7.1)   | 36 (24.2)  |
| Reduced reintegration (RNLI 60-99) | 55 (59.1) | 45 (80.4) | 100 (67.1) |
| Poor reintegration (RNLI <60)      | 5 (5.4)   | 7 (12.5)  | 12 (8.0)   |
| Data missing <sup>(a)</sup>        | 1 (1.1)   | 0 (0.0)   | 1 (0.7)    |

Legend: MRC=Medical Research Council; FSS= Fatigue Severity Scale; HADS-a= Hospital Anxiety and Depression Scale – anxiety; HADS-d= Hospital Anxiety and Depression Scale – depression; B-ADL = Basic Activities of Daily Living; BI= Barthel Index; RNLI=Reintegration to Normal Living Index.<sup>(a)</sup> impossibility of administering the assessments due to difficulties in understanding the questions during the phone call on behalf of the participant;

Table 4 shows the odds ratios (OR) of the associations between potential exposures and outcomes three months after discharge. Increasing age seemed to be associated with less anxiety (OR 0.94,  $p = 0.006$ ), as each year of age seemed to reduce the risk by about 5%. Similar results were detected for depression (OR 0.95,  $p = 0.036$ ).

Being female was associated with persistent symptoms after COVID-19: three months after hospital discharge, **25% of females versus 7.5% of males suffered howed a three to four times higher risk of suffering** from dyspnea (OR 3.61,  $p = 0.019$ ), **59% of females versus 27% of males suffered from** fatigue (OR 3.75,  $p < 0.001$ ), **37.5% of females versus 17% of males suffered from** anxiety (OR 3.26,  $p = 0.007$ ), and **28.5% of females versus 8.6% of males suffered from** depression (3.71,  $p = 0.011$ ); albeit not significantly, limitations in B-ADL were also more reported in females (**14% versus 5.3%**; OR 3.18,  $p = 0.078$ ).

Surprisingly, comorbidities were not associated with worse outcomes.

Dyspnea was more frequently reported by participants who used walking aids for mobility after discharge (OR 3.52,  $p = 0.042$ ) and by those who experienced an accidental fall (OR 5.02,  $p = 0.023$ ). Moreover, having had critical or severe COVID-19 was associated with a 70% reduction in the risk of anxiety (OR 0.29,  $p = 0.016$ ) and in the risk of depression, bordering on significance (OR 0.33,  $p = 0.062$ ).

Finally, accidental falls occurring after hospital discharge were associated with a fivefold increase in the risk of dyspnea (OR 5.02,  $p = 0.032$ ) and dependence in B-ADL (OR 5.51,  $p = 0.029$ ).

**Table 4.** Associations between potential exposures and outcomes three months after discharge.

| Risk factors                          | Dyspnea OR [CI] (p-value)     | Fatigue OR [CI] (p-value)    | Anxiety OR [CI] (p-value)    | Depression OR [CI] (p-value)  | Dependence in B-ADL OR [CI] (p-value) | Reintegration OR [CI] (p-value) |
|---------------------------------------|-------------------------------|------------------------------|------------------------------|-------------------------------|---------------------------------------|---------------------------------|
| Age                                   | 1.00 [0.96-1.05] $p=0.806$    | 0.97 [0.93-1.00] $p=0.087$   | 0.94 [0.90-0.98] $p=0.006^*$ | 0.95 [0.90-0.99] $p=0.036^*$  | 1.05 [0.99-1.12] $p=(0.119)$          | 0.95 [0.88-1.00] $p=0.102$      |
| Female sex                            | 3.61 [1.26-11.26] $p=0.019^*$ | 3.75 [1.75-8.26] $p<0.001^*$ | 3.26 [1.40-7.81] $p=0.007^*$ | 3.71 [1.39-10.69] $p=0.011^*$ | 3.18 [0.90-12.79] $p=0.078$           | 2.59 [0.70-10.66] $p=0.157$     |
| Several comorbidities (>3)            | 1.03 [0.20-4.26] $p=0.970$    | 0.92 [0.29-1.47] $p=0.883$   | 1.26 [0.34-4.34] $p=0.709$   | 0.30 [0.01-1.89] $p=0.281$    | 0.57 [0.02-4.24] $p=0.630$            | 2.66 [0.45-15.85] $p=0.260$     |
| Diabetes                              | 1.57 [0.40-5.09] $p=0.471$    | 0.98 [0.37-2.48] $p=0.965$   | 0.88 [0.26-2.49] $p=0.823$   | 0.45 [0.06-1.76] $p=0.317$    | 3.12 [0.75-11.57] $p=0.094$           | 0.48 [0.02-2.77] $p=0.499$      |
| Cardiovascular diseases               | 1.80 [0.54-8.23] $p=0.380$    | 0.73 [0.32-1.66] $p=0.458$   | 0.62 [0.25-1.58] $p=0.311$   | 0.79 [0.28-2.44] $p=0.675$    | 0.60 [0.16-2.42] $p=0.438$            | 1.46 [0.34-10.06] $p=0.642$     |
| Obesity (BMI $\geq 30$ )              | 1.57 [0.40-5.09] $p=0.471$    | 1.36 [0.52-3.53] $p=0.520$   | 0.67 [0.18-2.03] $p=0.519$   | 0.82 [1.17-2.78] $p=0.775$    | 1.06 [0.15-4.55] $p=0.940$            | 2.23 [0.45-8.91] $p=0.274$      |
| Critical or severe COVID-19           | 0.80 [0.26-2.28] $p=0.691$    | 0.70 [0.32-1.48] $p=0.360$   | 0.29 [0.10-0.75] $p=0.016^*$ | 0.33 [0.90-0.97] $p=0.062$    | 1.29 [0.35-4.56] $p=0.681$            | 1.03 [0.25-3.81] $p=0.965$      |
| Use of walking aids after discharge   | 3.52 [0.97-11.62] $p=0.042^*$ | 2.38 [0.79-7.56] $p=0.124$   | 2.05 [0.64-6.12] $p=0.205$   | 0.69 [0.10-2.79] $p=0.653$    | 2.79 [0.56-11.14] $p=0.164$           | 0.71 [0.03-4.24] $p=0.762$      |
| Accidental falls after discharge      | 5.02 [1.16-20.10] $p=0.023^*$ | 2.28 [0.61-9.37] $p=0.220$   | 3.48 [0.90-13.46] $p=0.063$  | 2.39 [0.48-9.58] $p=0.237$    | 5.51 [1.04-24.56] $p=0.029^*$         | 1.27 [0.06-8.00] $p=0.829$      |
| Rehabilitation during hospitalization | 3.01 [0.59-13.69] $p=0.158$   | 3.40 [0.97-13.89] $p=0.064$  | 0.43 [0.07-1.86] $p=0.298$   | 0.64 [0.07-3.40] $p=0.639$    | 4.12 [0.64-22.75] $p=0.114$           | 0.66 [0.02-5.60] $p=0.751$      |

Legend: OR = Odds Ratio; CI = Confidence interval; B-ADL = Basic Activities of Daily Living; BMI = Body Mass Index; \*statistically significant.

## Discussion

### *Statement of principal findings*

This study focused on the long-term impact of COVID-19 on functional status of those individuals who were severely affected by this disease. Three months after hospital discharge for COVID-19, individuals still reported moderate to severe fatigue (88%) and dyspnea (44%). They recovered a good level of independence in basic activities of daily living, but 76% still suffered participation restrictions. Females showed higher levels of fatigue, dyspnea, anxiety, and depression. Thus, these results confirm that individuals hospitalized experience persistent symptoms, adding insight into the impact of COVID-19 on limitations in activities and participation.

As millions of individuals are recovering from the infection, it may be appropriate to recognize those in need of rehabilitation, to help them to recover complete function and previous levels of participation.

Accordingly, the WHO recommends screening COVID-19 patients before hospital discharge to detect any rehabilitation needs they may have.<sup>2</sup> Reasonably, in the first few months after the outbreak of the pandemic, the very few studies published on the rehabilitation of patients with COVID-19 focused on treatment during the acute phase<sup>23,24</sup> or on the implications for health care organizations.<sup>14,25</sup> In December 2020, a rapid guideline on the management of the long-term outcomes of COVID-19 was published by the National Institute for Health and Care Excellence, which and is now available to clinicians.<sup>26</sup> This guideline and recommended a careful evaluation of symptoms, but also an overall assessment of the impact of the disease on daily life, including B-ADL, occupations, and social activities.<sup>26</sup> Recently, the WHO has published a new version of a living clinical guidance<sup>2</sup>, updating both the symptoms persisting after COVID-19 and the recommendations for rehabilitation needs assessment.<sup>27</sup> Moreover, in October 2021, the WHO coined the definition of 'post COVID-19 condition' to describe the condition of 'individuals with a history of probable or confirmed SARS-CoV-2 infection, usually three months from the onset of COVID-19, with symptoms lasting for at least two months, that cannot be explained by an alternative diagnosis. Common symptoms include fatigue, shortness of breath, cognitive dysfunction among other, and generally have an impact on everyday functioning'.<sup>28</sup>

Our study explored all the dimensions of health status by means of valid tools to assess symptoms, independence in B-ADL, and reintegration to normal living. The data collected seem to confirm that the likelihood of developing PACSpost-COVID-19 syndrome is not linked to the severity of disease, and also confirm that fatigue and dyspnea are among the most frequent and persistent symptoms, as reported by some authors in the last months of 2020<sup>8,9</sup>, but also by more recent studies.<sup>29-35</sup>

Moreover, in the cohort investigated, clinically relevant anxiety and depression characterized 25% and 16% of participants respectively, which are proportions very close to those reported in a similar French cohort<sup>12</sup> and in a German cross-sectional study by Lemhofer.<sup>13</sup> Certainly, mood disorders can also be caused by the extraordinary nature of the pandemic, which has literally affected the entire planet. In fact, a study conducted on the healthy population living in the same area as the cohort investigated showed that, during the first peak of pandemic, mood disturbances were present in 13.6%–54.5% of individuals.<sup>30</sup> Thus, regardless of their triggers, the prevalence of anxiety and depression during the pandemic seems higher than the usual estimate (10-11%).<sup>31</sup>



1  
2  
3 Interestingly, despite the large number of patients who claimed complete post-discharge  
4 independence in B-ADL (91.3%), 76% did not recover full social participation three months after  
5 hospital discharge. Although data were collected during the summer, when the SARS-CoV-2  
6 contagion was low and the restrictions imposed were minimal, we cannot exclude that at least part  
7 of those limitations in social participation may have been due to the remaining restrictions or to the  
8 fear of contracting the disease again. Whatever the cause or the mix of causes, this finding should  
9 not be underestimated, given that social participation is a domain of health and an indicator of  
10 successful aging. In fact, where post-COVID-19 clinics have been activated, the accurate assessment  
11 of limitations in B-ADL and social participation is considered important by clinicians.<sup>32</sup>

12 Social participation is one of the goals of rehabilitation interventions. However, during the first  
13 pandemic peak, rehabilitation was delivered to a limited number of COVID-19 patients, and, in our  
14 cohort, daily inpatient rehabilitation was mainly provided to patients admitted to an ICU; outpatient  
15 rehabilitation was offered to a small number of individuals. Focusing inpatient rehabilitation mainly  
16 on ICU patients was reasonable during the first wave of the pandemic, given that the long-term  
17 impact of COVID-19 was not known at the time, and directing all resources to the care of individuals  
18 struggling with severe or critical COVID-19 seemed appropriate, in the attempt to prevent the onset  
19 of post-intensive care syndromes, which affect up to 50% of ICU patients.<sup>36</sup>

20 This may explain why our data do not show a significant association between rehabilitation  
21 interventions and any of the health outcomes assessed three months after hospital discharge.  
22 Rehabilitation was delivered to more severe patients, supporting them in recovering a level of  
23 activity and participation similar to that of individuals with mild or moderate COVID-19, who were  
24 generally not referred to rehabilitation. Moreover, outpatient rehabilitation was offered three times  
25 per week only to patients with severe persistent dyspnea or fatigue, as rearranging health pathways  
26 during the early months of the pandemic in Italy was extremely complex.<sup>14</sup>

27 Taking into account the growing number of people affected by long-lasting consequences of COVID-  
28 19, outpatient rehabilitation is likely to represent a key element to support their recovery, as  
29 reported in a recent German survey,<sup>37</sup> and it is extremely important to expand outpatient  
30 therapeutic options to alleviate PACS and to hasten the return to normal life and working capacity.  
31 The most interesting finding of this study is that it seems that the long-term impact of COVID-19 is  
32 worse on women. Since the very first months of the pandemic, the need for sex-disaggregated data  
33 was advocated by researchers,<sup>38,39,40</sup> and the role of sex in the early immune response after SARS-  
34 CoV-2 infection and in mortality has been highlighted.<sup>41,42</sup> While mortality rate for COVID-19 seems  
35 higher in men with comorbidities,<sup>43</sup> our results, consistent with those of other research  
36 studies,<sup>44,45</sup> suggest that women may be more affected by COVID-19 sequelae several weeks after  
37 hospital discharge. Although no clear pathophysiology can explain this phenomenon, it has been  
38 hypothesized that the higher representation of women in autoimmune diseases may explain the sex  
39 differences in the immunological response to the acute and post-acute manifestations of COVID-19.  
40  
41  
42  
43  
44  
45  
46  
47  
48  
49  
50  
51  
52  
53  
54  
55  
56  
57  
58  
59  
60

### *Strengths and weaknesses of the study*

The results of this cross-sectional study should be interpreted with caution, since they originate from a single Italian province. Recruitment bias cannot be ruled out, as several individuals who were

1  
2  
3 invited to participate did not adhere to the study (23% of those eligible) or could never be reached  
4 by phone (29%). Thus, it may be that individuals who were asymptomatic or those who still felt too  
5 unwell declined to participate. Moreover, for feasibility reasons, we chose to investigate only the  
6 most frequent persistent symptoms associated with PACS (dyspnea and fatigue). Nevertheless,  
7 several others, including musculoskeletal pain, mood disturbances, and cognitive deficits, among  
8 others, may also lead to the need for rehabilitation. Since this study was uncontrolled, we cannot  
9 exclude that some of the persistent symptoms and manifestations may have been due to the  
10 prolonged hospitalization or to post-ICU syndrome, or that they might also affect the general  
11 population (e.g., anxiety, participation restrictions) due to the containment measures imposed by  
12 the Italian government. Causal inferencing and generalization of the conclusions are therefore  
13 challenging.

14  
15 One strength of this study is that the ICF framework was used to guide data collection, and the  
16 assessment of health status extended beyond impairment. ~~To our knowledge, this is the first study~~  
17 ~~using this approach.~~ Moreover, a valid assessment of outcomes allowed us to ~~confirm~~  
18 ~~bring out~~ differences between the sexes in post-COVID-19 syndrome, and, although further exploration is  
19 required, these data suggest that female COVID-19 survivors may need specific follow-up ~~to ensure~~  
20 ~~appropriate interventions~~<sup>34</sup> and equity in access to care.

### 21 *Meaning of the study*

22 ~~A current and very lively debate concerns the sequelae of COVID-19 and the most appropriate~~  
23 ~~definition for this syndrome.<sup>38,39,40</sup> We believe that our data contribute to this debate, as they~~  
24 ~~highlight that COVID-19 can also affect the social activities of recovered patients, putting their global~~  
25 ~~health at risk.~~

26 ~~This study confirmed sex differences in post-COVID-19 recovery, that has already been noticed both~~  
27 ~~in clinics<sup>30</sup> and in previous studies. These apparent differences merit further investigation to identify~~  
28 ~~specific rehabilitation needs and ensure appropriate interventions,<sup>34</sup> and equity in access to care.~~

### 29 *Unanswered questions and future research*

30  
31 After hospital discharge, differences between the sexes emerged in the long-term impact of COVID-  
32 19 in this Italian study. These differences should be searched and considered in future research.  
33 Future studies should investigate if tailored rehabilitation is offered and if equity is warranted in  
34 access to care.

### 35 **Conclusions**

36  
37 Examining the long-term impact of COVID-19 is essential, given that the number of recovering  
38 individuals is growing daily. Healthcare services must implement the best-practice standards of care  
39 for individuals with post-COVID-19 syndrome. The results of this study indicate that women may  
40 recover more slowly than men. If confirmed, this information may prevent gender inequalities in  
41 accessing health services and facilitate appropriate referral to tailored rehabilitation.

1  
2  
3  
4  
5 **Figure 1. Flow diagram of the study participants.**  
6  
7  
8  
9

10 **Acknowledgments:** the authors thank Jacqueline M. Costa for the English language editing.  
11

12 **Competing Interests:** all authors have completed the ICMJE uniform disclosure form at  
13 [www.icmje.org/coi\\_disclosure.pdf](http://www.icmje.org/coi_disclosure.pdf) and declare: no support from any organization for the submitted  
14 work; no financial relationships with any organizations that might have an interest in the submitted  
15 work in the previous three years; no other relationships or activities that could appear to have  
16 influenced the submitted work.  
17  
18

19 **Contributor and guarantor information Contributorship statement:** as dictated by the Authorship  
20 guidelines of the International Committee of Medical Journal Editors, SF, MD, CM, MAA, GB, DG,  
21 AB, OE, CG, MS, LB and SC ~~all the authors of this manuscript~~ gave substantial contributions to the  
22 conception or design of the work or to the acquisition, analysis, or interpretation of data for the  
23 work; AND gave substantial contributions to the drafting the work or to its critical revision for  
24 important intellectual content; AND approved the final version to be published. All the authors  
25 agree to be accountable for all aspects of the work and ensure that questions related to the accuracy  
26 or integrity of any part of the work are appropriately investigated and resolved. This manuscript was  
27 completely written by its authors and reviewed in kind contribution for English language by an  
28 editor. The authors did not make use of medical writers.  
29

30 SF had full access to all the data in the study and take responsibility for the integrity of the data and  
31 the accuracy of the data analysis. LB conducted and is responsible for the data analysis.  
32

33 The corresponding author attests that all listed authors meet authorship criteria and that no others  
34 meeting the criteria have been omitted.  
35  
36

37 **Ethical approval:** This independent study was approved by Provincial Ethics Committee of Reggio  
38 Emilia on 21/04/2020 (ID 2020/0133). All participants provided written informed consent to  
39 participate in the trial.  
40  
41

42 **Funding:** This research received no specific grant from any funding agency in the public, commercial  
43 or not-for-profit sectors  
44  
45

46 **Transparency statement:** the lead author affirms that the manuscript is an honest, accurate, and  
47 transparent account of the study being reported; no important aspects of the study have been  
48 omitted; any discrepancies from the study as originally planned (and, if relevant, registered) have  
49 been explained.  
50  
51

52 **Data sharing:** Reasonable requests for all of the individual participant data collected during the trial,  
53 after deidentification, should be made to the corresponding author and will be considered by the  
54 REACT lead author. The presented data are anonymized and risk of identification is low.  
55  
56  
57  
58  
59  
60

1  
2  
3  
4  
5  
6 **Dissemination declaration:** we planned to disseminate the results to study participants who will  
7 specifically request them via e-mail.  
8  
9

#### 10 **License for publication**

11  
12 *“The Corresponding Author has the right to grant on behalf of all authors and does grant on behalf*  
13 *of all authors, a worldwide license to the Publishers and its licensees in perpetuity, in all forms,*  
14 *formats and media (whether known now or created in the future), to i) publish, reproduce, distribute,*  
15 *display and store the Contribution, ii) translate the Contribution into other languages, create*  
16 *adaptations, reprints, include within collections and create summaries, extracts and/or, abstracts of*  
17 *the Contribution, iii) create any other derivative work(s) based on the Contribution, iv) to exploit all*  
18 *subsidiary rights in the Contribution, v) the inclusion of electronic links from the Contribution to third*  
19 *party material where-ever it may be located; and, vi) license any third party to do any or all of the*  
20 *above.”*  
21  
22  
23  
24  
25  
26  
27  
28  
29  
30  
31  
32  
33  
34  
35  
36  
37  
38  
39  
40  
41  
42  
43  
44  
45  
46  
47  
48  
49  
50  
51  
52  
53  
54  
55  
56  
57  
58  
59  
60

peer review only

## References

1. World Health Organisation, Weekly Epidemiological Update on COVID-19 – 21 December 2021 <https://www.who.int/publications/m/item/weekly-epidemiological-update-on-covid-19---21-december-2021>. Accessed Dec 27, 2021.
2. World Health Organisation, COVID-19 Clinical management: living guidance, 23 November 2021 <https://www.who.int/publications/i/item/WHO-2019-nCoV-clinical-2021-2>. Accessed Jan 9, 2022.
3. Wu Z, McGoogan JM. Characteristics of and Important Lessons From the Coronavirus Disease 2019 (COVID-19) Outbreak in China: Summary of a Report of 72 314 Cases From the Chinese Center for Disease Control and Prevention. *JAMA* 2020 Apr 7; 323(13): 1239-1242.
4. Hatmi ZN. A Systematic Review of Systematic Reviews on the COVID-19 Pandemic [published online ahead of print, 2021 Jan 26]. *SN Compr Clin Med*. 2021;1-18. doi:10.1007/s42399-021-00749-y
5. Collins FS. NIH launches new initiative to study “Long COVID.” National Institutes of Health. February 23, 2021. <https://www.nih.gov/about-nih/who-we-are/nih-director/statements/nih-launches-new-initiative-study-long-covid>. Accessed March 30, 2021.
6. Maxwell E. Living with Covid19: A dynamic review of the evidence around ongoing Covid19 symptoms (often called Long Covid). National Institute for Health Research; 30 September 2020. <https://evidence.nihr.ac.uk/themedreview/living-with-covid19/>. Accessed March 30, 2021.
7. Garrigues E, Janvier P, Kherabi Y, et al. Post-discharge persistent symptoms and health-related quality of life after hospitalization for COVID-19. *J Infect*. 2020;81(6):e4-e6. doi:10.1016/j.jinf.2020.08.029
8. Goërtz YMJ, Van Herck M, Delbressine JM, et al. Persistent symptoms 3 months after a SARS-CoV-2 infection: the post-COVID-19 syndrome?. *ERJ Open Res*. 2020;6(4):00542-2020. Published 2020 Oct 26. doi:10.1183/23120541.00542-2020
9. van den Borst B, Peters JB, Brink M, et al. Comprehensive health assessment three months after recovery from acute COVID-19 [published online ahead of print, 2020 Nov 21]. *Clin Infect Dis*. 2020;ciaa1750. doi:10.1093/cid/ciaa1750
10. Townsend L, Dyer AH, Jones K, et al. Persistent fatigue following SARS-CoV-2 infection is common and independent of severity of initial infection. *PLoS One*. 2020;15(11):e0240784. Published 2020 Nov 9. doi:10.1371/journal.pone.0240784
11. Carfi A, Bernabei R, Landi F; Gemelli Against COVID-19 Post-Acute Care Study Group. Persistent Symptoms in Patients After Acute COVID-19. *JAMA*. 2020;324(6):603-605. doi:10.1001/jama.2020.12603
12. Writing Committee for the COMEBAC Study Group, Morin L, Savale L, et al. Four-Month Clinical Status of a Cohort of Patients After Hospitalization for COVID-19. *JAMA*. 2021;325(15):1525-1534. doi:10.1001/jama.2021.3331
13. Lemhöfer C, Sturm C, Loudovici-Krug D, Best N, Gutenbrunner C. The impact of Post-COVID-Syndrome on functioning - results from a community survey in patients after mild and moderate SARS-CoV-2-infections in Germany. *J Occup Med Toxicol*. 2021 Oct 7;16(1):45. doi: 10.1186/s12995-021-00337-9.

14. Boldrini P, Bernetti A, Fiore P; SIMFER Executive Committee, SIMFER Committee for International Affairs. Impact of COVID-19 outbreak on rehabilitation services and Physical and Rehabilitation Medicine physicians' activities in Italy. An official document of the Italian PRM Society (SIMFER). *Eur J Phys Rehabil Med.* 2020;56(3):316-318. doi:10.23736/S1973-9087.20.06256-5
15. World Health Organisation, International Classification of Functioning, Disability and Health (ICF), 22 May 2001 <https://www.who.int/standards/classifications/international-classification-of-functioning-disability-and-health>. Accessed March 30, 2021.
16. von Elm E, Altman DG, Egger M, et al. The Strengthening the Reporting of Observational Studies in Epidemiology (STROBE) statement: guidelines for reporting observational studies. *Lancet.* 2007;370(9596):1453-1457. doi:10.1016/S0140-6736(07)61602-X
17. Bestall JC, Paul EA, Garrod R, Garnham R, Jones PW, Wedzicha JA. Usefulness of the Medical Research Council (MRC) dyspnoea scale as a measure of disability in patients with chronic obstructive pulmonary disease. *Thorax.* 1999;54(7):581-586. doi:10.1136/thx.54.7.581
18. Krupp LB, LaRocca NG, Muir-Nash J, Steinberg AD. The fatigue severity scale. Application to patients with multiple sclerosis and systemic lupus erythematosus. *Arch Neurol.* 1989;46(10):1121-1123. doi:10.1001/archneur.1989.00520460115022
19. Zigmond AS, Snaith RP. The hospital anxiety and depression scale. *Acta Psychiatr Scand.* 1983;67(6):361-70.
20. Galeoto G, Lauti A, Palumbo A et al. The Barthel Index: Italian translation, adaptation and validation. *Int J Neurol Neurother.* 2015;2(2), 2378-3001.
21. Paltrinieri S. Cross-cultural validation of the Reintegration to Normal Living Index (RNLI) in Italian: translation and pilot study. April, 2021, MSc Thesis in Rehabilitation Science. University of Firenze, Italy
22. R Core Team (2020). R: A language and environment for statistical computing. R Foundation for Statistical Computing, Vienna, Austria. <https://www.R-project.org/>. Accessed April 14, 2020.
23. Chinese Association of Rehabilitation Medicine; Respiratory Rehabilitation Committee of Chinese Association of Rehabilitation Medicine; Cardiopulmonary Rehabilitation Group of Chinese Society of Physical Medicine and Rehabilitation. [Recommendations for respiratory rehabilitation of coronavirus disease 2019 in adult]. *Zhonghua Jie He He Hu Xi Za Zhi.* 2020 Apr 12;43(4):308-314. Chinese. doi: 10.3760/cma.j.cn112147-20200228-00206.
24. Thomas P, Baldwin C, Bissett B, et al. Physiotherapy management for COVID-19 in the acute hospital setting: clinical practice recommendations. *J Physiother.* 2020;66(2):73-82. doi:10.1016/j.jphys.2020.03.011
25. McNeary L, Maltser S, Verduzco-Gutierrez M. Navigating Coronavirus Disease 2019 (Covid-19) in Psychiatry: A CAN Report for Inpatient Rehabilitation Facilities. *PM R.* 2020;12(5):512-515. doi:10.1002/pmrj.12369
26. COVID-19 rapid guideline: managing the long-term effects of COVID-19 (NG188): Evidence review 5: interventions. London: National Institute for Health and Care Excellence (UK); 2020 Dec. (NICE Guideline, No. 188.) Available from: <https://www.ncbi.nlm.nih.gov/books/NBK567264/>

- 1
  - 2
  - 3
  - 4
  - 5
  - 6
  - 7
  - 8
  - 9
  - 10
  - 11
  - 12
  - 13
  - 14
  - 15
  - 16
  - 17
  - 18
  - 19
  - 20
  - 21
  - 22
  - 23
  - 24
  - 25
  - 26
  - 27
  - 28
  - 29
  - 30
  - 31
  - 32
  - 33
  - 34
  - 35
  - 36
  - 37
  - 38
  - 39
  - 40
  - 41
  - 42
  - 43
  - 44
  - 45
  - 46
  - 47
  - 48
  - 49
  - 50
  - 51
  - 52
  - 53
  - 54
  - 55
  - 56
  - 57
  - 58
  - 59
  - 60
27. World Health Organisation, Rehabilitation needs of people recovering from COVID-19 Scientific brief, 29 November 2021, [https://www.who.int/publications/m/item/WHO-2019-nCoV-Sci\\_Brief-Rehabilitation-2021.1](https://www.who.int/publications/m/item/WHO-2019-nCoV-Sci_Brief-Rehabilitation-2021.1), accessed Jan 9, 2022.
28. World Health Organisation, A clinical case definition of post COVID-19 condition by a Delphi consensus” 6 October 2021, [https://www.who.int/publications/i/item/WHO-2019-nCoV-Post\\_COVID-19\\_condition-Clinical\\_case\\_definition-2021.1](https://www.who.int/publications/i/item/WHO-2019-nCoV-Post_COVID-19_condition-Clinical_case_definition-2021.1), accessed Jan 9, 2022
29. Shah W, Hillman T, Playford ED, Hishmeh L. Managing the long term effects of covid-19: summary of NICE, SIGN, and RCGP rapid guideline. *BMJ*. 2021;372:n136. Published 2021 Jan 22. doi:10.1136/bmj.n136
30. Costi S, Paltrinieri S, Bressi B, Fugazzaro S, Giorgi Rossi P, Mazzini E. Poor Sleep during the First Peak of the SARS-CoV-2 Pandemic: A Cross-Sectional Study. *Int J Environ Res Public Health*. 2021 Jan 4;18(1):306. doi: 10.3390/ijerph18010306. PMID: 33406588; PMCID: PMC7795804.
31. De Girolamo G, Polidori G, Morosini P, et al. Prevalence of common mental disorders in Italy: results from the European Study of the Epidemiology of Mental Disorders (ESEMeD). *Soc Psychiatry Psychiatr Epidemiol*. 2006;41(11):853-861. doi:10.1007/s00127-006-0097-4
32. JAMA Medical News Audio: An Inside Look at a Post-COVID-19 Clinic. <https://edhub.ama-assn.org/jn-learning/audio-player/18608245>, accessed May 7, 2021.
33. Huang C, Huang L, Wang Y, et al. 6-month consequences of COVID-19 in patients discharged from hospital: a cohort study. *Lancet*. 2021 Jan 16;397(10270):220-232. doi: 10.1016/S0140-6736(20)32656-8.
34. Iqbal A, Iqbal K, Arshad Ali S, et al. The COVID-19 Sequelae: A Cross-Sectional Evaluation of Post-recovery Symptoms and the Need for Rehabilitation of COVID-19 Survivors. *Cureus*. 2021 Feb 2;13(2):e13080. doi: 10.7759/cureus.13080
35. Tleyjeh IM, Saddik B, AlSwaidan N, et al. Prevalence and predictors of Post-Acute COVID-19 Syndrome (PACS) after hospital discharge: A cohort study with 4 months median follow-up. *PLoS One*. 2021 Dec 7;16(12):e0260568. doi: 10.1371/journal.pone.0260568.
36. Jaffri A, Jaffri UA. Post-Intensive care syndrome and COVID-19: crisis after a crisis?. *Heart Lung*. 2020;49(6):883-884. doi:10.1016/j.hrtlng.2020.06.006
37. Lemhöfer C, Best N, Bökel A, et al. Satisfaction of COVID-19 Sufferers with Actors of the Health Care System and Rehabilitative Therapy Care using the COVID-19-Rehabilitation Needs Questionnaire (C19-RehabNeQ) in Bavaria. *Physikalische Medizin, Rehabilitationsmedizin*. 2021 Aug 25. doi: 10.1055/a-1528-1667
38. Wenham C, Smith J, Morgan R; Gender and COVID-19 Working Group. COVID-19: the gendered impacts of the outbreak. *Lancet*. 2020;395(10227):846-848. doi:10.1016/S0140-6736(20)30526-2
39. Purdie A, Hawkes S, Buse K, et al. Sex, gender and COVID-19: Disaggregated data and health disparities. <https://blogs.bmj.com/bmjgh/2020/03/24/sex-gender-and-covid-19-disaggregated-data-and-health-disparities/>. Accessed March 24, 2020.
40. Spagnolo PA, Manson JE, Joffe H. Sex and Gender Differences in Health: What the COVID-19 Pandemic Can Teach Us. *Ann Intern Med*. 2020;173(5):385-386. doi:10.7326/M20-1941

- 1  
2  
3 41. Kelada M, Anto A, Dave K, Saleh SN. The Role of Sex in the Risk of Mortality From COVID-19  
4 Amongst Adult Patients: A Systematic Review. *Cureus*. 2020;12(8):e10114. Published 2020  
5 Aug 29. doi:10.7759/cureus.10114  
6  
7 42. Raparelli V, Palmieri L, Canevelli M, et al. Sex differences in clinical phenotype and  
8 transitions of care among individuals dying of COVID-19 in Italy. *Biol Sex Differ*.  
9 2020;11(1):57. Published 2020 Oct 16. doi:10.1186/s13293-020-00334-3  
10  
11 43. Marconi M. Gender differences in Covid-19: the importance of sex-disaggregated data.  
12 *Ital J Gender-Specific Med* 2021; 7(1): 4-6  
13  
14 44. Huang C, Huang L, Wang Y, et al. 6-month consequences of COVID-19 in patients  
15 discharged from hospital: a cohort study. *Lancet*. 2021 Jan 16;397(10270):220-232. doi:  
16 10.1016/S0140-6736(20)32656-8.  
17  
18 45. Sudre CH, Murray B, Varsavsky T, et al. Attributes and predictors of long COVID. *Nat Med*.  
19 2021 Apr;27(4):626-631. doi: 10.1038/s41591-021-01292-y.  
20  
21 46. Ngo ST, Steyn FJ, McCombe PA. Gender differences in autoimmune disease. *Front*  
22 *Neuroendocrinol*. 2014 Aug;35(3):347-69. doi: 10.1016/j.yfrne.2014.04.004.  
23  
24 —Greenhalgh T, Knight M, A'Court C, Buxton M, Husain L. Management of post-acute  
25 covid-19 in primary care. *BMJ*. 2020;370:m3026. Published 2020 Aug 11.  
26 doi:10.1136/bmj.m3026  
27  
28  
29 The Lancet, Editorial. Facing up to long COVID. *Lancet*. 2020 Dec 12;396(10266):1861  
30  
31 Amenta EM, Spallone A, Rodriguez-Barradas MC, El Sahly HM, Atmar RL, Kulkarni PA.  
32 Postacute COVID-19: An Overview and Approach to Classification. *Open Forum Infect Dis*.  
33 2020;7(12):ofaa509. Published 2020 Oct 21. doi:10.1093/ofid/ofaa509  
34  
35  
36  
37  
38  
39  
40  
41  
42  
43  
44  
45  
46  
47  
48  
49  
50  
51  
52  
53  
54  
55  
56  
57  
58  
59  
60



STROBE Statement—Checklist of items that should be included in reports of *cross-sectional studies*

|                              | Item No | Recommendation                                                                                                                                                                                    | Page No       |
|------------------------------|---------|---------------------------------------------------------------------------------------------------------------------------------------------------------------------------------------------------|---------------|
| <b>Title and abstract</b>    | 1       | (a) Indicate the study's design with a commonly used term in the title or the abstract                                                                                                            | 1             |
|                              |         | (b) Provide in the abstract an informative and balanced summary of what was done and what was found                                                                                               | 2             |
| <b>Introduction</b>          |         |                                                                                                                                                                                                   |               |
| Background/rationale         | 2       | Explain the scientific background and rationale for the investigation being reported                                                                                                              | 4             |
| Objectives                   | 3       | State specific objectives, including any prespecified hypotheses                                                                                                                                  | 4             |
| <b>Methods</b>               |         |                                                                                                                                                                                                   |               |
| Study design                 | 4       | Present key elements of study design early in the paper                                                                                                                                           | 4-5           |
| Setting                      | 5       | Describe the setting, locations, and relevant dates, including periods of recruitment, exposure, follow-up, and data collection                                                                   | 5             |
| Participants                 | 6       | (a) Give the eligibility criteria, and the sources and methods of selection of participants                                                                                                       | 5             |
| Variables                    | 7       | Clearly define all outcomes, exposures, predictors, potential confounders, and effect modifiers. Give diagnostic criteria, if applicable                                                          | NA            |
| Data sources/<br>measurement | 8*      | For each variable of interest, give sources of data and details of methods of assessment (measurement). Describe comparability of assessment methods if there is more than one group              | 5             |
| Bias                         | 9       | Describe any efforts to address potential sources of bias                                                                                                                                         | NA            |
| Study size                   | 10      | Explain how the study size was arrived at                                                                                                                                                         | 6             |
| Quantitative variables       | 11      | Explain how quantitative variables were handled in the analyses. If applicable, describe which groupings were chosen and why                                                                      | 6             |
| Statistical methods          | 12      | (a) Describe all statistical methods, including those used to control for confounding                                                                                                             | 6             |
|                              |         | (b) Describe any methods used to examine subgroups and interactions                                                                                                                               | 6             |
|                              |         | (c) Explain how missing data were addressed                                                                                                                                                       | NA            |
|                              |         | (d) If applicable, describe analytical methods taking account of sampling strategy                                                                                                                | NA            |
|                              |         | (e) Describe any sensitivity analyses                                                                                                                                                             | 6             |
| <b>Results</b>               |         |                                                                                                                                                                                                   |               |
| Participants                 | 13*     | (a) Report numbers of individuals at each stage of study—eg numbers potentially eligible, examined for eligibility, confirmed eligible, included in the study, completing follow-up, and analysed | 6             |
|                              |         | (b) Give reasons for non-participation at each stage                                                                                                                                              | 5             |
|                              |         | (c) Consider use of a flow diagram                                                                                                                                                                | Figure 1, p.7 |
| Descriptive data             | 14*     | (a) Give characteristics of study participants (eg demographic, clinical, social) and information on exposures and potential confounders                                                          | 7-8           |
|                              |         | (b) Indicate number of participants with missing data for each variable of interest                                                                                                               | 8-9           |

|                          |     |                                                                                                                                                                                                              |                    |
|--------------------------|-----|--------------------------------------------------------------------------------------------------------------------------------------------------------------------------------------------------------------|--------------------|
| Outcome data             | 15* | Report numbers of outcome events or summary measures                                                                                                                                                         | 10                 |
| Main results             | 16  | (a) Give unadjusted estimates and, if applicable, confounder-adjusted estimates and their precision (eg, 95% confidence interval). Make clear which confounders were adjusted for and why they were included | 11-12;<br>Table 4. |
|                          |     | (b) Report category boundaries when continuous variables were categorized                                                                                                                                    | NA                 |
|                          |     | (c) If relevant, consider translating estimates of relative risk into absolute risk for a meaningful time period                                                                                             | NA                 |
| Other analyses           | 17  | Report other analyses done—eg analyses of subgroups and interactions, and sensitivity analyses                                                                                                               | 11-12              |
| <b>Discussion</b>        |     |                                                                                                                                                                                                              |                    |
| Key results              | 18  | Summarise key results with reference to study objectives                                                                                                                                                     | 12-13              |
| Limitations              | 19  | Discuss limitations of the study, taking into account sources of potential bias or imprecision. Discuss both direction and magnitude of any potential bias                                                   | 14                 |
| Interpretation           | 20  | Give a cautious overall interpretation of results considering objectives, limitations, multiplicity of analyses, results from similar studies, and other relevant evidence                                   | 12-14              |
| Generalisability         | 21  | Discuss the generalisability (external validity) of the study results                                                                                                                                        | 14                 |
| <b>Other information</b> |     |                                                                                                                                                                                                              |                    |
| Funding                  | 22  | Give the source of funding and the role of the funders for the present study and, if applicable, for the original study on which the present article is based                                                | 15                 |

\*Give information separately for exposed and unexposed groups.

**Note:** An Explanation and Elaboration article discusses each checklist item and gives methodological background and published examples of transparent reporting. The STROBE checklist is best used in conjunction with this article (freely available on the Web sites of PLoS Medicine at <http://www.plosmedicine.org/>, Annals of Internal Medicine at <http://www.annals.org/>, and Epidemiology at <http://www.epidem.com/>). Information on the STROBE Initiative is available at [www.strobe-statement.org](http://www.strobe-statement.org).

# BMJ Open

## Sex Differences and Rehabilitation Needs after Hospital Discharge for COVID-19: An Italian Cross-sectional Study.

|                                 |                                                                                                                                                                                                                                                                                                                                                                                                                                                                                                                                                                                                                                                                                                                                                                                                                                                                                                                                                                                                                                                                                                                                                                                                                                                                                                                                                                                                                                                                                                                                                                                                                                                                                                                                                                                           |
|---------------------------------|-------------------------------------------------------------------------------------------------------------------------------------------------------------------------------------------------------------------------------------------------------------------------------------------------------------------------------------------------------------------------------------------------------------------------------------------------------------------------------------------------------------------------------------------------------------------------------------------------------------------------------------------------------------------------------------------------------------------------------------------------------------------------------------------------------------------------------------------------------------------------------------------------------------------------------------------------------------------------------------------------------------------------------------------------------------------------------------------------------------------------------------------------------------------------------------------------------------------------------------------------------------------------------------------------------------------------------------------------------------------------------------------------------------------------------------------------------------------------------------------------------------------------------------------------------------------------------------------------------------------------------------------------------------------------------------------------------------------------------------------------------------------------------------------|
| Journal:                        | <i>BMJ Open</i>                                                                                                                                                                                                                                                                                                                                                                                                                                                                                                                                                                                                                                                                                                                                                                                                                                                                                                                                                                                                                                                                                                                                                                                                                                                                                                                                                                                                                                                                                                                                                                                                                                                                                                                                                                           |
| Manuscript ID                   | bmjopen-2021-055308.R2                                                                                                                                                                                                                                                                                                                                                                                                                                                                                                                                                                                                                                                                                                                                                                                                                                                                                                                                                                                                                                                                                                                                                                                                                                                                                                                                                                                                                                                                                                                                                                                                                                                                                                                                                                    |
| Article Type:                   | Original research                                                                                                                                                                                                                                                                                                                                                                                                                                                                                                                                                                                                                                                                                                                                                                                                                                                                                                                                                                                                                                                                                                                                                                                                                                                                                                                                                                                                                                                                                                                                                                                                                                                                                                                                                                         |
| Date Submitted by the Author:   | 29-Mar-2022                                                                                                                                                                                                                                                                                                                                                                                                                                                                                                                                                                                                                                                                                                                                                                                                                                                                                                                                                                                                                                                                                                                                                                                                                                                                                                                                                                                                                                                                                                                                                                                                                                                                                                                                                                               |
| Complete List of Authors:       | <p>Fugazzaro, Stefania; Azienda Unità Sanitaria Locale - IRCCS Tecnologie Avanzate e Modelli Assistenziali in Oncologia di Reggio Emilia, Physical Medicine and Rehabilitation Unit</p> <p>Denti, Monica; Azienda USL - IRCCS di Reggio Emilia, Physical Medicine and Rehabilitation Unit</p> <p>Mainini, Carlotta; Azienda Unità Sanitaria Locale - IRCCS Tecnologie Avanzate e Modelli Assistenziali in Oncologia di Reggio Emilia, Physical Medicine and Rehabilitation Unit</p> <p>Accogli, Monia; Azienda Unità Sanitaria Locale - IRCCS Tecnologie Avanzate e Modelli Assistenziali in Oncologia di Reggio Emilia, Physical Medicine and Rehabilitation Unit</p> <p>Bedogni, Ginevra; Azienda Unità Sanitaria Locale - IRCCS Tecnologie Avanzate e Modelli Assistenziali in Oncologia di Reggio Emilia, Physical Medicine and Rehabilitation Unit</p> <p>Ghizzoni, Daniele; Private Hospital Villa Verde Srl, Physiotherapy Service</p> <p>Bertolini, Anna; Bachelor' degree in OT , Department of Medical and Sugical Sciences;University of Modena e Reggio</p> <p>Esseroukh, Otmen; Bachelor's degree PT, Department of Surgery, Medicine, DentristY and Morphological Sciences; University of Modena e Reggio Emilia</p> <p>Gualdi, Cecilia; Bachelor's degree PT, Department of Surgery, Medicine, DentristY and Morphological Sciences; University of Modena e Reggio Emilia</p> <p>Schiavi, Margherita; Azienda USL - IRCCS di Reggio Emilia, Department of Health Professions</p> <p>Braglia, Luca; Azienda USL - IRCCS di Reggio Emilia, Research and Statistic Infrastructure</p> <p>Costi, Stefania; Azienda USL - IRCCS di Reggio Emilia, Scientific Directorate; Bachelor' degree in OT , Department of Medical and Sugical Sciences;University of Modena e Reggio</p> |
| <b>Primary Subject Heading</b>: | Rehabilitation medicine                                                                                                                                                                                                                                                                                                                                                                                                                                                                                                                                                                                                                                                                                                                                                                                                                                                                                                                                                                                                                                                                                                                                                                                                                                                                                                                                                                                                                                                                                                                                                                                                                                                                                                                                                                   |
| Secondary Subject Heading:      | Respiratory medicine                                                                                                                                                                                                                                                                                                                                                                                                                                                                                                                                                                                                                                                                                                                                                                                                                                                                                                                                                                                                                                                                                                                                                                                                                                                                                                                                                                                                                                                                                                                                                                                                                                                                                                                                                                      |
| Keywords:                       | COVID-19, REHABILITATION MEDICINE, Respiratory infections < THORACIC MEDICINE                                                                                                                                                                                                                                                                                                                                                                                                                                                                                                                                                                                                                                                                                                                                                                                                                                                                                                                                                                                                                                                                                                                                                                                                                                                                                                                                                                                                                                                                                                                                                                                                                                                                                                             |
|                                 |                                                                                                                                                                                                                                                                                                                                                                                                                                                                                                                                                                                                                                                                                                                                                                                                                                                                                                                                                                                                                                                                                                                                                                                                                                                                                                                                                                                                                                                                                                                                                                                                                                                                                                                                                                                           |

1  
2  
3  
4  
5  
6  
7  
8  
9  
10  
11  
12  
13  
14  
15  
16  
17  
18  
19  
20  
21  
22  
23  
24  
25  
26  
27  
28  
29  
30  
31  
32  
33  
34  
35  
36  
37  
38  
39  
40  
41  
42  
43  
44  
45  
46  
47  
48  
49  
50  
51  
52  
53  
54  
55  
56  
57  
58  
59  
60



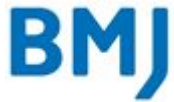

I, the Submitting Author has the right to grant and does grant on behalf of all authors of the Work (as defined in the below author licence), an exclusive licence and/or a non-exclusive licence for contributions from authors who are: i) UK Crown employees; ii) where BMJ has agreed a CC-BY licence shall apply, and/or iii) in accordance with the terms applicable for US Federal Government officers or employees acting as part of their official duties; on a worldwide, perpetual, irrevocable, royalty-free basis to BMJ Publishing Group Ltd ("BMJ") its licensees and where the relevant Journal is co-owned by BMJ to the co-owners of the Journal, to publish the Work in this journal and any other BMJ products and to exploit all rights, as set out in our [licence](#).

The Submitting Author accepts and understands that any supply made under these terms is made by BMJ to the Submitting Author unless you are acting as an employee on behalf of your employer or a postgraduate student of an affiliated institution which is paying any applicable article publishing charge ("APC") for Open Access articles. Where the Submitting Author wishes to make the Work available on an Open Access basis (and intends to pay the relevant APC), the terms of reuse of such Open Access shall be governed by a Creative Commons licence – details of these licences and which [Creative Commons](#) licence will apply to this Work are set out in our licence referred to above.

Other than as permitted in any relevant BMJ Author's Self Archiving Policies, I confirm this Work has not been accepted for publication elsewhere, is not being considered for publication elsewhere and does not duplicate material already published. I confirm all authors consent to publication of this Work and authorise the granting of this licence.

## Title page

**Sex Differences and Rehabilitation Needs after Hospital Discharge for COVID-19: An Italian Cross-sectional Study**

Stefania FUGAZZARO<sup>a</sup> MD, Monica DENTI<sup>a</sup> PT, Carlotta MAININI<sup>a</sup> PT, Monia Allisen ACCOGLI<sup>a</sup> PT, Ginevra BEDOGNI<sup>a</sup> MD, Daniele GHIZZONI<sup>b</sup> MD, Anna BERTOLINI<sup>c</sup> OT, Otmen ESSEROUKH<sup>d</sup> PT, Cecilia GUALDI<sup>d</sup> PT, Margherita SCHIAVI<sup>e</sup> OT, Luca BRAGLIA<sup>f</sup> MSc, Stefania COSTI<sup>d,g</sup> PhD

<sup>a</sup> Physical Medicine and Rehabilitation Unit, Azienda Unità Sanitaria Locale - IRCCS di Reggio Emilia, Viale Risorgimento n°80, 42123 Reggio Emilia, Italy;

<sup>b</sup> Physiotherapy Service, Casa di Cura Villa Verde, Viale Lelio Basso n° 1, 42124 Reggio Emilia, Italy;

<sup>c</sup> Bachelor's degree program in OT, Department of Medical and Surgical Sciences, University of Modena Reggio Emilia, Modena, Via del Pozzo n° 71, 41124, Italy.

<sup>d</sup> Bachelor's degree program in PT, Department of Surgery, Medicine, Dentistry and Morphological Sciences, University of Modena and Reggio Emilia, Via del Pozzo n° 71, 41124 Modena, Italy;

<sup>e</sup> Department of Health Professions, Azienda Unità Sanitaria Locale - IRCCS di Reggio Emilia, Via Amendola n° 2, Reggio Emilia, Italy

<sup>f</sup> Research and Statistic Infrastructure, Azienda Unità Sanitaria Locale – IRCCS Reggio Emilia, Viale Umberto I n°50, Reggio Emilia, Italy

<sup>g</sup> Scientific Directorate, Azienda Unità Sanitaria Locale - IRCCS di Reggio Emilia, Viale Umberto I n°50, 42123 Reggio Emilia, Italy;

## Corresponding author:

Monica Denti, Physical Medicine and Rehabilitation Unit, Azienda Unità Sanitaria Locale-IRCCS di Reggio Emilia, Viale Risorgimento n° 80, 42123 Reggio Emilia, Italy;

E-mail: [monica.denti@ausl.re.it](mailto:monica.denti@ausl.re.it)/ [monica.denti91@gmail.com](mailto:monica.denti91@gmail.com)

ORCID = <https://orcid.org/0000-0001-6541-2696>

Word count: 3484 words of text.

## Abstract

**Objectives:** Coronavirus disease 2019 (COVID-19) can result in persistent symptoms leaving potential rehabilitation needs unmet. This study aims to describe persistent symptoms and health status of individuals hospitalized for COVID-19 according to the International Classification of Functioning, Disability and Health (ICF) domains of impairments, limitations in activity, and participation restrictions.

**Design:** Cross-sectional study consisting in a telephone interview three months after hospital discharge.

**Setting:** This study was conducted during the first peak of the COVID-19 pandemic by the Local Health Authority of Reggio Emilia (Italy).

**Participants:** Adult individuals discharged from hospital between April and June 2020 after COVID-19. Exclusion criteria: hospitalization for reasons other than COVID-19, inability to participate in the study, concomitant acute or chronic conditions causing disability.

**Primary and secondary outcome measures:** We assessed: dyspnea (Medical Research Council), fatigue (Fatigue Severity Scale), mood disturbances (Hospital Anxiety and Depression Scale), limitations in activity (Barthel Index) and participation restrictions (Reintegration to Normal Living Index). We also collected data on sociodemographic characteristics, health status prior to COVID-19, COVID-related clinical manifestations and hospital care pathway up to discharge, rehabilitation interventions, accidental falls and emergency room access.

**Results:** 149 participants (men, 62%; average age 62 ( $\pm 11$ ) years) were enrolled, 35 of which (23%) were admitted to the ICU while hospitalized. Three months after hospital discharge, nearly half of the participants still suffered from dyspnea (44%) or fatigue (39%). Almost all individuals (91.2%) recovered a good level of independence in activity of daily living, but 76% still suffered participation restrictions. Female sex was significantly associated with worse outcomes for all symptoms.

**Conclusions:** Individuals who had moderate or severe COVID-19 may perceive persistent symptoms which may result in reduced social participation. Sex differences should be monitored, as women may recover more slowly than men.

**Trial Registration:** This independent observational study was registered on ClinicalTrials.com (NCT04438239).

**Key Words:** COVID-19, rehabilitation medicine, respiratory infections.

1  
2  
3  
4  
5  
6  
7  
8  
9  
10  
11  
12  
13  
14  
15  
16  
17  
18  
19  
20  
21  
22  
23  
24  
25  
26  
27  
28  
29  
30  
31  
32  
33  
34  
35  
36  
37  
38  
39  
40  
41  
42  
43  
44  
45  
46  
47  
48  
49  
50  
51  
52  
53  
54  
55  
56  
57  
58  
59  
60

## Article Summary

- This cross-sectional study investigated the long-term impact of COVID-19 on functional status of patients after hospital discharge.
- The telephone interviews collected data of patients discharged from the hospitals of the Local Health Authority of the Province of Reggio Emilia (Italy) only.
- To catch post-acute sequelae of SARS-COV2 infection, individuals with acute or chronic concomitant conditions causing disability and with previous complete dependence in activities of daily living (ADLs) were excluded.
- Eligible individuals were contacted by a letter of invitation and, if necessary, also by phone.
- Sociodemographic characteristics, health status prior to COVID-19, data regarding COVID-related hospital care and long-term health outcomes were collected.



## Introduction

### Background

The onset of the coronavirus disease 2019 (COVID-19) pandemic in early 2020 had a tremendous impact on the world population and on healthcare systems, with over 273 million cases worldwide as of December 19, 2021.<sup>1</sup> Early reports about surveillance were promptly released, and a tremendous effort was made to increase knowledge of diffusion patterns and prevention strategies. The presenting features of Severe Acute Respiratory Syndrome - Coronavirus 2 (SARS-CoV-2) infection have been well described, with a widely accepted categorization of acute COVID-19 published by the World Health Organization (WHO)<sup>2</sup> and updated regularly. According to the WHO classification of COVID-19, which includes asymptomatic, mild, moderate, severe, and critical disease,<sup>2</sup> 14-15% of cases have been severe and 5% critical.<sup>3</sup> However, for the first months of the pandemic, the long-term impact of the disease remained underexplored.

COVID-19 patients admitted to hospital experience fever, cough, dyspnea, muscle soreness, and/or acute respiratory distress syndrome, but also fatigue, gastrointestinal symptoms, and headache.<sup>4</sup> While most patients recover quickly, a growing number of studies have highlighted that several survivors of COVID-19 experience a multisystem condition termed post-acute sequelae of SARS-CoV-2 infection (PASC) characterized by fatigue, dyspnea, brain fog, headache, mood disturbances, and atypical chest pain.<sup>5</sup> These symptoms can last several weeks after the acute phase of the disease and may worsen functioning and quality of life and hinder participation<sup>6-13</sup>. Furthermore, in the presence of comorbidities, they may lead to deconditioning, fatigue, and social isolation.<sup>14</sup>

The International Classification of Functioning, Disability and Health (ICF) is a classification of health and health-related domains which measures health and disability at both the individual and population levels<sup>15</sup>. To our knowledge, no clinical trial has comprehensively assessed the persistent impact of COVID-19 according to the ICF,<sup>15</sup> although this assessment has been recommended to explore the long-term impairments but also limitations in activity and participation restrictions caused by SARS-CoV-2 infection.<sup>6</sup> This study aimed to verify whether individuals who had been hospitalized for COVID-19 had unmet rehabilitation needs lasting long beyond recovery.

### Objective

This study describes the persistent symptoms and impairments, limitations in activity, and restrictions in participation in social activities of those individuals who required hospitalization for COVID-19. It investigated the associations between sociodemographic characteristics, health status prior to COVID-19, COVID-related clinical manifestations and symptoms, and hospital care pathway up to discharge and health outcomes assessed three months after hospital discharge.

## Methods

### *Study design and population*

1  
2  
3 This cross-sectional study is reported according to the Strengthening The Reporting of OBServational  
4 studies in Epidemiology (STROBE) guidelines.<sup>16</sup> The study consisted in a telephone interview of  
5 patients hospitalized for COVID-19 during the first peak of the pandemic to collect current and  
6 retrospective data. All adult symptomatic individuals, discharged from the hospitals of the Local  
7 Health Authority (LHA) of the Province of Reggio Emilia (Italy) between April and June 2020, were  
8 screened for eligibility by medical documentation. We excluded individuals who a) were hospitalized  
9 for reasons other than COVID-19; b) were unable to participate in the study procedures (e.g.,  
10 dementia, psychiatric disorders, linguistic barriers, etc.); c) had acute or chronic concomitant  
11 conditions causing disability (e.g., recent stroke, surgical interventions, heart failure, etc.); d) had  
12 previous complete dependence in activities of daily living (ADLs). We also excluded pregnant  
13 women to avoid a confounding effect of pregnancy on symptoms like fatigue or dyspnea. The study  
14 was approved by the local Ethics Committee (prot. 2020/0133, April 21, 2020). Due to the  
15 concomitant pandemic, it was not possible to involve patients or the public in the design,  
16 conduction, reporting, or dissemination of this study.

17  
18 All eligible individuals were sent a letter of invitation to participate in this study, written information  
19 about the study, a consent form and the principal investigator's request for permission for a  
20 researcher affiliated with the study to contact the individual by phone. Two weeks after the letter  
21 was sent, the potentially eligible individuals were contacted by a researcher, who gave them any  
22 further information, and asked that they return the written informed consent to participate in the  
23 interview. Individuals who did not answer the phone after three attempts and those who explicitly  
24 stated they did not intend to participate in the study were deleted from the list.

25  
26 We retrospectively collected the following data of each participant:

- 27 ● sociodemographic characteristics (age, sex, household composition)
- 28 ● health status prior to COVID-19 (comorbidities, use of aids, and level of independence prior  
29 to hospitalization)
- 30 ● data regarding COVID-related hospital care
- 31 ● symptoms and clinical manifestation of COVID-19 (e.g., cough, fever, diarrhea, asthenia,  
32 localization of pneumonia, respiratory failure)
- 33 ● admission to the intensive care unit (ICU) and its duration
- 34 ● any rehabilitation treatment during hospitalization (e.g., mobilization, chest physiotherapy)
- 35 ● length of stay (LOS)

36  
37 Three months from hospital discharge, participants were interviewed by telephone to collect data  
38 on the persistency of the following symptoms and limitations:

- 39 ● dyspnea, assessed by the Medical Research Council (MRC)<sup>17</sup>
- 40 ● fatigue, assessed by the Fatigue Severity Scale (FSS)<sup>18</sup>
- 41 ● mood disturbances, assessed by the Hospital Anxiety and Depression Scale (HADS)<sup>19</sup>
- 42 ● limitations in basic activities of daily living (B-ADL), assessed by the Barthel Index (BI)<sup>20</sup>
- 43 ● restrictions in participation, assessed by the Reintegration to Normal Living Index (RNLI)<sup>21</sup>  
44 (Italian version)

1  
2  
3 Data on any rehabilitation intervention implemented after hospital discharge (type, duration,  
4 frequency) and on any accidental falls and related consequences, emergency room access, or any  
5 further hospital admissions after hospital discharge were also collected.  
6  
7

### 8 9 *Statistical analysis*

10  
11 In absence of an a priori hypothesis, given the exploratory nature of the study, no formal sample  
12 size calculation was performed; all eligible individuals who agreed to participate in the study were  
13 recruited. Sociodemographic characteristics, health status prior to COVID-19, COVID-related clinical  
14 manifestations and symptoms, and hospital care pathway up to discharge are reported, as are the  
15 data on long-term outcomes of COVID-19. Data are reported as frequency and percentage for  
16 categorical variables, mean and standard deviation for symmetric quantitative variables, and  
17 median and interquartile range (IQR) for skewed variables.  
18  
19

20  
21 Proportions between groups were compared using the chi-square test or the Fisher's exact test.  
22 Associations between potential exposures and long-term outcomes were investigated using logistic  
23 regression models. Similarly, associations between the presence of long-term outcomes of COVID-  
24 19 and rehabilitation interventions, accidental falls/fractures, emergency room accesses, and/ or  
25 any hospital admission in the three months following hospital discharge were investigated. Unless  
26 otherwise specified, confidence intervals are two-tailed and calculated at the 0.95 confidence level.  
27 Tests were considered statistically significant when the P value was < 0.05. Statistical analysis was  
28 performed using R 3.5.2 R Core Team 2020.<sup>22</sup>  
29  
30  
31  
32

33  
34 *Patient and Public Involvement:* Due to the concomitant pandemic, it was not possible to involve  
35 patients or the public in the design, conduction, reporting, or dissemination of this study.  
36  
37  
38  
39

## 40 **Results**

### 41 42 *Participants*

43  
44 Between April and June 2020, 784 patients were discharged from the hospitals of the LHA of Reggio  
45 Emilia (Italy), which serves a population of 533 158 residents, after being healed from the acute  
46 phase of COVID-19. Overall, 446 individuals were excluded for the reasons listed in Figure 1; 338  
47 invitations to participate in the study were mailed to potentially eligible individuals, who were  
48 contacted by telephone two weeks later. Overall, 150 individuals consented to participate, and a  
49 telephone appointment for the interview was set up. One individual could not be reached for the  
50 interview, and his data were excluded from the analysis. Thus, 149 participants were interviewed  
51 between June and September 2020, at an average of 104 days ( $\pm 18.5$ ) from hospital discharge.  
52 Figure 1 reports the flow diagram of the study participants.  
53  
54  
55  
56  
57  
58  
59

60 Insert Figure 1 near here

### Descriptive data

The sociodemographic characteristics and health status of study participants are reported in Table 1. The average age of the study cohort was 62 ( $\pm 11$ ) years. Males accounted for 62.4% of the sample, and 51% were employed. Most participants lived with family members (89.3%) and had one or more comorbidities (82.6%), the most frequent being cardiovascular diseases (34.6%), metabolic diseases (15.6%), diabetes (8.7%), and obesity (8%). Before hospitalization for COVID-19, all but one participant were independent in B-ADL, and only 6% used walking aids for mobility.

**Table 1.** Sociodemographic characteristics and health status of the cohort

| Sociodemographic characteristics and health status                | TOTAL (N=149)    |
|-------------------------------------------------------------------|------------------|
| Age, mean (SD)                                                    | 62( $\pm 11.5$ ) |
| Sex, N (%)                                                        |                  |
| Male                                                              | 93 (62.4)        |
| Female                                                            | 56 (37.6)        |
| Household conditions, N (%)                                       |                  |
| Alone                                                             | 15 (10.0)        |
| With others                                                       | 133 (89.3)       |
| Data missing                                                      | 1 (0.7)          |
| Occupation, N (%)                                                 |                  |
| Employed                                                          | 76 (51.0)        |
| Retired                                                           | 66 (44.3)        |
| Unemployed                                                        | 7 (4.7)          |
| Smoker, N (%)                                                     |                  |
| Yes                                                               | 11 (7.4)         |
| No                                                                | 92 (61.7)        |
| Ex-smoker                                                         | 46 (30.9)        |
| Comorbidities, N (%)                                              |                  |
| No                                                                | 26 (17.4)        |
| Yes                                                               | 123 (82.6)       |
| N of comorbidities per patient, N (%)                             |                  |
| 0                                                                 | 26 (17.4)        |
| 1                                                                 | 43 (28.9)        |
| 2                                                                 | 39 (26.2)        |
| 3                                                                 | 23 (15.4)        |
| >3                                                                | 18 (12.1)        |
| Type of comorbidities, N (%), (Total N=263)                       |                  |
| Cardiovascular diseases                                           | 91 (34.6)        |
| Metabolic diseases (dyslipidemia, gout, fatty liver disease, etc) | 41 (15.6)        |
| Diabetes                                                          | 23 (8.7)         |
| Obesity (BMI $\geq 30$ )                                          | 21 (8.0)         |
| Digestive system diseases                                         | 16 (6.1)         |
| Respiratory diseases                                              | 10 (3.8)         |

|                                               |            |
|-----------------------------------------------|------------|
| Hematological diseases                        | 8 (3.0)    |
| Rheumatological diseases                      | 8 (3.0)    |
| Others                                        | 45 (17.1)  |
| Independence before hospital admission, N (%) |            |
| Yes                                           | 148 (99.3) |
| Minimal assistance for ADL                    | 1 (0.7)    |
| Use of aids before hospital admission, N (%)  |            |
| Yes                                           | 9 (6.0)    |
| No                                            | 140 (94.0) |

Legend: SD = Standard Deviation; N = Number; BMI = Body Mass Index; ADL = Activities of Daily Living

Table 2 reports data regarding the hospital care of participants, showing intensive care unit (ICU) admissions and sex-disaggregated data. Thirty-five individuals (23.5%) were admitted to the ICU. Overall, the average LOS was 18 ( $\pm$ 14) days, with a higher average LOS for individuals admitted to the ICU (33  $\pm$ 20 days). Most participants experienced respiratory failure (83.9%), with 12.1% having documented bilateral pneumonia.

Inpatient rehabilitation was delivered to 21 individuals, corresponding to 14.1% of the total sample and to 51.4% of participants admitted to the ICU. Early mobilization was offered to patients in the ICU and to patients hospitalized in acute wards, if they presented severe risk of functional limitations due to frailty or mobility limitations. Inpatient rehabilitation was performed six days per week and included pulmonary rehabilitation, mobilization, exercises, and counseling. Also, as soon as patients could self-manage a program of simple exercise, the physiotherapist gave them instructions and written information to guide them in the execution of breathing exercises, active range of motion exercises, and strength training while lying supine or sitting.

Outpatient rehabilitation after hospital discharge was attended by 21 individuals (14.1%), several of whom had been admitted to the ICU (40.0%). Outpatient rehabilitation was provided three times per week at the Physical Therapy Department and consisted in comprehensive pulmonary rehabilitation to improve persistent fatigue, exercise capacity, and breathlessness. It included breathing techniques such as pursed lip breathing, Positive Expiratory Pressure (PEP)-bottle exercises, and incentive spirometer. Patients were advised to continue the exercises at home, with individualized home sessions based on their needs (repeating breathing techniques, performing aerobic exercise, balance exercises, or resistance training).

Seventeen participants (11.4%) reported using a walking aid for mobility after hospital discharge (wheelchair, walker, stick, crutches). Moreover, accidental falls after hospital discharge were reported by 6.7% of participants, but only one resulted in emergency room access.

**Table 2.** Hospital care of participants and post-discharge period.

| Information about patients' hospital care and post-discharge | Sex-disaggregated data |            |             |               |               |
|--------------------------------------------------------------|------------------------|------------|-------------|---------------|---------------|
|                                                              | TOTAL                  | ICU        | Not-ICU     | Male (N=93)   | Female (N=56) |
| Hospital care, N (%)                                         | 149 (100%)             | 35 (23.5%) | 114 (76.5%) | ICU 26 (28.0) | ICU 9 (16.1)  |

1  
2  
3  
4  
5  
6  
7  
8  
9  
10  
11  
12  
13  
14  
15  
16  
17  
18  
19  
20  
21  
22  
23  
24  
25  
26  
27  
28  
29  
30  
31  
32  
33  
34  
35  
36  
37  
38  
39  
40  
41  
42  
43  
44  
45  
46  
47  
48  
49  
50  
51  
52  
53  
54  
55  
56  
57  
58  
59  
60

|                                                                 |                |                |               | Not-ICU 67<br>(72.0) | Not-ICU 47<br>(83.9) |
|-----------------------------------------------------------------|----------------|----------------|---------------|----------------------|----------------------|
| Total LOS, mean (SD)                                            | 18 ( $\pm$ 14) | 33 ( $\pm$ 20) | 14 ( $\pm$ 8) | 18.7 ( $\pm$ 13.9)   | 17.4 ( $\pm$ 15.4)   |
| LOS in ICU, mean (SD)                                           |                | 14 ( $\pm$ 11) |               | 13.2 ( $\pm$ 10.8)   | 16.1 ( $\pm$ 13.8)   |
| Symptoms at admission, N (%)                                    |                |                |               |                      |                      |
| Respiratory failure                                             | 125 (83.9)     | 35 (100)       | 90 (78.9)     | 80 (86.0)            | 46 (82.1)            |
| Bilateral pneumonia                                             | 18 (12.1)      | 0 (0)          | 18 (15.8)     | 11 (11.8)            | 7 (12.5)             |
| Mild symptoms                                                   | 4 (2.7)        | 0 (0)          | 4 (3.5)       | 2 (2.2)              | 2 (3.6)              |
| Other (pulmonary embolism)                                      | 2 (1.3)        | 0 (0)          | 2 (1.8)       | 0 (0)                | 1 (1.8)              |
| Clinical Category of COVID-19 and Type of Oxygen support, N (%) |                |                |               |                      |                      |
| Critical COVID-19<br>(CPAP-NIV-intubation)                      | 56 (37.6)      | 35 (100)       | 21 (18.4)     | 43 (46.2)            | 13 (23.2)            |
| Severe COVID-19<br>(HF oxygen devices)                          | 61 (40.9)      | 0 (0)          | 61 (53.6)     | 33 (35.5)            | 28 (50.0)            |
| Moderate COVID-19<br>(LF oxygen devices)                        | 16 (10.7)      | 0 (0)          | 16 (14.0)     | 9 (9.7)              | 7 (12.5)             |
| Mild COVID-19<br>(no oxygen support)                            | 16 (10.7)      | 0 (0)          | 16 (14.0)     | 8 (8.6)              | 8 (14.3)             |
| Rehabilitation during hospitalization, N (%)                    |                |                |               |                      |                      |
| No                                                              | 128 (85.9)     | 17 (48.6)      | 111 (97.4)    | 81 (87.1)            | 47 (83.9)            |
| Yes                                                             | 21 (14.1)      | 18 (51.4)      | 3 (2.6)       | 12 (12.9)            | 9 (16.1)             |
| Rehabilitation after discharge, N (%)                           |                |                |               |                      |                      |
| No                                                              | 128 (85.9)     | 21 (60.0)      | 107 (93.9)    | 80 (86.0)            | 48 (85.7)            |
| Yes                                                             | 21 (14.1)      | 14 (40.0)      | 7 (6.1)       | 13 (14.0)            | 8 (14.3)             |
| Use of aids after discharge, N (%)                              |                |                |               |                      |                      |
| No                                                              | 132 (88.6)     | 26 (74.3)      | 106 (93.0)    | 85 (91.4)            | 47 (83.9)            |
| Yes                                                             | 17 (11.4)      | 9 (25.7)       | 8 (7.0)       | 8 (8.6)              | 9 (16.1)             |
| Accidental falls after discharge, N (%)                         |                |                |               |                      |                      |
| No                                                              | 139 (93.3)     | 32 (91.4)      | 107 (93.9)    | 88 (94.6)            | 51 (91.1)            |
| Yes                                                             | 10 (6.7)       | 3 (8.6)        | 7 (6.1)       | 5 (5.4)              | 5 (8.9)              |

Legend: ICU = Intensive Care Unit; LOS= Length Of Stay; CPAP = Continuous Positive Airway Pressure; NIV = Non-Invasive Ventilation; HF = High Flow; LF = Low Flow.

### Outcome data

Table 3 describes the persistent symptoms, limitations in activity, and restrictions in participation three months after hospital discharge. Fatigue and dyspnea were the most prevalent persistent symptoms in the cohort investigated: 87.9% of participants experienced fatigue and 43% suffered from mild to severe dyspnea. Clinically relevant anxiety and depression scores (HADS  $\geq$ 8) were detected in 24.8% and 16.1% of participants, respectively.

Most of the sample (91.3%) was completely independent, with only a few individuals (11) reporting need for assistance in B-ADL. Nevertheless, three months after discharge, only 24.2% of participants were completely reintegrated, while 75.1% reported moderate (RNLI 60-99) or even severe (RNLI <60) restrictions in participation (67.1% and 8.0%, respectively).

**Table 3.** Persistent symptoms, limitations in activity and restrictions in participation three months after hospital discharge

| Outcome                            | Male (=93) | Female (=56) | Total (=149) |
|------------------------------------|------------|--------------|--------------|
| Dyspnea, N (%)                     |            |              |              |
| Absent (MRC =0)                    | 59 (63.4)  | 24 (42.9)    | 83 (55.7)    |
| Mild (MRC =1)                      | 26 (28.0)  | 17 (30.3)    | 43 (28.9)    |
| Moderate (MRC 2-3)                 | 6 (6.4)    | 13 (23.2)    | 19 (12.8)    |
| Severe (MRC =4)                    | 1 (1.1)    | 1 (1.8)      | 2 (1.3)      |
| Data missing <sup>(a)</sup>        | 1 (1.1)    | 1 (1.8)      | 2 (1.3)      |
| Fatigue, n (%)                     |            |              |              |
| Absent (FSS =9)                    | 13 (14.0)  | 3 (5.4)      | 16 (10.7)    |
| Mild-moderate (FSS 10-36)          | 54 (58.0)  | 19 (33.9)    | 73 (49.0)    |
| Severe (FSS >36)                   | 25 (26.9)  | 33 (58.9)    | 58 (38.9)    |
| Data missing <sup>(a)</sup>        | 1 (1.1)    | 1 (1.8)      | 2 (1.3)      |
| Anxiety, N (%)                     |            |              |              |
| No (HADS-a <8)                     | 76 (81.7)  | 35 (62.5)    | 111 (74.5)   |
| Yes (HADS-a ≥8)                    | 16 (17.2)  | 21 (37.5)    | 37 (24.8)    |
| Data missing <sup>(a)</sup>        | 1 (1.1)    | 0 (0.0)      | 1 (0.7)      |
| Depression, N (%)                  |            |              |              |
| No (HADS-d <8)                     | 84 (90.3)  | 40 (71.4)    | 124 (83.2)   |
| Yes (HADS-d ≥8)                    | 8 (8.6)    | 16 (28.6)    | 24 (16.1)    |
| Data missing <sup>(a)</sup>        | 1 (1.1)    | 0 (0.0)      | 1 (0.7)      |
| Limitation in B-ADL, N (%)         |            |              |              |
| Independent (BI =100)              | 88 (94.6)  | 48 (85.7)    | 136 (91.3)   |
| Mild dependence (BI 91-99)         | 2 (2.2)    | 5 (8.9)      | 7 (4.7)      |
| Moderate dependence (BI 61-90)     | 2 (2.2)    | 2 (3.6)      | 4 (2.7)      |
| Severe dependence (BI 21-60)       | 0 (0.0)    | 0 (0.0)      | 0 (0.0)      |
| Complete dependence (BI 0-20)      | 0 (0.0)    | 0 (0.0)      | 0 (0.0)      |
| Data missing <sup>(a)</sup>        | 1 (1.1)    | 1 (1.8)      | 2 (1.3)      |
| Participation, N (%)               |            |              |              |
| Complete reintegration (RNLI =100) | 32 (34.4)  | 4 (7.1)      | 36 (24.2)    |
| Reduced reintegration (RNLI 60-99) | 55 (59.1)  | 45 (80.4)    | 100 (67.1)   |
| Poor reintegration (RNLI <60)      | 5 (5.4)    | 7 (12.5)     | 12 (8.0)     |
| Data missing <sup>(a)</sup>        | 1 (1.1)    | 0 (0.0)      | 1 (0.7)      |

Legend: MRC=Medical Research Council; FSS= Fatigue Severity Scale; HADS-a= Hospital Anxiety and Depression Scale – anxiety; HADS-d= Hospital Anxiety and Depression Scale – depression; B-ADL = Basic Activities of Daily Living; BI= Barthel Index; RNLI=Reintegration to Normal Living Index.<sup>(a)</sup> impossibility of administering the assessments due to difficulties in understanding the questions during the phone call on behalf of the participant;

Table 4 shows the odds ratios (OR) of the associations between potential exposures and outcomes three months after discharge. Increasing age seemed to be associated with less anxiety (OR 0.94,  $p = 0.006$ ), as each year of age seemed to reduce the risk by about 5%. Similar results were detected for depression (OR 0.95,  $p = 0.036$ ).

Being female was associated with persistent symptoms after COVID-19: three months after hospital discharge, 25% of females versus 7.5% of males suffered from dyspnea (OR 3.61,  $p = 0.019$ ), 59% of females versus 27% of males suffered from fatigue (OR 3.75,  $p < 0.001$ ), 37.5% of females versus 17% of males suffered from anxiety (OR 3.26,  $p = 0.007$ ), and 28.5% of females versus 8.6% of males suffered from depression (3.71,  $p = 0.011$ ); albeit not significantly, limitations in B-ADL were also more reported in females (14% versus 5.3%; OR 3.18,  $p = 0.078$ ).

Surprisingly, comorbidities were not associated with worse outcomes.

Dyspnea was more frequently reported by participants who used walking aids for mobility after discharge (OR 3.52,  $p = 0.042$ ) and by those who experienced an accidental fall (OR 5.02,  $p = 0.023$ ). Moreover, having had critical or severe COVID-19 was associated with a 70% reduction in the risk of anxiety (OR 0.29,  $p = 0.016$ ) and in the risk of depression, bordering on significance (OR 0.33,  $p = 0.062$ ).

Finally, accidental falls occurring after hospital discharge were associated with a fivefold increase in the risk of dyspnea (OR 5.02,  $p = 0.032$ ) and dependence in B-ADL (OR 5.51,  $p = 0.029$ ).

**Table 4.** Associations between potential exposures and outcomes three months after discharge.

| Risk factors                        | Dyspnea<br>OR [CI]<br>(p-value) | Fatigue<br>OR [CI]<br>(p-value) | Anxiety<br>OR [CI]<br>(p-value) | Depression<br>OR [CI]<br>(p-value) | Dependence<br>in B-ADL<br>OR [CI]<br>(p-value) | Reintegration<br>OR [CI]<br>(p-value) |
|-------------------------------------|---------------------------------|---------------------------------|---------------------------------|------------------------------------|------------------------------------------------|---------------------------------------|
| Age                                 | 1.00 [0.96-1.05] $p=0.806$      | 0.97 [0.93-1.00] $p=0.087$      | 0.94 [0.90-0.98] $p=0.006^*$    | 0.95 [0.90-0.99] $p=0.036^*$       | 1.05 [0.99-1.12] $p=(0.119)$                   | 0.95 [0.88-1.00] $p=0.102$            |
| Female sex                          | 3.61 [1.26-11.26] $p=0.019^*$   | 3.75 [1.75-8.26] $p<0.001^*$    | 3.26 [1.40-7.81] $p=0.007^*$    | 3.71 [1.39-10.69] $p=0.011^*$      | 3.18 [0.90-12.79] $p=0.078$                    | 2.59 [0.70-10.66] $p=0.157$           |
| Several comorbidities (>3)          | 1.03 [0.20-4.26] $p=0.970$      | 0.92 [0.29-1.47] $p=0.883$      | 1.26 [0.34-4.34] $p=0.709$      | 0.30 [0.01-1.89] $p=0.281$         | 0.57 [0.02-4.24] $p=0.630$                     | 2.66 [0.45-15.85] $p=0.260$           |
| Diabetes                            | 1.57 [0.40-5.09] $p=0.471$      | 0.98 [0.37-2.48] $p=0.965$      | 0.88 [0.26-2.49] $p=0.823$      | 0.45 [0.06-1.76] $p=0.317$         | 3.12 [0.75-11.57] $p=0.094$                    | 0.48 [0.02-2.77] $p=0.499$            |
| Cardiovascular diseases             | 1.80 [0.54-8.23] $p=0.380$      | 0.73 [0.32-1.66] $p=0.458$      | 0.62 [0.25-1.58] $p=0.311$      | 0.79 [0.28-2.44] $p=0.675$         | 0.60 [0.16-2.42] $p=0.438$                     | 1.46 [0.34-10.06] $p=0.642$           |
| Obesity (BMI $\geq 30$ )            | 1.57 [0.40-5.09] $p=0.471$      | 1.36 [0.52-3.53] $p=0.520$      | 0.67 [0.18-2.03] $p=0.519$      | 0.82 [1.17-2.78] $p=0.775$         | 1.06 [0.15-4.55] $p=0.940$                     | 2.23 [0.45-8.91] $p=0.274$            |
| Critical or severe COVID-19         | 0.80 [0.26-2.28] $p=0.691$      | 0.70 [0.32-1.48] $p=0.360$      | 0.29 [0.10-0.75] $p=0.016^*$    | 0.33 [0.90-0.97] $p=0.062$         | 1.29 [0.35-4.56] $p=0.681$                     | 1.03 [0.25-3.81] $p=0.965$            |
| Use of walking aids after discharge | 3.52 [0.97-11.62] $p=0.042^*$   | 2.38 [0.79-7.56] $p=0.124$      | 2.05 [0.64-6.12] $p=0.205$      | 0.69 [0.10-2.79] $p=0.653$         | 2.79 [0.56-11.14] $p=0.164$                    | 0.71 [0.03-4.24] $p=0.762$            |



|                                       |                               |                              |                              |                          |                               |                          |
|---------------------------------------|-------------------------------|------------------------------|------------------------------|--------------------------|-------------------------------|--------------------------|
| Accidental falls after discharge      | 5.02 [1.16-20.10]<br>p=0.023* | 2.28 [0.61-9.37] p=0.220     | 3.48 [0.90-13.46]<br>p=0.063 | 2.39 [0.48-9.58] p=0.237 | 5.51 [1.04-24.56]<br>p=0.029* | 1.27 [0.06-8.00] p=0.829 |
| Rehabilitation during hospitalization | 3.01 [0.59-13.69]<br>p=0.158  | 3.40 [0.97-13.89]<br>p=0.064 | 0.43 [0.07-1.86] p=0.298     | 0.64 [0.07-3.40] p=0.639 | 4.12 [0.64-22.75]<br>p=0.114  | 0.66 [0.02-5.60] p=0.751 |

Legend: OR = Odds Ratio; CI = Confidence interval; B-ADL = Basic Activities of Daily Living; BMI = Body Mass Index; \*statistically significant.

## Discussion

### *Statement of principal findings*

This study focused on the medium-term impact of COVID-19 on functional status of those individuals who were severely affected by this disease. Three months after hospital discharge for COVID-19, individuals still reported moderate to severe fatigue (88%) and dyspnea (44%). They recovered a good level of independence in basic ADL, but 76% still suffered participation restrictions. Females showed higher levels of fatigue, dyspnea, anxiety, and depression. Thus, these results confirm that individuals hospitalized experience persistent symptoms, adding insight into the impact of COVID-19 on limitations in activities and participation.

As millions of individuals are recovering from the infection, it may be appropriate to recognize those in need of rehabilitation, to help them to recover complete function and previous levels of participation.

Accordingly, the WHO recommends screening COVID-19 patients before hospital discharge to detect any rehabilitation needs they may have.<sup>2</sup> Reasonably, in the first few months after the outbreak of the pandemic, the very few studies published on the rehabilitation of patients with COVID-19 focused on treatment during the acute phase<sup>23,24</sup> or on the implications for health care organizations.<sup>14,25</sup> In December 2020, a rapid guideline on the management of the long-term outcomes of COVID-19 was published by the National Institute for Health and Care Excellence, which recommended a careful evaluation of symptoms, but also an overall assessment of the impact of the disease on daily life, including B-ADL, occupations, and social activities.<sup>26</sup> Recently, the WHO has published a new version of a living clinical guidance<sup>2</sup>, updating both the symptoms persisting after COVID-19 and the recommendations for rehabilitation needs assessment.<sup>27</sup> Moreover, in October 2021, the WHO coined the definition of 'post COVID-19 condition' to describe the condition of 'individuals with a history of probable or confirmed SARS-CoV-2 infection, usually three months from the onset of COVID-19, with symptoms lasting for at least two months, that cannot be explained by an alternative diagnosis. Common symptoms include fatigue, shortness of breath, cognitive dysfunction among other, and generally have an impact on everyday functioning'.<sup>28</sup>

Our study explored all the dimensions of health status by means of valid tools to assess symptoms, independence in B-ADL, and reintegration to normal living. The data collected seem to confirm that the likelihood of developing PASC is not linked to the severity of disease, and also confirm that fatigue and dyspnea are among the most frequent and persistent symptoms, as reported by some authors in the last months of 2020<sup>8,9</sup>, but also by more recent studies.<sup>29-35</sup>

1  
2  
3 Moreover, in the cohort investigated, clinically relevant anxiety and depression characterized 25%  
4 and 16% of participants respectively, which are proportions very close to those reported in a similar  
5 French cohort<sup>12</sup> and in a German cross-sectional study by Lemhofer.<sup>13</sup> Certainly, mood disorders can  
6 also be caused by the extraordinary nature of the pandemic, which has literally affected the entire  
7 planet. In fact, a study conducted on the healthy population living in the same area as the cohort  
8 investigated showed that, during the first peak of pandemic, mood disturbances were present in  
9 13.6%–54.5% of individuals.<sup>30</sup> Thus, regardless of their triggers, the prevalence of anxiety and  
10 depression during the pandemic seems higher than the usual estimate (10-11%).<sup>31</sup>

11  
12 Interestingly, despite the large number of patients who claimed complete post-discharge  
13 independence in B-ADL (91.3%), 76% did not recover full social participation three months after  
14 hospital discharge. Although data were collected during the summer, when the SARS-CoV-2  
15 contagion was low and the restrictions imposed were minimal, we cannot exclude that at least part  
16 of those limitations in social participation may have been due to the remaining restrictions or to the  
17 fear of contracting the disease again. Whatever the cause or the mix of causes, this finding should  
18 not be underestimated, given that social participation is a domain of health and an indicator of  
19 successful aging. In fact, where post-COVID-19 clinics have been activated, the accurate assessment  
20 of limitations in B-ADL and social participation is considered important by clinicians.<sup>32</sup>

21  
22 Social participation is one of the goals of rehabilitation interventions. However, during the first  
23 pandemic peak, rehabilitation was delivered to a limited number of COVID-19 patients, and, in our  
24 cohort, daily inpatient rehabilitation was mainly provided to patients admitted to an ICU; outpatient  
25 rehabilitation was offered to a small number of individuals. Focusing inpatient rehabilitation mainly  
26 on ICU patients was reasonable during the first wave of the pandemic, given that the long-term  
27 impact of COVID-19 was not known at the time, and directing all resources to the care of individuals  
28 struggling with severe or critical COVID-19 seemed appropriate, in the attempt to prevent the onset  
29 of post-intensive care syndromes, which affect up to 50% of ICU patients.<sup>36</sup>

30  
31 This may explain why our data do not show a significant association between rehabilitation  
32 interventions and any of the health outcomes assessed three months after hospital discharge.  
33 Rehabilitation was delivered to more severe patients, supporting them in recovering a level of  
34 activity and participation similar to that of individuals with mild or moderate COVID-19, who were  
35 generally not referred to rehabilitation. Moreover, outpatient rehabilitation was offered three times  
36 per week only to patients with severe persistent dyspnea or fatigue, as rearranging health pathways  
37 during the early months of the pandemic in Italy was extremely complex.<sup>14</sup>

38  
39 Taking into account the growing number of people affected by long-lasting consequences of COVID-  
40 19, outpatient rehabilitation is likely to represent a key element to support their recovery, as  
41 reported in a recent German survey,<sup>37</sup> and it is extremely important to expand outpatient  
42 therapeutic options to alleviate PASC and to hasten the return to normal life and working capacity.  
43 The most interesting finding of this study is that it seems that the long-term impact of COVID-19 is  
44 worse on women. Since the very first months of the pandemic, the need for sex-disaggregated data  
45 was advocated by researchers,<sup>38,39,40</sup> and the role of sex in the early immune response after SARS-  
46 CoV-2 infection and in mortality has been highlighted.<sup>41,42</sup> While mortality rate for COVID-19 seems  
47 higher in men with comorbidities,<sup>43</sup> our results, consistent with those of other research  
48 studies,<sup>44,45</sup> suggest that women may be more affected by COVID-19 sequelae several weeks after  
49  
50  
51  
52  
53  
54  
55  
56  
57  
58  
59  
60

1  
2  
3 hospital discharge. Although no clear pathophysiology can explain this phenomenon, it has been  
4 hypothesized that the higher representation of women in autoimmune diseases may explain the sex  
5 differences in the immunological response to the acute and post-acute manifestations of COVID-19.  
6

7<sup>35,46</sup>

### 8 9 *Strengths and weaknesses of the study*

10  
11 The results of this cross-sectional study should be interpreted with caution, since they originate  
12 from a single Italian province. Recruitment bias cannot be ruled out, as several individuals who were  
13 invited to participate did not adhere to the study (23% of those eligible) or could never be reached  
14 by phone (29%). Thus, it may be that individuals who were asymptomatic or those who still felt too  
15 unwell declined to participate. Moreover, for feasibility reasons, we chose to investigate only the  
16 most frequent persistent symptoms associated with PASC PACS (dyspnea and fatigue).  
17 Nevertheless, several others, including musculoskeletal pain, mood disturbances, and cognitive  
18 deficits, among others, may also lead to the need for rehabilitation. Since this study was  
19 uncontrolled, we cannot exclude that some of the persistent symptoms and manifestations may  
20 have been due to the prolonged hospitalization or to post-ICU syndrome, or that they might also  
21 affect the general population (e.g., anxiety, participation restrictions) due to the containment  
22 measures imposed by the Italian government. Causal inferencing and generalization of the  
23 conclusions are therefore challenging.  
24  
25

26  
27 One strength of this study is that the ICF framework was used to guide data collection, and the  
28 assessment of health status extended beyond impairment. Moreover, a valid assessment of  
29 outcomes allowed us to confirm differences between the sexes in PASC, and, although further  
30 exploration is required, these data suggest that female COVID-19 survivors may need specific follow-  
31 up to ensure appropriate interventions<sup>34</sup> and equity in access to care.  
32  
33  
34  
35  
36  
37  
38  
39

### 40 *Unanswered questions and future research*

41  
42 After hospital discharge, differences between the sexes emerged in the long-term impact of COVID-  
43 19 in this Italian study. These differences should be searched and considered in future research.  
44 Future studies should investigate if tailored rehabilitation is offered and if equity is warranted in  
45 access to care.  
46  
47  
48  
49

### 50 **Conclusions**

51  
52 Examining the long-term impact of COVID-19 is essential, given that the number of recovering  
53 individuals is growing daily. Healthcare services must implement the best-practice standards of care  
54 for individuals with PASC. The results of this study indicate that women may recover more slowly  
55 than men. If confirmed, this information may prevent gender inequalities in accessing health  
56 services and facilitate appropriate referral to tailored rehabilitation.  
57  
58  
59  
60

1  
2  
3  
4  
5  
6  
7  
8  
9  
10  
11  
12  
13  
14  
15  
16  
17  
18  
19  
20  
21  
22  
23  
24  
25  
26  
27  
28  
29  
30  
31  
32  
33  
34  
35  
36  
37  
38  
39  
40  
41  
42  
43  
44  
45  
46  
47  
48  
49  
50  
51  
52  
53  
54  
55  
56  
57  
58  
59  
60

**Figure 1.** Flow diagram of the study participants.

**Acknowledgments:** the authors thank Jacqueline M. Costa for the English language editing.

**Competing Interests:** all authors have completed the ICMJE uniform disclosure form at [www.icmje.org/coi\\_disclosure.pdf](http://www.icmje.org/coi_disclosure.pdf) and declare: no support from any organization for the submitted work; no financial relationships with any organizations that might have an interest in the submitted work in the previous three years; no other relationships or activities that could appear to have influenced the submitted work.

**Contributorship statement:** as dictated by the Authorship guidelines of the International Committee of Medical Journal Editors, SF, MD, CM, MAA, GB, DG, AB, OE, CG, MS, LB and SC gave substantial contributions to the conception or design of the work or to the acquisition, analysis, or interpretation of data for the work; AND gave substantial contributions to the drafting the work or to its critical revision for important intellectual content; AND approved the final version to be published. All the authors agree to be accountable for all aspects of the work and ensure that questions related to the accuracy or integrity of any part of the work are appropriately investigated and resolved. This manuscript was completely written by its authors and reviewed in kind contribution for English language by an editor. The authors did not make use of medical writers. SF had full access to all the data in the study and take responsibility for the integrity of the data and the accuracy of the data analysis. LB conducted and is responsible for the data analysis. The corresponding author attests that all listed authors meet authorship criteria and that no others meeting the criteria have been omitted.

**Ethical approval:** This independent study was approved by Provincial Ethics Committee of Reggio Emilia on 21/04/2020 (ID 2020/0133). All participants provided written informed consent to participate in the trial.

**Funding:** This research received no specific grant from any funding agency in the public, commercial or not-for-profit sectors

**Transparency statement:** the lead author affirms that the manuscript is an honest, accurate, and transparent account of the study being reported; no important aspects of the study have been omitted; any discrepancies from the study as originally planned (and, if relevant, registered) have been explained.

**Data sharing:** Reasonable requests for all of the individual participant data collected during the trial, after deidentification, should be made to the corresponding author and will be considered by the REACT lead author. The presented data are anonymized and risk of identification is low.

1  
2  
3 **Dissemination declaration:** we planned to disseminate the results to study participants who will  
4 specifically request them via e-mail.  
5  
6

7 **License for publication**  
8

9 *"The Corresponding Author has the right to grant on behalf of all authors and does grant on behalf*  
10 *of all authors, a worldwide license to the Publishers and its licensees in perpetuity, in all forms,*  
11 *formats and media (whether known now or created in the future), to i) publish, reproduce, distribute,*  
12 *display and store the Contribution, ii) translate the Contribution into other languages, create*  
13 *adaptations, reprints, include within collections and create summaries, extracts and/or, abstracts of*  
14 *the Contribution, iii) create any other derivative work(s) based on the Contribution, iv) to exploit all*  
15 *subsidiary rights in the Contribution, v) the inclusion of electronic links from the Contribution to third*  
16 *party material where-ever it may be located; and, vi) license any third party to do any or all of the*  
17 *above."*  
18  
19  
20  
21  
22  
23  
24  
25  
26  
27  
28  
29  
30  
31  
32  
33  
34  
35  
36  
37  
38  
39  
40  
41  
42  
43  
44  
45  
46  
47  
48  
49  
50  
51  
52  
53  
54  
55  
56  
57  
58  
59  
60

## References

1. World Health Organisation, Weekly Epidemiological Update on COVID-19 – 21 December 2021 <https://www.who.int/publications/m/item/weekly-epidemiological-update-on-covid-19---21-december-2021>. Accessed Dec 27, 2021.
2. World Health Organisation, COVID-19 Clinical management: living guidance, 23 November 2021 <https://www.who.int/publications/i/item/WHO-2019-nCoV-clinical-2021-2>. Accessed Jan 9, 2022.
3. Wu Z, McGoogan JM. Characteristics of and Important Lessons From the Coronavirus Disease 2019 (COVID-19) Outbreak in China: Summary of a Report of 72 314 Cases From the Chinese Center for Disease Control and Prevention. *JAMA* 2020 Apr 7; 323(13): 1239-1242.
4. Hatmi ZN. A Systematic Review of Systematic Reviews on the COVID-19 Pandemic [published online ahead of print, 2021 Jan 26]. *SN Compr Clin Med*. 2021;1-18. doi:10.1007/s42399-021-00749-y
5. Collins FS. NIH launches new initiative to study “Long COVID.” National Institutes of Health. February 23, 2021. <https://www.nih.gov/about-nih/who-we-are/nih-director/statements/nih-launches-new-initiative-study-long-covid>. Accessed March 30, 2021.
6. Maxwell E. Living with Covid19: A dynamic review of the evidence around ongoing Covid19 symptoms (often called Long Covid). National Institute for Health Research; 30 September 2020. <https://evidence.nihr.ac.uk/themedreview/living-with-covid19/>. Accessed March 30, 2021.
7. Garrigues E, Janvier P, Kherabi Y, et al. Post-discharge persistent symptoms and health-related quality of life after hospitalization for COVID-19. *J Infect*. 2020;81(6):e4-e6. doi:10.1016/j.jinf.2020.08.029
8. Goërtz YMJ, Van Herck M, Delbressine JM, et al. Persistent symptoms 3 months after a SARS-CoV-2 infection: the post-COVID-19 syndrome?. *ERJ Open Res*. 2020;6(4):00542-2020. Published 2020 Oct 26. doi:10.1183/23120541.00542-2020
9. van den Borst B, Peters JB, Brink M, et al. Comprehensive health assessment three months after recovery from acute COVID-19 [published online ahead of print, 2020 Nov 21]. *Clin Infect Dis*. 2020;ciaa1750. doi:10.1093/cid/ciaa1750
10. Townsend L, Dyer AH, Jones K, et al. Persistent fatigue following SARS-CoV-2 infection is common and independent of severity of initial infection. *PLoS One*. 2020;15(11):e0240784. Published 2020 Nov 9. doi:10.1371/journal.pone.0240784
11. Carfi A, Bernabei R, Landi F; Gemelli Against COVID-19 Post-Acute Care Study Group. Persistent Symptoms in Patients After Acute COVID-19. *JAMA*. 2020;324(6):603-605. doi:10.1001/jama.2020.12603
12. Writing Committee for the COMEBAC Study Group, Morin L, Savale L, et al. Four-Month Clinical Status of a Cohort of Patients After Hospitalization for COVID-19. *JAMA*. 2021;325(15):1525-1534. doi:10.1001/jama.2021.3331
13. Lemhöfer C, Sturm C, Loudovici-Krug D, Best N, Gutenbrunner C. The impact of Post-COVID-Syndrome on functioning - results from a community survey in patients after mild and moderate SARS-CoV-2-infections in Germany. *J Occup Med Toxicol*. 2021 Oct 7;16(1):45. doi: 10.1186/s12995-021-00337-9.

14. Boldrini P, Bernetti A, Fiore P; SIMFER Executive Committee, SIMFER Committee for International Affairs. Impact of COVID-19 outbreak on rehabilitation services and Physical and Rehabilitation Medicine physicians' activities in Italy. An official document of the Italian PRM Society (SIMFER). *Eur J Phys Rehabil Med.* 2020;56(3):316-318. doi:10.23736/S1973-9087.20.06256-5
15. World Health Organisation, International Classification of Functioning, Disability and Health (ICF), 22 May 2001 <https://www.who.int/standards/classifications/international-classification-of-functioning-disability-and-health>. Accessed March 30, 2021.
16. von Elm E, Altman DG, Egger M, et al. The Strengthening the Reporting of Observational Studies in Epidemiology (STROBE) statement: guidelines for reporting observational studies. *Lancet.* 2007;370(9596):1453-1457. doi:10.1016/S0140-6736(07)61602-X
17. Bestall JC, Paul EA, Garrod R, Garnham R, Jones PW, Wedzicha JA. Usefulness of the Medical Research Council (MRC) dyspnoea scale as a measure of disability in patients with chronic obstructive pulmonary disease. *Thorax.* 1999;54(7):581-586. doi:10.1136/thx.54.7.581
18. Krupp LB, LaRocca NG, Muir-Nash J, Steinberg AD. The fatigue severity scale. Application to patients with multiple sclerosis and systemic lupus erythematosus. *Arch Neurol.* 1989;46(10):1121-1123. doi:10.1001/archneur.1989.00520460115022
19. Zigmond AS, Snaith RP. The hospital anxiety and depression scale. *Acta Psychiatr Scand.* 1983;67(6):361-70.
20. Galeoto G, Lauti A, Palumbo A et al. The Barthel Index: Italian translation, adaptation and validation. *Int J Neurol Neurother*,2015;2(2), 2378-3001.
21. Paltrinieri S. Cross-cultural validation of the Reintegration to Normal Living Index (RNLI) in Italian: translation and pilot study. April, 2021, MSc Thesis in Rehabilitation Science. University of Firenze, Italy
22. R Core Team (2020). R: A language and environment for statistical computing. R Foundation for Statistical Computing, Vienna, Austria. <https://www.R-project.org/>. Accessed April 14, 2020.
23. Chinese Association of Rehabilitation Medicine; Respiratory Rehabilitation Committee of Chinese Association of Rehabilitation Medicine; Cardiopulmonary Rehabilitation Group of Chinese Society of Physical Medicine and Rehabilitation. [Recommendations for respiratory rehabilitation of coronavirus disease 2019 in adult]. *Zhonghua Jie He He Hu Xi Za Zhi.* 2020 Apr 12;43(4):308-314. Chinese. doi: 10.3760/cma.j.cn112147-20200228-00206.
24. Thomas P, Baldwin C, Bissett B, et al. Physiotherapy management for COVID-19 in the acute hospital setting: clinical practice recommendations. *J Physiother.* 2020;66(2):73-82. doi:10.1016/j.jphys.2020.03.011
25. McNeary L, Maltser S, Verduzco-Gutierrez M. Navigating Coronavirus Disease 2019 (Covid-19) in Psychiatry: A CAN Report for Inpatient Rehabilitation Facilities. *PM R.* 2020;12(5):512-515. doi:10.1002/pmrj.12369
26. COVID-19 rapid guideline: managing the long-term effects of COVID-19 (NG188): Evidence review 5: interventions. London: National Institute for Health and Care Excellence (UK); 2020 Dec. (NICE Guideline, No. 188.) Available from: <https://www.ncbi.nlm.nih.gov/books/NBK567264/>

- 1
  - 2
  - 3
  - 4
  - 5
  - 6
  - 7
  - 8
  - 9
  - 10
  - 11
  - 12
  - 13
  - 14
  - 15
  - 16
  - 17
  - 18
  - 19
  - 20
  - 21
  - 22
  - 23
  - 24
  - 25
  - 26
  - 27
  - 28
  - 29
  - 30
  - 31
  - 32
  - 33
  - 34
  - 35
  - 36
  - 37
  - 38
  - 39
  - 40
  - 41
  - 42
  - 43
  - 44
  - 45
  - 46
  - 47
  - 48
  - 49
  - 50
  - 51
  - 52
  - 53
  - 54
  - 55
  - 56
  - 57
  - 58
  - 59
  - 60
27. World Health Organisation, Rehabilitation needs of people recovering from COVID-19 Scientific brief, 29 November 2021, [https://www.who.int/publications/m/item/WHO-2019-nCoV-Sci\\_Brief-Rehabilitation-2021.1](https://www.who.int/publications/m/item/WHO-2019-nCoV-Sci_Brief-Rehabilitation-2021.1), accessed Jan 9,2022.
28. World Health Organisation, A clinical case definition of post COVID-19 condition by a Delphi consensus” 6 October 2021, [https://www.who.int/publications/i/item/WHO-2019-nCoV-Post\\_COVID-19\\_condition-Clinical\\_case\\_definition-2021.1](https://www.who.int/publications/i/item/WHO-2019-nCoV-Post_COVID-19_condition-Clinical_case_definition-2021.1), accessed Jan 9, 2022
29. Shah W, Hillman T, Playford ED, Hishmeh L. Managing the long term effects of covid-19: summary of NICE, SIGN, and RCGP rapid guideline. *BMJ*. 2021;372:n136. Published 2021 Jan 22. doi:10.1136/bmj.n136
30. Costi S, Paltrinieri S, Bressi B, Fugazzaro S, Giorgi Rossi P, Mazzini E. Poor Sleep during the First Peak of the SARS-CoV-2 Pandemic: A Cross-Sectional Study. *Int J Environ Res Public Health*. 2021 Jan 4;18(1):306. doi: 10.3390/ijerph18010306. PMID: 33406588; PMCID: PMC7795804.
31. De Girolamo G, Polidori G, Morosini P, et al. Prevalence of common mental disorders in Italy: results from the European Study of the Epidemiology of Mental Disorders (ESEMeD). *Soc Psychiatry Psychiatr Epidemiol*. 2006;41(11):853-861. doi:10.1007/s00127-006-0097-4
32. JAMA Medical News Audio: An Inside Look at a Post-COVID-19 Clinic. <https://edhub.ama-assn.org/jn-learning/audio-player/18608245>, accessed May 7, 2021.
33. Huang C, Huang L, Wang Y, et al. 6-month consequences of COVID-19 in patients discharged from hospital: a cohort study. *Lancet*. 2021 Jan 16;397(10270):220-232. doi: 10.1016/S0140-6736(20)32656-8.
34. Iqbal A, Iqbal K, Arshad Ali S, et al. The COVID-19 Sequelae: A Cross-Sectional Evaluation of Post-recovery Symptoms and the Need for Rehabilitation of COVID-19 Survivors. *Cureus*. 2021 Feb 2;13(2):e13080. doi: 10.7759/cureus.13080
35. Tleyjeh IM, Saddik B, AlSwaidan N, et al. Prevalence and predictors of Post-Acute COVID-19 Syndrome (PACS) after hospital discharge: A cohort study with 4 months median follow-up. *PLoS One*. 2021 Dec 7;16(12):e0260568. doi: 10.1371/journal.pone.0260568.
36. Jaffri A, Jaffri UA. Post-Intensive care syndrome and COVID-19: crisis after a crisis?. *Heart Lung*. 2020;49(6):883-884. doi:10.1016/j.hrtlng.2020.06.006
37. Lemhöfer C, Best N, Bökel A, et al. Satisfaction of COVID-19 Sufferers with Actors of the Health Care System and Rehabilitative Therapy Care using the COVID-19-Rehabilitation Needs Questionnaire (C19-RehabNeQ) in Bavaria. *Physikalische Medizin, Rehabilitationsmedizin*. 2021 Aug 25. doi: 10.1055/a-1528-1667
38. Wenham C, Smith J, Morgan R; Gender and COVID-19 Working Group. COVID-19: the gendered impacts of the outbreak. *Lancet*. 2020;395(10227):846-848. doi:10.1016/S0140-6736(20)30526-2
39. Purdie A, Hawkes S, Buse K, et al. Sex, gender and COVID-19: Disaggregated data and health disparities. <https://blogs.bmj.com/bmjgh/2020/03/24/sex-gender-and-covid-19-disaggregated-data-and-health-disparities/>. Accessed March 24, 2020.
40. Spagnolo PA, Manson JE, Joffe H. Sex and Gender Differences in Health: What the COVID-19 Pandemic Can Teach Us. *Ann Intern Med*. 2020;173(5):385-386. doi:10.7326/M20-1941



- 1
- 2
- 3
- 4 41. Kelada M, Anto A, Dave K, Saleh SN. The Role of Sex in the Risk of Mortality From COVID-19
- 5 Amongst Adult Patients: A Systematic Review. *Cureus*. 2020;12(8):e10114. Published 2020
- 6 Aug 29. doi:10.7759/cureus.10114
- 7 42. Raparelli V, Palmieri L, Canevelli M, et al. Sex differences in clinical phenotype and
- 8 transitions of care among individuals dying of COVID-19 in Italy. *Biol Sex Differ*.
- 9 2020;11(1):57. Published 2020 Oct 16. doi:10.1186/s13293-020-00334-3
- 10 43. Marconi M. Gender differences in Covid-19: the importance of sex-disaggregated data.
- 11 *Ital J Gender-Specific Med* 2021; 7(1): 4-6
- 12 44. Huang C, Huang L, Wang Y, et al. 6-month consequences of COVID-19 in patients
- 13 discharged from hospital: a cohort study. *Lancet*. 2021 Jan 16;397(10270):220-232. doi:
- 14 10.1016/S0140-6736(20)32656-8.
- 15 45. Sudre CH, Murray B, Varsavsky T, et al. Attributes and predictors of long COVID. *Nat Med*.
- 16 2021 Apr;27(4):626-631. doi: 10.1038/s41591-021-01292-y.
- 17 46. Ngo ST, Steyn FJ, McCombe PA. Gender differences in autoimmune disease. *Front*
- 18 *Neuroendocrinol*. 2014 Aug;35(3):347-69. doi: 10.1016/j.yfrne.2014.04.004.
- 19
- 20
- 21
- 22
- 23
- 24
- 25
- 26
- 27
- 28
- 29
- 30
- 31
- 32
- 33
- 34
- 35
- 36
- 37
- 38
- 39
- 40
- 41
- 42
- 43
- 44
- 45
- 46
- 47
- 48
- 49
- 50
- 51
- 52
- 53
- 54
- 55
- 56
- 57
- 58
- 59
- 60

peer review only

Flow diagram REACT 2020

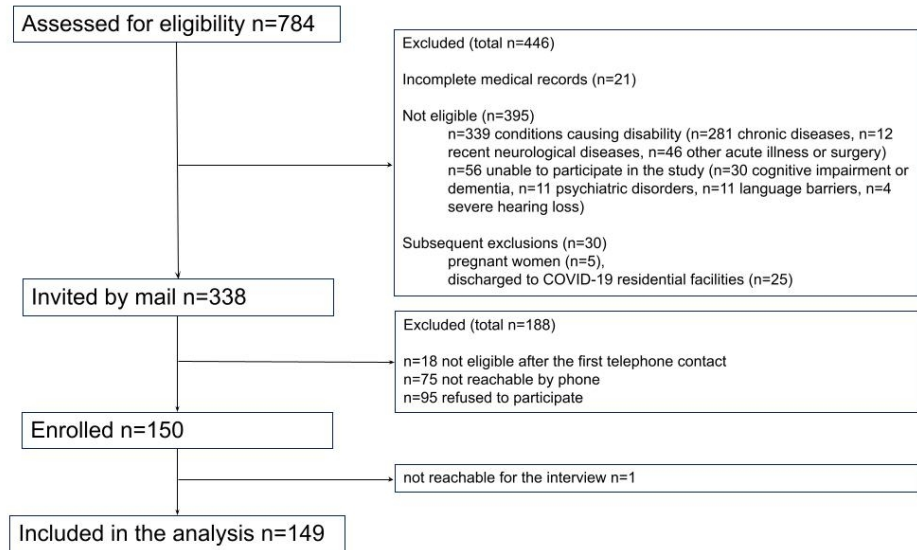

Figure 1. Flow diagram of the study participants

372x287mm (72 x 72 DPI)

STROBE Statement—Checklist of items that should be included in reports of *cross-sectional studies*

|                              | Item No | Recommendation                                                                                                                                                                                    | Page No       |
|------------------------------|---------|---------------------------------------------------------------------------------------------------------------------------------------------------------------------------------------------------|---------------|
| <b>Title and abstract</b>    | 1       | (a) Indicate the study's design with a commonly used term in the title or the abstract                                                                                                            | 1             |
|                              |         | (b) Provide in the abstract an informative and balanced summary of what was done and what was found                                                                                               | 2             |
| <b>Introduction</b>          |         |                                                                                                                                                                                                   |               |
| Background/rationale         | 2       | Explain the scientific background and rationale for the investigation being reported                                                                                                              | 4             |
| Objectives                   | 3       | State specific objectives, including any prespecified hypotheses                                                                                                                                  | 4             |
| <b>Methods</b>               |         |                                                                                                                                                                                                   |               |
| Study design                 | 4       | Present key elements of study design early in the paper                                                                                                                                           | 4-5           |
| Setting                      | 5       | Describe the setting, locations, and relevant dates, including periods of recruitment, exposure, follow-up, and data collection                                                                   | 5             |
| Participants                 | 6       | (a) Give the eligibility criteria, and the sources and methods of selection of participants                                                                                                       | 5             |
| Variables                    | 7       | Clearly define all outcomes, exposures, predictors, potential confounders, and effect modifiers. Give diagnostic criteria, if applicable                                                          | NA            |
| Data sources/<br>measurement | 8*      | For each variable of interest, give sources of data and details of methods of assessment (measurement). Describe comparability of assessment methods if there is more than one group              | 5             |
| Bias                         | 9       | Describe any efforts to address potential sources of bias                                                                                                                                         | NA            |
| Study size                   | 10      | Explain how the study size was arrived at                                                                                                                                                         | 6             |
| Quantitative variables       | 11      | Explain how quantitative variables were handled in the analyses. If applicable, describe which groupings were chosen and why                                                                      | 6             |
| Statistical methods          | 12      | (a) Describe all statistical methods, including those used to control for confounding                                                                                                             | 6             |
|                              |         | (b) Describe any methods used to examine subgroups and interactions                                                                                                                               | 6             |
|                              |         | (c) Explain how missing data were addressed                                                                                                                                                       | NA            |
|                              |         | (d) If applicable, describe analytical methods taking account of sampling strategy                                                                                                                | NA            |
|                              |         | (e) Describe any sensitivity analyses                                                                                                                                                             | 6             |
| <b>Results</b>               |         |                                                                                                                                                                                                   |               |
| Participants                 | 13*     | (a) Report numbers of individuals at each stage of study—eg numbers potentially eligible, examined for eligibility, confirmed eligible, included in the study, completing follow-up, and analysed | 6             |
|                              |         | (b) Give reasons for non-participation at each stage                                                                                                                                              | 5             |
|                              |         | (c) Consider use of a flow diagram                                                                                                                                                                | Figure 1, p.7 |
| Descriptive data             | 14*     | (a) Give characteristics of study participants (eg demographic, clinical, social) and information on exposures and potential confounders                                                          | 7-8           |
|                              |         | (b) Indicate number of participants with missing data for each variable of interest                                                                                                               | 8-9           |

|                          |     |                                                                                                                                                                                                              |                 |
|--------------------------|-----|--------------------------------------------------------------------------------------------------------------------------------------------------------------------------------------------------------------|-----------------|
| Outcome data             | 15* | Report numbers of outcome events or summary measures                                                                                                                                                         | 10              |
| Main results             | 16  | (a) Give unadjusted estimates and, if applicable, confounder-adjusted estimates and their precision (eg, 95% confidence interval). Make clear which confounders were adjusted for and why they were included | 11-12; Table 4. |
|                          |     | (b) Report category boundaries when continuous variables were categorized                                                                                                                                    | NA              |
|                          |     | (c) If relevant, consider translating estimates of relative risk into absolute risk for a meaningful time period                                                                                             | NA              |
| Other analyses           | 17  | Report other analyses done—eg analyses of subgroups and interactions, and sensitivity analyses                                                                                                               | 11-12           |
| <b>Discussion</b>        |     |                                                                                                                                                                                                              |                 |
| Key results              | 18  | Summarise key results with reference to study objectives                                                                                                                                                     | 12-13           |
| Limitations              | 19  | Discuss limitations of the study, taking into account sources of potential bias or imprecision. Discuss both direction and magnitude of any potential bias                                                   | 14              |
| Interpretation           | 20  | Give a cautious overall interpretation of results considering objectives, limitations, multiplicity of analyses, results from similar studies, and other relevant evidence                                   | 12-14           |
| Generalisability         | 21  | Discuss the generalisability (external validity) of the study results                                                                                                                                        | 14              |
| <b>Other information</b> |     |                                                                                                                                                                                                              |                 |
| Funding                  | 22  | Give the source of funding and the role of the funders for the present study and, if applicable, for the original study on which the present article is based                                                | 15              |

\*Give information separately for exposed and unexposed groups.

**Note:** An Explanation and Elaboration article discusses each checklist item and gives methodological background and published examples of transparent reporting. The STROBE checklist is best used in conjunction with this article (freely available on the Web sites of PLoS Medicine at <http://www.plosmedicine.org/>, Annals of Internal Medicine at <http://www.annals.org/>, and Epidemiology at <http://www.epidem.com/>). Information on the STROBE Initiative is available at [www.strobe-statement.org](http://www.strobe-statement.org).
